# Supplementary material for: Mechanism and regio- and stereoselectivity in an NHC-catalyzed Mannich/lactamization domino reaction
Source: Royal Society of Chemistry journal article supplement (doi:10.1039/d1cp00369k), 2021-01-01
Supplement: d1cp00369k1.pdf [file d1cp00369k1.pdf]

*Supporting Information*

**Mechanism, Regio- and Stereoselectivity in an NHC-catalyzed  
Mannich/Lactamization Domino Reaction**

**Yan Li\*, Zhilin Li, Zhiqiang Zhang**

*School of Chemical Engineering, University of Science and Technology Liaoning,  
Anshan 114051, P. R. China*

***Corresponding person: Yan Li***

***E-mail: yanli@ustl.edu.cn***

***Telephone: +86-412-5929627***

***Fax: 86-412-5929627***

## Contents

|                                                                        |    |
|------------------------------------------------------------------------|----|
| 1. Test results of computational methods.....                          | S3 |
| 2. Free energy surface and optimized structures for Step 1.....        | S4 |
| 3. Free energy surface and optimized transition states for Step 2..... | S5 |
| 4. 3-D structures involved in the C5–C6 bond formation step.....       | S6 |
| 4. Free energy surface for the unfavored pathways.....                 | S7 |
| 5. Cartesian coordinates of all the stationary points.....             | S8 |

### 1: Test results of computational methods at different levels

To examine the effects of the functional and basis set on the stereoselectivity of the reaction, single point energy calculations with different functionals ( $\omega$ B97X-D, M06-2X-D3, B3LYP-D3 and B3PW91-D3 with 6-311++G(2df,2pd) basis set) and basis set (6-311++G(d,p) together with M06-2X-D3) have been conducted (for details see Table S1). The results are collected in Table S2. As can be seen from Table S2, the relative free energies calculated by these levels (**L2-L6**) are similar to those calculated at SMD(toluene)M06-2X-D3/6-311++G(2df,2pd) (**L1**). Thus the computational level is reliable for the reaction system studied in this work.

**Table S1.** Different computational levels.

| Level | Functional      | Basis set         | Solvent model |
|-------|-----------------|-------------------|---------------|
| L1    | M06-2X-D3       | 6-311++G(2df,2pd) | SMD           |
| L2    | M06-2X-D3       | 6-311++G(2df,2pd) | IEFPCM        |
| L3    | $\omega$ B97X-D | 6-311++G(2df,2pd) | SMD           |
| L4    | B3LYP-D3        | 6-311++G(2df,2pd) | SMD           |
| L5    | B3PW91-D3       | 6-311++G(2df,2pd) | SMD           |
| L6    | M06-2X-D3       | 6-311++G(d,p)     | SMD           |

**Table S2.** Comparison of the relative free energies (in kcal/mol) of the stereoselective transition states at different levels.

|         | L1   | L2   | L3   | L4   | L5   | L6   |
|---------|------|------|------|------|------|------|
| TS5(RR) | 14.2 | 16.9 | 12.3 | 13.4 | 14.4 | 15.5 |
| TS5(RS) | 9.9  | 12.2 | 8.2  | 8.9  | 9.5  | 10.4 |
| TS5(SR) | 5.5  | 4.4  | 4.7  | 3.9  | 3.9  | 4.7  |
| TS5(SS) | 0.0  | 0.0  | 0.0  | 0.0  | 0.0  | 0.0  |

Fig. S1 Free energy surface and optimized structures for Step 1. Free energies (in kcal/mol) are at SMD(toluene)M06-2X-D3/6-311++G(2df,2pd) level. Bond lengths are given in Å.

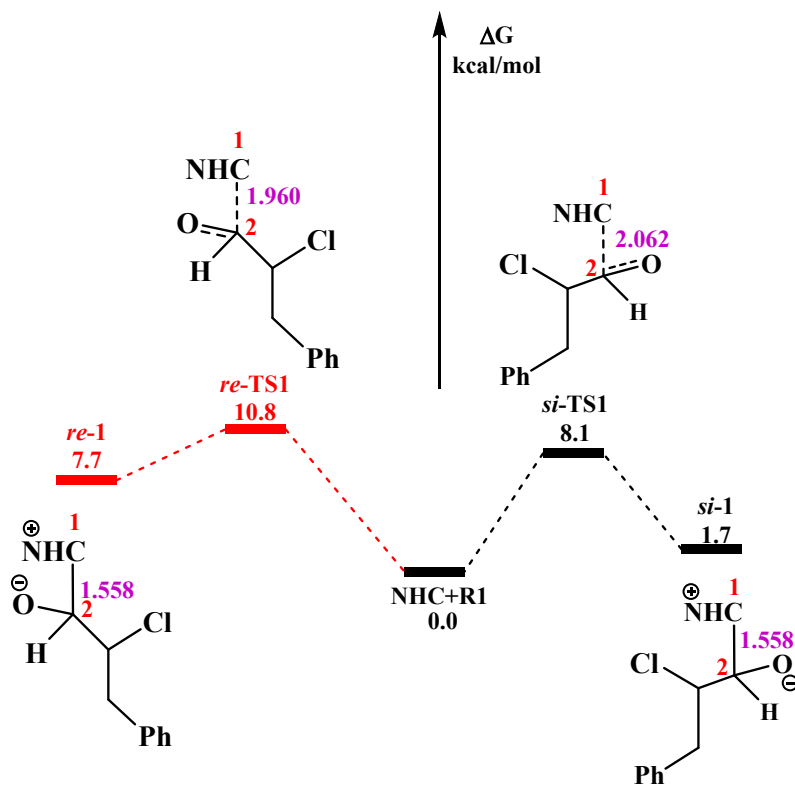

Fig. S2 Free energy surface and optimized transition states for Step 2. Free energies (in kcal/mol) are at SMD(toluene)M06-2X-D3/6-311++G(2df,2pd) level. Bond lengths are given in Å.

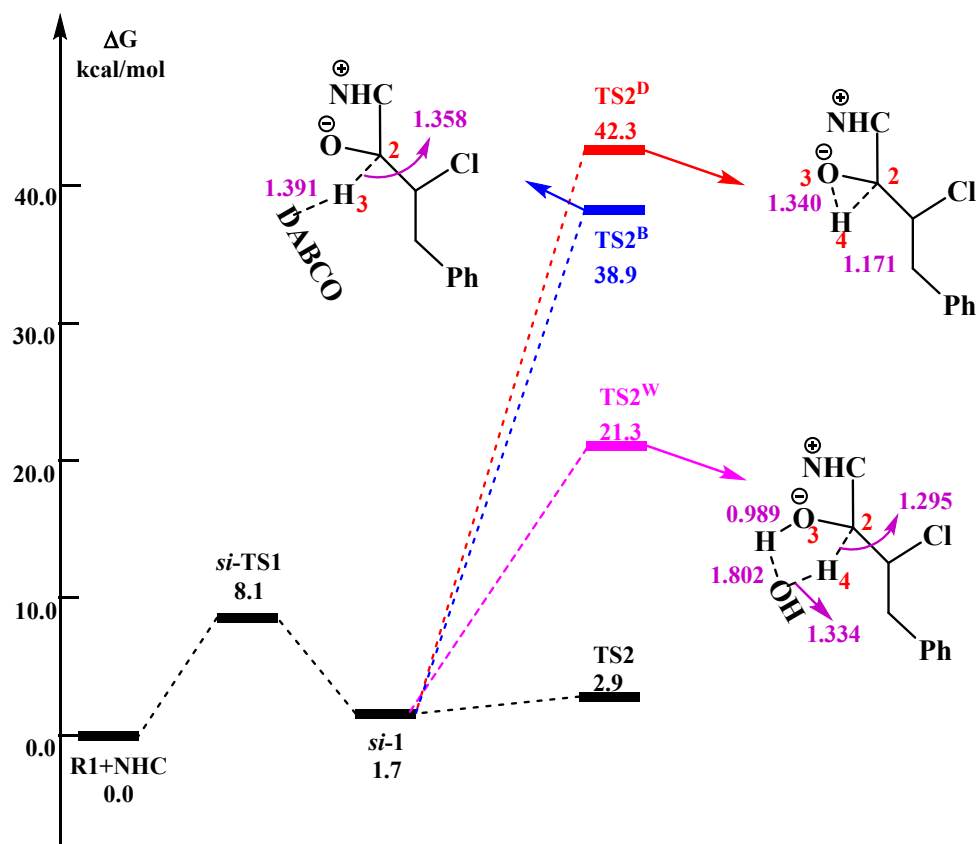

Fig. S3 3-D structures involved in the C5–C6 bond formation step. Bond lengths are given in Å.

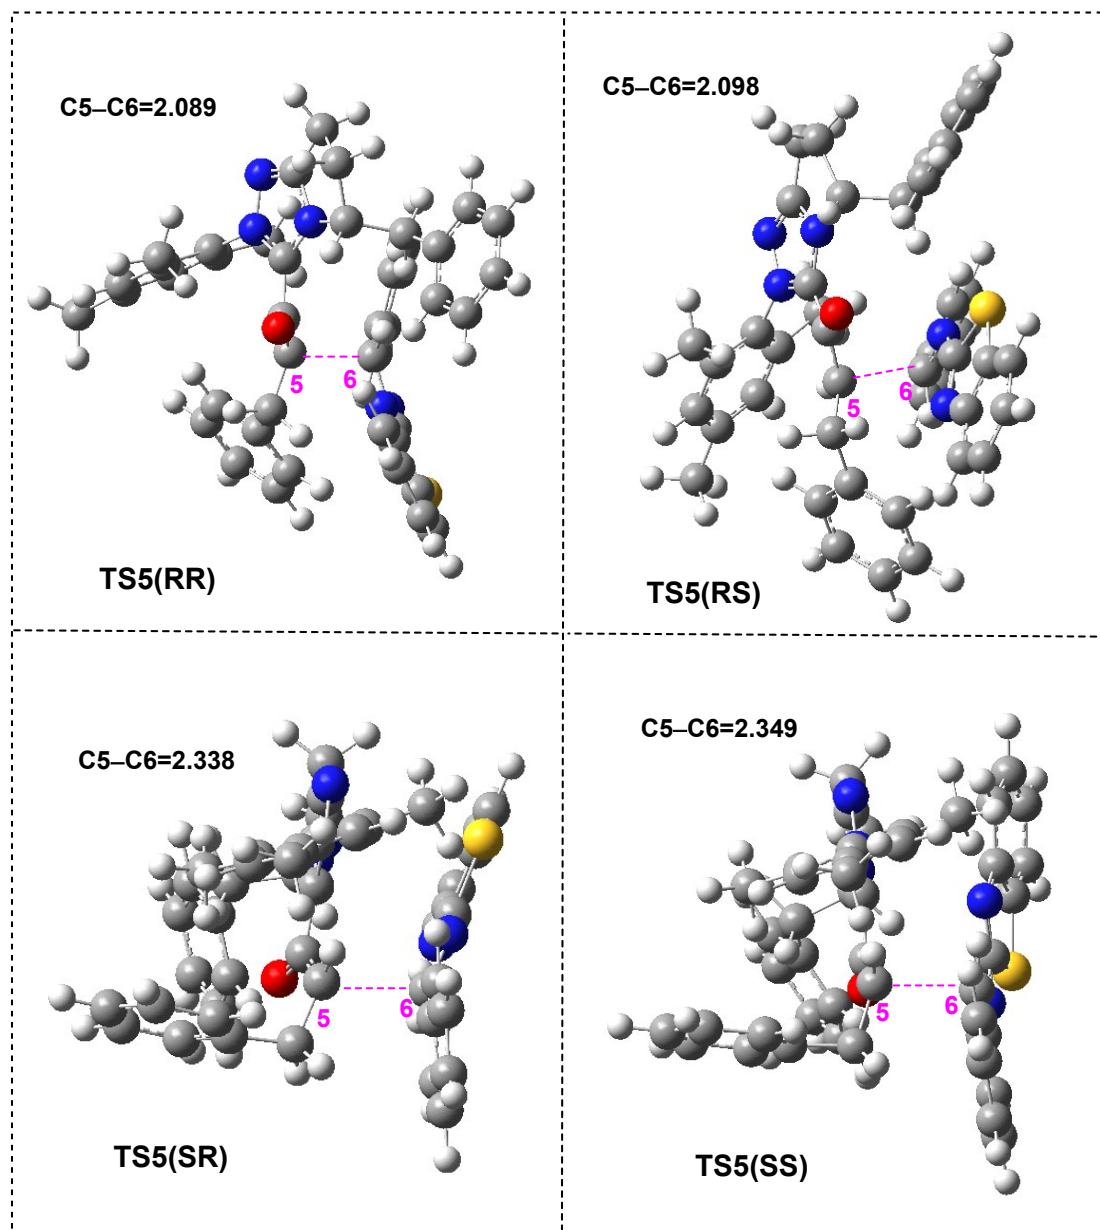

Fig. S4 Free energy surface for the unfavored pathways. Free energies (in kcal/mol) are at SMD(toluene)M06-2X-D3/6-311++G(2df,2pd) level.

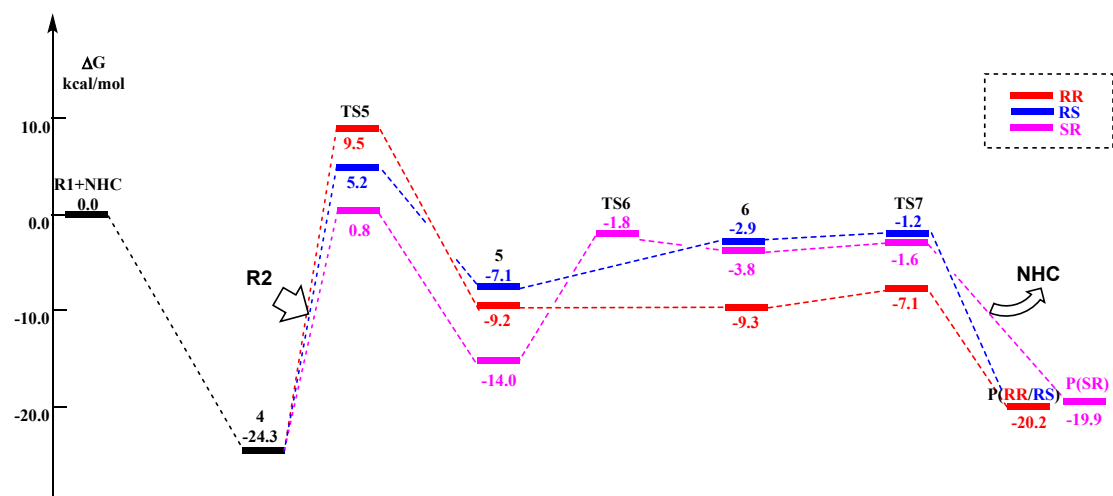

## Coordinates

### NHC

|   |             |             |             |
|---|-------------|-------------|-------------|
| C | 0.31031000  | -0.26475700 | 0.05366200  |
| C | -0.07422900 | 1.96162900  | 0.01073700  |
| C | -1.12193300 | 3.02413900  | -0.07803000 |
| C | -2.38426400 | 2.20478200  | 0.28308600  |
| C | -2.09801600 | 0.75209700  | -0.16883600 |
| H | -0.93893700 | 3.86006400  | 0.59774800  |
| H | -1.17643000 | 3.41610800  | -1.09893200 |
| H | -3.29757300 | 2.59554700  | -0.16877100 |
| H | -2.35090300 | 0.62658000  | -1.22867100 |
| N | 1.21200400  | 1.88955100  | 0.12268800  |
| N | 1.41630700  | 0.51476200  | 0.14465900  |
| N | -0.63753800 | 0.71258800  | -0.03371500 |
| H | -2.51471300 | 2.20502100  | 1.37094100  |
| C | 2.75437800  | 0.02908800  | 0.28501700  |
| C | 3.44254700  | 0.28706200  | 1.47602300  |
| C | 3.33142700  | -0.68372800 | -0.76780600 |
| C | 4.74553200  | -0.18852000 | 1.59257600  |
| C | 4.63752600  | -1.14702700 | -0.60150500 |
| C | 5.35949300  | -0.90655800 | 0.56478900  |
| H | 5.29309300  | -0.00072300 | 2.51369700  |
| H | 5.10181900  | -1.70555700 | -1.41072900 |
| C | -2.83450400 | -0.30751600 | 0.66271500  |
| H | -3.77365600 | 0.13768300  | 1.01033800  |
| H | -2.22875300 | -0.51422800 | 1.55250500  |
| C | -3.15454300 | -1.58619500 | -0.08076300 |
| C | -4.48094500 | -1.90709400 | -0.37482000 |
| C | -2.13991800 | -2.45408600 | -0.49848600 |
| C | -4.79724800 | -3.07141600 | -1.07074300 |
| H | -5.27663400 | -1.24011800 | -0.05159500 |
| C | -2.45678100 | -3.61664200 | -1.19457700 |
| H | -1.10535900 | -2.19945800 | -0.27956200 |
| C | -3.78354100 | -3.93023100 | -1.48272400 |
| H | -5.83452300 | -3.30601600 | -1.28843600 |
| H | -1.66118000 | -4.28351000 | -1.51232200 |
| H | -4.02535600 | -4.83914600 | -2.02447700 |
| C | 6.77464000  | -1.40139300 | 0.72219100  |
| H | 7.47729200  | -0.56473700 | 0.78526200  |
| H | 6.88544400  | -1.99019500 | 1.63734500  |
| H | 7.07181400  | -2.02725100 | -0.12188900 |
| C | 2.78329500  | 1.04262900  | 2.59868500  |
| H | 2.65588700  | 2.09643700  | 2.33782700  |
| H | 1.78674600  | 0.63863200  | 2.80233100  |



|   |            |             |             |
|---|------------|-------------|-------------|
| H | 3.38056500 | 0.97407200  | 3.50993700  |
| C | 2.57039100 | -0.94632000 | -2.03984100 |
| H | 1.71651200 | -1.60222000 | -1.85199300 |
| H | 2.17258700 | -0.01480200 | -2.45388700 |
| H | 3.21920100 | -1.40915500 | -2.78589300 |

**R1**

|    |             |             |             |
|----|-------------|-------------|-------------|
| C  | -2.84993400 | -1.07612800 | 0.74673600  |
| C  | -1.51294500 | -1.29589100 | 0.43096500  |
| C  | -0.81828100 | -0.40608500 | -0.39149900 |
| C  | -1.48878100 | 0.70961500  | -0.89456800 |
| C  | -2.82655600 | 0.93236400  | -0.58144100 |
| C  | -3.50986200 | 0.04052100  | 0.24017400  |
| H  | -3.37836400 | -1.77959200 | 1.38232600  |
| H  | -1.00210100 | -2.17436500 | 0.81950800  |
| H  | -0.95539900 | 1.40707400  | -1.53455500 |
| H  | -3.33561900 | 1.80342100  | -0.98160000 |
| H  | -4.55370000 | 0.21288900  | 0.48183200  |
| C  | 3.01322300  | -0.54620700 | 0.18889800  |
| O  | 3.31870200  | -1.46028900 | -0.52977400 |
| H  | 3.76516800  | 0.02679800  | 0.76573000  |
| C  | 1.56840500  | -0.10300500 | 0.38552700  |
| H  | 1.23858700  | -0.43698000 | 1.37633900  |
| C1 | 1.56534300  | 1.69545600  | 0.45876700  |
| C  | 0.63954000  | -0.63913900 | -0.69765800 |
| H  | 0.92125200  | -0.18548200 | -1.65290700 |
| H  | 0.85087200  | -1.71048100 | -0.78032200 |

**R2**

|   |             |             |             |
|---|-------------|-------------|-------------|
| C | -2.55174400 | 0.69528100  | -0.00010800 |
| C | -3.01311600 | -0.63935700 | 0.00004100  |
| C | -4.37637200 | -0.93653100 | 0.00014100  |
| C | -5.27544800 | 0.11883500  | 0.00008800  |
| C | -4.82874700 | 1.45001800  | -0.00006600 |
| C | -3.47709100 | 1.74685400  | -0.00016700 |
| H | -4.72291200 | -1.96429000 | 0.00025200  |
| H | -6.34034800 | -0.08861600 | 0.00016300  |
| H | -5.55521400 | 2.25585700  | -0.00011100 |
| H | -3.11410100 | 2.76871200  | -0.00029000 |
| N | -1.17920100 | 0.84842500  | -0.00019200 |
| S | -1.64693600 | -1.71603600 | 0.00005400  |
| C | -0.59423700 | -0.30444400 | -0.00010400 |
| N | 0.77070400  | -0.56961600 | -0.00018700 |
| C | 1.56159900  | 0.43895700  | 0.00027500  |

|   |            |             |             |
|---|------------|-------------|-------------|
| H | 1.17206900 | 1.46365100  | 0.00075400  |
| C | 3.01638400 | 0.27342400  | 0.00014500  |
| C | 3.60254200 | -0.99914500 | -0.00002700 |
| C | 3.82970500 | 1.41063000  | 0.00018900  |
| C | 4.98358000 | -1.12394300 | -0.00014900 |
| H | 2.95465200 | -1.86923400 | -0.00006100 |
| C | 5.21436900 | 1.28255500  | 0.00005400  |
| H | 3.37048500 | 2.39579000  | 0.00032600  |
| C | 5.79099300 | 0.01560600  | -0.00011400 |
| H | 5.43798500 | -2.10941100 | -0.00029000 |
| H | 5.84183300 | 2.16754400  | 0.00007100  |
| H | 6.87148900 | -0.08752100 | -0.00022100 |

### H<sub>2</sub>O

|   |            |             |             |
|---|------------|-------------|-------------|
| O | 0.00000000 | 0.00000000  | 0.11780500  |
| H | 0.00000000 | 0.76028500  | -0.47122100 |
| H | 0.00000000 | -0.76028500 | -0.47122100 |

### DABCO

|   |             |             |             |
|---|-------------|-------------|-------------|
| C | 0.77935000  | -0.08884800 | -1.37397900 |
| C | -0.77935000 | -0.08884800 | -1.37397900 |
| H | 1.18085600  | 0.75971400  | -1.93836800 |
| H | 1.18113200  | -1.00314900 | -1.82404200 |
| H | -1.18085600 | 0.75971300  | -1.93836800 |
| H | -1.18113200 | -1.00314900 | -1.82404300 |
| C | 0.77917800  | 1.23448000  | 0.61003800  |
| H | 1.18104300  | 1.29933200  | 1.62691800  |
| H | 1.18067300  | 2.08141400  | 0.04282200  |
| C | -0.77917900 | 1.23448000  | 0.61003800  |
| H | -1.18104400 | 1.29933200  | 1.62691800  |
| H | -1.18067300 | 2.08141300  | 0.04282200  |
| C | -0.77942400 | -1.14569600 | 0.76395200  |
| H | -1.18101200 | -1.07799600 | 1.78078400  |
| H | -1.18110300 | -2.05852500 | 0.31087000  |
| C | 0.77942400  | -1.14569600 | 0.76395200  |
| H | 1.18101200  | -1.07799600 | 1.78078400  |
| H | 1.18110400  | -2.05852500 | 0.31087000  |
| N | 1.28403600  | -0.00005800 | 0.00013500  |
| N | -1.28403600 | -0.00005900 | 0.00013500  |

### DABCO·H<sup>+</sup>

|   |             |            |             |
|---|-------------|------------|-------------|
| C | 0.81476000  | 1.21767300 | -0.64820500 |
| C | -0.73171700 | 1.32576300 | -0.53647200 |
| H | 1.28548800  | 2.08181400 | -0.17485000 |

|   |             |             |             |
|---|-------------|-------------|-------------|
| H | 1.12463800  | 1.20025700  | -1.69532000 |
| H | -1.05866400 | 2.09311400  | 0.16818200  |
| H | -1.22469700 | 1.49085400  | -1.49632800 |
| C | 0.81599600  | -0.05105000 | 1.37778300  |
| H | 1.28344800  | -0.89453500 | 1.88986700  |
| H | 1.12992900  | 0.86329800  | 1.88580200  |
| C | -0.73121600 | -0.19499600 | 1.41673000  |
| H | -1.06229600 | -1.18763600 | 1.72883800  |
| H | -1.22021200 | 0.55518800  | 2.04088600  |
| C | -0.73763500 | -1.12642500 | -0.87639300 |
| H | -1.23073900 | -2.03939300 | -0.53747500 |
| H | -1.06859600 | -0.89943700 | -1.89204500 |
| C | 0.80943500  | -1.17144400 | -0.73391000 |
| H | 1.11966100  | -2.06984600 | -0.19581900 |
| H | 1.27545800  | -1.19589800 | -1.72104900 |
| N | 1.28705500  | -0.00263600 | -0.00260200 |
| N | -1.22229500 | 0.00261500  | 0.00231800  |
| H | -2.24447500 | 0.00524200  | 0.00409500  |

**re-TS1**

|   |             |             |             |
|---|-------------|-------------|-------------|
| C | 0.07518100  | -1.16391100 | -0.22638000 |
| C | -0.70652700 | -3.03293600 | -1.14196500 |
| C | -1.93891200 | -3.82193400 | -1.45933400 |
| C | -3.04783200 | -2.74256100 | -1.32125600 |
| C | -2.47239100 | -1.63147200 | -0.40854900 |
| H | -1.90736200 | -4.28124800 | -2.44808900 |
| H | -2.05578000 | -4.61952900 | -0.71956200 |
| H | -3.98006100 | -3.14538600 | -0.92443000 |
| H | -2.65861200 | -1.82290400 | 0.65338800  |
| N | 0.58022100  | -3.21449900 | -1.13896300 |
| N | 1.03785100  | -2.03657100 | -0.57423900 |
| N | -1.03636400 | -1.81749400 | -0.61795000 |
| H | -3.26049500 | -2.31279900 | -2.30570700 |
| C | 2.42705100  | -1.88925300 | -0.25614700 |
| C | 3.27524800  | -1.26135500 | -1.16904000 |
| C | 2.86717100  | -2.39057800 | 0.97223600  |
| C | 4.61101100  | -1.10674600 | -0.80321700 |
| C | 4.21133300  | -2.21107700 | 1.29342700  |
| C | 5.09141400  | -1.56476000 | 0.42462500  |
| H | 5.29402600  | -0.62228300 | -1.49695000 |
| H | 4.58002400  | -2.58838800 | 2.24405100  |
| C | -2.92626700 | -0.21286800 | -0.73657300 |
| H | -2.90249600 | -0.05773000 | -1.82159600 |
| H | -2.20896800 | 0.47239500  | -0.27710800 |

|    |             |             |             |
|----|-------------|-------------|-------------|
| C  | -4.29919300 | 0.04967000  | -0.17046800 |
| C  | -5.44037700 | 0.03401300  | -0.97101400 |
| C  | -4.42629500 | 0.26719700  | 1.20570900  |
| C  | -6.69896500 | 0.23732300  | -0.40829100 |
| H  | -5.34243100 | -0.13125300 | -2.04155800 |
| C  | -5.68271200 | 0.47000400  | 1.76576300  |
| H  | -3.52505200 | 0.27068100  | 1.81818000  |
| C  | -6.82109900 | 0.45553000  | 0.96031600  |
| H  | -7.58201200 | 0.22844100  | -1.03951800 |
| H  | -5.77520000 | 0.64334600  | 2.83330100  |
| H  | -7.80044900 | 0.61622000  | 1.39987800  |
| C  | 6.53186200  | -1.34922300 | 0.81058000  |
| H  | 6.65780500  | -0.37945600 | 1.30285600  |
| H  | 6.87609200  | -2.11937400 | 1.50446900  |
| H  | 7.18243800  | -1.36079300 | -0.06706200 |
| C  | 2.75828300  | -0.78752100 | -2.50087800 |
| H  | 2.20319000  | -1.58272600 | -3.00636300 |
| H  | 2.07977600  | 0.06286800  | -2.38128300 |
| H  | 3.58264800  | -0.47488300 | -3.14404300 |
| C  | 1.92070700  | -3.12557600 | 1.88571900  |
| H  | 1.03054400  | -2.53237400 | 2.12227400  |
| H  | 1.57622500  | -4.04833700 | 1.40806300  |
| H  | 2.41639300  | -3.38539600 | 2.82241900  |
| C  | 0.33266500  | 5.17262500  | -1.54337500 |
| C  | 0.18086000  | 3.82342800  | -1.24210000 |
| C  | 1.18740900  | 3.12166700  | -0.57442600 |
| C  | 2.35232600  | 3.79909000  | -0.21445800 |
| C  | 2.51041300  | 5.14857700  | -0.51705900 |
| C  | 1.50133600  | 5.83886200  | -1.18238700 |
| H  | -0.45914900 | 5.70319800  | -2.06282200 |
| H  | -0.73063200 | 3.30259000  | -1.52906700 |
| H  | 3.13578500  | 3.26282700  | 0.31396200  |
| H  | 3.42262400  | 5.66265800  | -0.23077900 |
| H  | 1.62440000  | 6.89101900  | -1.41837200 |
| C  | -0.06271700 | -0.06299600 | 1.38944600  |
| O  | -1.11145900 | -0.46285800 | 1.93254800  |
| H  | 0.93376700  | -0.40639200 | 1.74732300  |
| C  | 0.05175000  | 1.40555100  | 0.92767900  |
| H  | -0.94878400 | 1.80191300  | 0.73728900  |
| Cl | 0.63020000  | 2.29484900  | 2.39594200  |
| C  | 0.99376900  | 1.66344600  | -0.24283700 |
| H  | 1.95586700  | 1.17650200  | -0.03409100 |
| H  | 0.55318800  | 1.15367400  | -1.10686600 |

**si-TS1**

|   |             |             |             |
|---|-------------|-------------|-------------|
| C | -0.63902000 | -0.92656900 | 0.29268700  |
| C | -1.93303100 | -2.65005600 | -0.28454200 |
| C | -3.34247300 | -3.12334800 | -0.44812700 |
| C | -4.12289300 | -2.06328800 | 0.37757400  |
| C | -3.23256400 | -0.79344000 | 0.42111300  |
| H | -3.61969800 | -3.10522700 | -1.50674400 |
| H | -3.49187800 | -4.13887900 | -0.08002000 |
| H | -4.26639000 | -2.43496300 | 1.39476400  |
| H | -3.26890800 | -0.31229000 | 1.40254100  |
| N | -0.73189600 | -3.08371300 | -0.51349900 |
| N | 0.04520300  | -2.00026200 | -0.14057100 |
| N | -1.90914500 | -1.37465700 | 0.20973500  |
| H | -5.10713900 | -1.84218900 | -0.03949000 |
| C | 1.47489500  | -2.06583300 | -0.24242500 |
| C | 2.07418100  | -1.59619100 | -1.41254000 |
| C | 2.20536400  | -2.53114500 | 0.85412100  |
| C | 3.46800400  | -1.57061500 | -1.45945300 |
| C | 3.59482300  | -2.49606900 | 0.75536400  |
| C | 4.23950800  | -2.01096800 | -0.38495100 |
| H | 3.95804400  | -1.18613500 | -2.35027800 |
| H | 4.18928400  | -2.84543600 | 1.59663900  |
| C | -3.53235700 | 0.24094500  | -0.67276900 |
| H | -3.52616400 | -0.26425100 | -1.64656500 |
| H | -2.71045100 | 0.96718100  | -0.67901800 |
| C | -4.85285000 | 0.93001100  | -0.44066200 |
| C | -5.98952500 | 0.58199600  | -1.17256700 |
| C | -4.96505400 | 1.91096200  | 0.54907000  |
| C | -7.21373800 | 1.19718900  | -0.92230700 |
| H | -5.91007000 | -0.17038800 | -1.95399900 |
| C | -6.18582000 | 2.52683100  | 0.80282000  |
| H | -4.08214000 | 2.19929600  | 1.11566400  |
| C | -7.31446300 | 2.16983900  | 0.06743200  |
| H | -8.08689100 | 0.91929400  | -1.50398600 |
| H | -6.25696800 | 3.29025800  | 1.57095600  |
| H | -8.26667300 | 2.65247000  | 0.26200900  |
| C | 5.74498200  | -1.95573900 | -0.43554000 |
| H | 6.17885100  | -2.95579600 | -0.34111700 |
| H | 6.09526600  | -1.52163800 | -1.37462100 |
| H | 6.13952400  | -1.35167500 | 0.38838800  |
| C | 1.23101000  | -1.10359300 | -2.55780800 |
| H | 0.51443400  | -1.87029700 | -2.86788100 |
| H | 0.66101000  | -0.21494400 | -2.26641600 |
| H | 1.85634500  | -0.84336800 | -3.41327600 |

|    |              |              |              |
|----|--------------|--------------|--------------|
| C  | 1. 50504400  | -3. 02239100 | 2. 09095700  |
| H  | 1. 01267200  | -2. 18281600 | 2. 59293600  |
| H  | 0. 74637000  | -3. 76822200 | 1. 83580300  |
| H  | 2. 21983300  | -3. 47589600 | 2. 78023600  |
| C  | 5. 31709200  | 1. 84849400  | -0. 32593300 |
| C  | 4. 20437500  | 1. 53864600  | 0. 44804300  |
| C  | 3. 21123100  | 2. 49425400  | 0. 68624200  |
| C  | 3. 35644200  | 3. 76606600  | 0. 13372000  |
| C  | 4. 47280200  | 4. 08169200  | -0. 63793000 |
| C  | 5. 45515500  | 3. 12427300  | -0. 87026600 |
| H  | 6. 08066300  | 1. 09593200  | -0. 50041400 |
| H  | 4. 09389300  | 0. 54075700  | 0. 87043800  |
| H  | 2. 58374900  | 4. 51099400  | 0. 30374200  |
| H  | 4. 57272600  | 5. 07643500  | -1. 06104100 |
| H  | 6. 32471000  | 3. 37032800  | -1. 47148500 |
| C  | 0. 01952300  | 0. 52869500  | 1. 60745900  |
| O  | 0. 40853400  | -0. 04380400 | 2. 62749300  |
| H  | -0. 96752700 | 1. 04148600  | 1. 56619100  |
| C  | 1. 06757500  | 1. 18581600  | 0. 68990400  |
| H  | 1. 67090300  | 0. 41803300  | 0. 20450200  |
| Cl | 0. 23613600  | 2. 08696400  | -0. 63910400 |
| C  | 1. 98894100  | 2. 10963800  | 1. 48140400  |
| H  | 1. 43570800  | 2. 99335200  | 1. 81625500  |
| H  | 2. 27224200  | 1. 53445600  | 2. 36991200  |

**re-1**

|   |              |              |              |
|---|--------------|--------------|--------------|
| C | 0. 13364300  | -0. 89168300 | 0. 03334800  |
| C | -0. 73432700 | -2. 30475300 | -1. 40113700 |
| C | -1. 98667700 | -2. 93515300 | -1. 92239800 |
| C | -3. 07152100 | -1. 96297400 | -1. 39319900 |
| C | -2. 45493800 | -1. 21148200 | -0. 18926200 |
| H | -1. 98947200 | -3. 03667400 | -3. 00832400 |
| H | -2. 08537300 | -3. 93505500 | -1. 48999000 |
| H | -3. 99359300 | -2. 47086300 | -1. 11046100 |
| H | -2. 55330600 | -1. 75972800 | 0. 75299400  |
| N | 0. 53972300  | -2. 55886900 | -1. 45118000 |
| N | 1. 06639600  | -1. 65183400 | -0. 55549600 |
| N | -1. 01963000 | -1. 29274700 | -0. 53075700 |
| H | -3. 31847600 | -1. 23251400 | -2. 17065200 |
| C | 2. 44817900  | -1. 72964900 | -0. 17358300 |
| C | 3. 42689900  | -1. 23116100 | -1. 03276300 |
| C | 2. 73652500  | -2. 33783400 | 1. 05528000  |
| C | 4. 75273700  | -1. 32030800 | -0. 60781800 |
| C | 4. 07507200  | -2. 39147700 | 1. 43407100  |

|   |             |             |             |
|---|-------------|-------------|-------------|
| C | 5.09131100  | -1.88117100 | 0.62247500  |
| H | 5.53784000  | -0.94195500 | -1.25747500 |
| H | 4.33263700  | -2.85469500 | 2.38323000  |
| C | -2.99551200 | 0.19710500  | 0.02549600  |
| H | -2.92339600 | 0.77408300  | -0.90452300 |
| H | -2.38585100 | 0.65756400  | 0.80622100  |
| C | -4.42208700 | 0.10914700  | 0.51048200  |
| C | -5.51194900 | 0.26691600  | -0.34550000 |
| C | -4.64942700 | -0.18509400 | 1.85876500  |
| C | -6.81294300 | 0.13414800  | 0.13548600  |
| H | -5.34132000 | 0.50707100  | -1.39244200 |
| C | -5.94754300 | -0.31975500 | 2.33897900  |
| H | -3.79072600 | -0.29285100 | 2.51899700  |
| C | -7.03224500 | -0.16125300 | 1.47771400  |
| H | -7.65438000 | 0.26651000  | -0.53739400 |
| H | -6.11460300 | -0.54098800 | 3.38834500  |
| H | -8.04534700 | -0.26147600 | 1.85376800  |
| C | 6.52622700  | -1.93164300 | 1.07901900  |
| H | 7.21458200  | -1.82558900 | 0.23803200  |
| H | 6.73379900  | -1.12150100 | 1.78525500  |
| H | 6.74545300  | -2.87409300 | 1.58677300  |
| C | 3.07058800  | -0.62875200 | -2.36689900 |
| H | 2.33616100  | -1.24351800 | -2.89265000 |
| H | 2.64721400  | 0.37578700  | -2.25302000 |
| H | 3.96080700  | -0.54013500 | -2.99191000 |
| C | 1.64670600  | -2.94668900 | 1.90236600  |
| H | 0.89034900  | -2.22162800 | 2.22972000  |
| H | 1.12462400  | -3.72425100 | 1.33351300  |
| H | 2.07933500  | -3.41288500 | 2.78901900  |
| C | 0.90952500  | 4.16732200  | -2.77567500 |
| C | 1.01061800  | 3.03467500  | -1.97421900 |
| C | 1.42956100  | 3.13121600  | -0.64434400 |
| C | 1.73933000  | 4.39070300  | -0.12910700 |
| C | 1.63903400  | 5.52694400  | -0.92726100 |
| C | 1.22602700  | 5.41860100  | -2.25241900 |
| H | 0.58656000  | 4.07419900  | -3.80786700 |
| H | 0.75771700  | 2.05677900  | -2.38145600 |
| H | 2.05337500  | 4.47571900  | 0.90725900  |
| H | 1.88318500  | 6.49973700  | -0.51235000 |
| H | 1.15061700  | 6.30454300  | -2.87455100 |
| C | 0.17753700  | -0.00279400 | 1.31265300  |
| O | -0.80099400 | -0.44048600 | 2.07005700  |
| H | 1.21971600  | -0.13461400 | 1.70504500  |
| C | 0.14965000  | 1.48045800  | 0.80401200  |

|    |             |            |             |
|----|-------------|------------|-------------|
| H  | -0.64043000 | 1.62261000 | 0.06110300  |
| Cl | -0.29129100 | 2.55457100 | 2.17205100  |
| C  | 1.49727100  | 1.89593400 | 0.21474800  |
| H  | 2.21218900  | 2.02329800 | 1.03354900  |
| H  | 1.85927500  | 1.05248600 | -0.38854100 |

**si-1**

|   |             |             |             |
|---|-------------|-------------|-------------|
| C | -0.52734700 | -0.91111400 | 0.33688700  |
| C | -1.74697600 | -2.55906800 | -0.45890000 |
| C | -3.13406400 | -3.06266000 | -0.70001000 |
| C | -3.95609300 | -2.14897700 | 0.24862100  |
| C | -3.13978400 | -0.84025000 | 0.41279100  |
| H | -3.40526600 | -2.91503200 | -1.75008000 |
| H | -3.24114000 | -4.12273600 | -0.46935100 |
| H | -4.05387900 | -2.63554400 | 1.22182800  |
| H | -3.19581200 | -0.44785700 | 1.43126300  |
| N | -0.52597300 | -2.93465500 | -0.68642600 |
| N | 0.22318100  | -1.89686300 | -0.18071000 |
| N | -1.78408300 | -1.34339100 | 0.16420300  |
| H | -4.95900300 | -1.93978600 | -0.12710000 |
| C | 1.66125000  | -1.97172000 | -0.20239200 |
| C | 2.32708300  | -1.50361300 | -1.33617700 |
| C | 2.31744500  | -2.50960700 | 0.90875400  |
| C | 3.72125200  | -1.51446700 | -1.31119900 |
| C | 3.71024600  | -2.50353100 | 0.87912200  |
| C | 4.42479400  | -1.99525000 | -0.20781100 |
| H | 4.26520100  | -1.12985500 | -2.17005000 |
| H | 4.25111900  | -2.90340900 | 1.73371000  |
| C | -3.49562900 | 0.25931000  | -0.59684200 |
| H | -3.45385500 | -0.16232100 | -1.60872000 |
| H | -2.72675400 | 1.03801300  | -0.53903100 |
| C | -4.86071300 | 0.83549800  | -0.31700400 |
| C | -5.96970900 | 0.47684700  | -1.08526800 |
| C | -5.03849400 | 1.71854800  | 0.75165500  |
| C | -7.23230400 | 0.98658700  | -0.79298400 |
| H | -5.83966900 | -0.19965900 | -1.92710500 |
| C | -6.29795700 | 2.22870800  | 1.04714600  |
| H | -4.17729400 | 2.01485700  | 1.34676100  |
| C | -7.39882700 | 1.86239800  | 0.27513300  |
| H | -8.08415200 | 0.70302100  | -1.40274900 |
| H | -6.41998700 | 2.91870600  | 1.87580200  |
| H | -8.38110600 | 2.26350800  | 0.50256800  |
| C | 5.93137200  | -1.96991500 | -0.17710600 |
| H | 6.33931600  | -2.97490500 | -0.03441500 |



|    |             |             |             |
|----|-------------|-------------|-------------|
| H  | 6.34109900  | -1.56459200 | -1.10474300 |
| H  | 6.28977900  | -1.35231700 | 0.65257500  |
| C  | 1.56441500  | -0.98775300 | -2.52726500 |
| H  | 0.84152600  | -1.73127000 | -2.87654000 |
| H  | 1.01044000  | -0.07429400 | -2.28476700 |
| H  | 2.24759400  | -0.75843200 | -3.34651400 |
| C  | 1.54334700  | -3.06703300 | 2.06800600  |
| H  | 0.97732100  | -2.24795100 | 2.52798000  |
| H  | 0.84719200  | -3.84026000 | 1.72581500  |
| H  | 2.21915000  | -3.51161100 | 2.80083500  |
| C  | 5.11964500  | 2.07673400  | -0.11491800 |
| C  | 3.93891700  | 1.71858900  | 0.52422500  |
| C  | 2.89116500  | 2.63700100  | 0.65963800  |
| C  | 3.05454400  | 3.92144800  | 0.14406000  |
| C  | 4.24066700  | 4.28645000  | -0.49073000 |
| C  | 5.27504500  | 3.36592900  | -0.62353800 |
| H  | 5.92115600  | 1.35024000  | -0.21529800 |
| H  | 3.81338400  | 0.71210300  | 0.92249000  |
| H  | 2.24241500  | 4.63786700  | 0.23493800  |
| H  | 4.35332300  | 5.29079400  | -0.88744300 |
| H  | 6.19704300  | 3.64940700  | -1.12141000 |
| C  | -0.06957700 | 0.26542900  | 1.25058300  |
| O  | 0.50274100  | -0.24496300 | 2.31112900  |
| H  | -1.02211000 | 0.85155300  | 1.40156600  |
| C  | 0.87294100  | 1.18332100  | 0.42235500  |
| H  | 1.61253700  | 0.57015900  | -0.09442400 |
| Cl | -0.05665000 | 2.01505600  | -0.91059100 |
| C  | 1.60445100  | 2.18527900  | 1.30097200  |
| H  | 0.95102700  | 3.03040700  | 1.54023600  |
| H  | 1.80202400  | 1.63061300  | 2.22609900  |

### TS2<sup>D</sup>

|   |             |             |            |
|---|-------------|-------------|------------|
| C | -0.90187800 | 0.19049900  | 0.45441500 |
| C | -0.83705300 | -0.27093100 | 2.63259800 |
| C | -0.02969500 | -0.83657800 | 3.76252500 |
| C | 1.10105600  | -1.57501800 | 3.00183800 |
| C | 1.23371500  | -0.84471400 | 1.64325400 |
| H | 0.35706400  | -0.02064800 | 4.38141900 |
| H | -0.61300200 | -1.49483100 | 4.40739300 |
| H | 0.80283200  | -2.61271000 | 2.82550400 |
| H | 1.52468600  | -1.53477600 | 0.84162000 |
| N | -1.96503400 | 0.33701300  | 2.50418300 |
| N | -2.02661000 | 0.63725700  | 1.12826700 |
| N | -0.14038300 | -0.39405800 | 1.45610200 |

|   |              |              |              |
|---|--------------|--------------|--------------|
| H | 2. 04924800  | -1. 58693900 | 3. 54256700  |
| C | -2. 67035700 | 1. 87371900  | 0. 75854100  |
| C | -1. 99235500 | 3. 07190600  | 1. 00244300  |
| C | -3. 94366300 | 1. 85504500  | 0. 18445800  |
| C | -2. 62786800 | 4. 27103500  | 0. 67914200  |
| C | -4. 54135300 | 3. 07366200  | -0. 12300300 |
| C | -3. 90147800 | 4. 29029500  | 0. 11766100  |
| H | -2. 11275400 | 5. 20956700  | 0. 87086000  |
| H | -5. 53189600 | 3. 07285200  | -0. 57288300 |
| C | 2. 20726300  | 0. 35044500  | 1. 68751400  |
| H | 2. 02123600  | 0. 91239200  | 2. 61202800  |
| H | 1. 97412900  | 1. 02295100  | 0. 85413900  |
| C | 3. 64996600  | -0. 07556000 | 1. 59338000  |
| C | 4. 42280100  | -0. 28997300 | 2. 73648200  |
| C | 4. 22913300  | -0. 28643200 | 0. 33781400  |
| C | 5. 74413900  | -0. 71667300 | 2. 63197100  |
| H | 3. 99045000  | -0. 10377800 | 3. 71736400  |
| C | 5. 55028200  | -0. 70844000 | 0. 23119900  |
| H | 3. 65246700  | -0. 09452100 | -0. 56636600 |
| C | 6. 30985000  | -0. 92871800 | 1. 37780200  |
| H | 6. 33309300  | -0. 87547200 | 3. 52990700  |
| H | 5. 98606600  | -0. 85226900 | -0. 75254800 |
| H | 7. 34141900  | -1. 25563000 | 1. 29472800  |
| C | -4. 57711500 | 5. 58915300  | -0. 24015000 |
| H | -3. 98256200 | 6. 44784200  | 0. 07936600  |
| H | -4. 72544200 | 5. 66571500  | -1. 32177700 |
| H | -5. 56203800 | 5. 66347400  | 0. 23020600  |
| C | -0. 60369500 | 3. 07378800  | 1. 58827700  |
| H | -0. 56717400 | 2. 50776400  | 2. 52480500  |
| H | 0. 11075900  | 2. 61339800  | 0. 89544400  |
| H | -0. 27028700 | 4. 09394800  | 1. 78911800  |
| C | -4. 61207700 | 0. 55195400  | -0. 13785300 |
| H | -3. 98900700 | 0. 05262400  | -0. 89002700 |
| H | -4. 68022100 | -0. 08237500 | 0. 75190100  |
| H | -5. 61764600 | 0. 71287000  | -0. 53204200 |
| C | 4. 12956000  | 2. 81106000  | -1. 27507100 |
| C | 2. 76279900  | 2. 55993300  | -1. 36227100 |
| C | 2. 25027900  | 1. 66604200  | -2. 30881100 |
| C | 3. 14424500  | 1. 04416600  | -3. 18705400 |
| C | 4. 51207100  | 1. 29301900  | -3. 10259400 |
| C | 5. 01014300  | 2. 17196300  | -2. 14288600 |
| H | 4. 50647000  | 3. 50329800  | -0. 52876100 |
| H | 2. 07597800  | 3. 06698600  | -0. 68716700 |
| H | 2. 76051200  | 0. 35333100  | -3. 93165500 |

|    |             |             |             |
|----|-------------|-------------|-------------|
| H  | 5.19137100  | 0.80045000  | -3.79194000 |
| H  | 6.07680900  | 2.36057300  | -2.07497800 |
| C  | -0.88133200 | -0.03374800 | -0.97040400 |
| O  | -1.86210200 | 0.34087900  | -1.73166200 |
| H  | -1.11852100 | -1.32773900 | -0.63453800 |
| C  | 0.53253300  | 0.01091300  | -1.53511200 |
| H  | 1.29273500  | -0.12403100 | -0.76649500 |
| Cl | 0.84714000  | -1.41537700 | -2.66319900 |
| C  | 0.78399300  | 1.31816900  | -2.29573000 |
| H  | 0.35347200  | 1.23172200  | -3.29560400 |
| H  | 0.20841400  | 2.09471200  | -1.77808100 |
| C  | -0.73309900 | -3.70859500 | -0.33299700 |
| C  | -1.50688700 | -5.05038100 | -0.48218700 |
| H  | 0.09960900  | -3.61927600 | -1.03584000 |
| H  | -0.34318500 | -3.57168700 | 0.68250900  |
| H  | -1.20234600 | -5.57723400 | -1.39171400 |
| H  | -1.30971400 | -5.71245300 | 0.36660900  |
| C  | -2.33444000 | -2.80832000 | -1.90860100 |
| H  | -2.86279600 | -1.88213700 | -2.14817200 |
| H  | -1.53919700 | -2.92755700 | -2.64828000 |
| C  | -3.23516500 | -4.06802700 | -1.80364200 |
| H  | -4.29574800 | -3.79792400 | -1.79414900 |
| H  | -3.07273300 | -4.73891700 | -2.65262900 |
| C  | -3.34794000 | -3.97331400 | 0.57600600  |
| H  | -4.43912400 | -3.89829900 | 0.59335800  |
| H  | -3.03635000 | -4.48537200 | 1.49230800  |
| C  | -2.70031900 | -2.56655300 | 0.46835400  |
| H  | -3.41822600 | -1.79389000 | 0.18898300  |
| H  | -2.22214200 | -2.25133800 | 1.40269900  |
| N  | -1.67348600 | -2.60295700 | -0.59532900 |
| N  | -2.94843200 | -4.80283300 | -0.56398800 |

**TS2<sup>B</sup>**

|   |             |             |             |
|---|-------------|-------------|-------------|
| C | -0.53751600 | -0.71455100 | -0.32859800 |
| C | -1.66792000 | -2.53365600 | 0.21849000  |
| C | -2.99031900 | -3.08589800 | 0.64898000  |
| C | -3.70070000 | -1.80245900 | 1.15694000  |
| C | -3.07868700 | -0.62342000 | 0.36777100  |
| H | -3.50510500 | -3.52449200 | -0.21163000 |
| H | -2.89268300 | -3.85737100 | 1.41293700  |
| H | -3.49617700 | -1.67630100 | 2.22302000  |
| H | -2.95644900 | 0.27790500  | 0.96382000  |
| N | -0.48495100 | -2.98761000 | -0.04364000 |
| N | 0.22201400  | -1.84886800 | -0.39508800 |

|   |             |             |             |
|---|-------------|-------------|-------------|
| N | -1.74986400 | -1.17795600 | 0.07167900  |
| H | -4.78373700 | -1.83449900 | 1.02240600  |
| C | 1.62187400  | -1.92641100 | -0.66699300 |
| C | 2.07052300  | -1.71280600 | -1.97209500 |
| C | 2.49376400  | -2.13538900 | 0.40834100  |
| C | 3.44969600  | -1.68343400 | -2.18206300 |
| C | 3.85988700  | -2.10712500 | 0.14649800  |
| C | 4.35463000  | -1.86729300 | -1.13841500 |
| H | 3.82223800  | -1.49862000 | -3.18617900 |
| H | 4.55720200  | -2.25172300 | 0.96880300  |
| C | -3.83246800 | -0.27954300 | -0.92297300 |
| H | -4.11840000 | -1.20187700 | -1.44413400 |
| H | -3.14711100 | 0.28822100  | -1.55631800 |
| C | -5.03930200 | 0.56910400  | -0.61271700 |
| C | -6.33616500 | 0.05886500  | -0.64965200 |
| C | -4.83851100 | 1.90306600  | -0.23985200 |
| C | -7.42363500 | 0.86691600  | -0.32131400 |
| H | -6.49758100 | -0.97453600 | -0.94846300 |
| C | -5.92304600 | 2.70868600  | 0.08714100  |
| H | -3.82056000 | 2.29016700  | -0.21904800 |
| C | -7.21813700 | 2.19214100  | 0.04793200  |
| H | -8.42966500 | 0.46098600  | -0.35785700 |
| H | -5.76006300 | 3.74394500  | 0.36957400  |
| H | -8.06384800 | 2.82335900  | 0.30124300  |
| C | 5.83948800  | -1.77244900 | -1.37260300 |
| H | 6.37516200  | -2.56302100 | -0.84082200 |
| H | 6.08017600  | -1.84762900 | -2.43481100 |
| H | 6.21972600  | -0.81226200 | -1.00926100 |
| C | 1.09649100  | -1.47124400 | -3.09247600 |
| H | 0.30481200  | -2.22608200 | -3.09078600 |
| H | 0.62206200  | -0.48920600 | -2.98224600 |
| H | 1.60541700  | -1.49868900 | -4.05706900 |
| C | 1.95814300  | -2.33058600 | 1.80141200  |
| H | 1.28965300  | -1.50693200 | 2.07888700  |
| H | 1.37732500  | -3.25399500 | 1.87341900  |
| H | 2.77324400  | -2.36845600 | 2.52642400  |
| C | 4.81855700  | 1.76714300  | 1.89895600  |
| C | 3.49882700  | 1.43562500  | 1.61283600  |
| C | 2.59241400  | 2.40701200  | 1.17673400  |
| C | 3.03843000  | 3.72069900  | 1.03381100  |
| C | 4.35817900  | 4.05895100  | 1.32344200  |
| C | 5.25171800  | 3.08390800  | 1.75670600  |
| H | 5.50864700  | 0.99956900  | 2.23667200  |
| H | 3.16350000  | 0.40527400  | 1.72166100  |

|    |             |            |             |
|----|-------------|------------|-------------|
| H  | 2.34459900  | 4.47907300 | 0.68241100  |
| H  | 4.68932400  | 5.08607300 | 1.20673500  |
| H  | 6.28020000  | 3.34728400 | 1.98214600  |
| C  | -0.27338500 | 0.64361000 | -0.68022500 |
| O  | -1.36292100 | 1.55405100 | -0.42109200 |
| H  | -0.92269600 | 1.03207500 | -1.57406500 |
| C  | 1.10749400  | 1.20490300 | -0.47150800 |
| H  | 1.87530700  | 0.43156900 | -0.46578100 |
| Cl | 1.57644300  | 2.27701600 | -1.87332600 |
| C  | 1.18131900  | 2.01392000 | 0.82545300  |
| H  | 0.51627400  | 2.87437700 | 0.73224800  |
| H  | 0.76361700  | 1.37008600 | 1.61243200  |

**TS2<sup>W</sup>**

**TS2**

|     |             |             |             |
|-----|-------------|-------------|-------------|
| 2 C | -0.50249400 | -0.82372800 | 0.30198400  |
| C   | -1.85666400 | -2.54902000 | 0.13753000  |
| C   | -3.27111900 | -3.02649800 | 0.24147000  |
| C   | -3.92748400 | -1.83378700 | 0.98828900  |
| C   | -3.11039100 | -0.58515000 | 0.57661800  |
| H   | -3.69433800 | -3.16563500 | -0.75830800 |
| H   | -3.35107900 | -3.97199800 | 0.77837300  |
| H   | -3.83877600 | -1.99062600 | 2.06640900  |
| H   | -3.03544000 | 0.17906800  | 1.35211800  |
| N   | -0.68566200 | -3.05063800 | -0.11382700 |
| N   | 0.15300400  | -1.96338500 | 0.00136000  |
| N   | -1.78918900 | -1.21172500 | 0.38666500  |
| H   | -4.98335300 | -1.70882100 | 0.74372700  |
| C   | 1.57211000  | -2.17787400 | -0.02040200 |
| C   | 2.18112200  | -2.49687600 | -1.23509100 |
| C   | 2.27006400  | -2.09535200 | 1.18845200  |
| C   | 3.56116400  | -2.68689100 | -1.22625600 |
| C   | 3.64961100  | -2.28540700 | 1.14026100  |
| C   | 4.31047000  | -2.56829900 | -0.05601600 |
| H   | 4.06361500  | -2.92276100 | -2.16084000 |
| H   | 4.22061400  | -2.21878500 | 2.06321600  |
| C   | -3.59644400 | 0.04891900  | -0.73515700 |
| H   | -3.64612400 | -0.72543000 | -1.51178800 |
| H   | -2.86695300 | 0.81121400  | -1.02092000 |
| C   | -4.94933200 | 0.68979000  | -0.54044200 |
| C   | -6.11036800 | 0.10548100  | -1.04913500 |
| C   | -5.04494200 | 1.87802500  | 0.19277900  |
| C   | -7.35471600 | 0.69442600  | -0.83363500 |

|    |             |             |             |
|----|-------------|-------------|-------------|
| H  | -6.03875100 | -0.81392000 | -1.62723100 |
| C  | -6.28914200 | 2.46259100  | 0.40824400  |
| H  | -4.12232900 | 2.32300700  | 0.56658200  |
| C  | -7.44546200 | 1.87444900  | -0.10219700 |
| H  | -8.24994600 | 0.23361300  | -1.23961300 |
| H  | -6.35751300 | 3.38675300  | 0.97426600  |
| H  | -8.41331600 | 2.33638300  | 0.06620700  |
| C  | 5.80885200  | -2.72083900 | -0.08411500 |
| H  | 6.18248400  | -3.13876200 | 0.85364900  |
| H  | 6.12623200  | -3.37086600 | -0.90249900 |
| H  | 6.28855500  | -1.74723700 | -0.22801700 |
| C  | 1.37084100  | -2.63345300 | -2.49421800 |
| H  | 0.71942400  | -3.51067800 | -2.44036000 |
| H  | 0.73697400  | -1.75427600 | -2.64090400 |
| H  | 2.02580600  | -2.73541800 | -3.36105700 |
| C  | 1.56035100  | -1.81353500 | 2.48744600  |
| H  | 1.17646600  | -0.78827100 | 2.54162200  |
| H  | 0.70347400  | -2.48385700 | 2.61202900  |
| H  | 2.23888100  | -1.97079600 | 3.32774500  |
| C  | 5.37350400  | 2.82100700  | 0.78683500  |
| C  | 4.06758200  | 2.44213200  | 1.07953300  |
| C  | 3.00308900  | 2.86434900  | 0.27876600  |
| C  | 3.27496800  | 3.67387000  | -0.82457200 |
| C  | 4.58006300  | 4.05778000  | -1.12019900 |
| C  | 5.63273900  | 3.63269900  | -0.31503000 |
| H  | 6.18903700  | 2.48914300  | 1.42206500  |
| H  | 3.86424400  | 1.81304900  | 1.94389800  |
| H  | 2.45396700  | 3.99827800  | -1.45815900 |
| H  | 4.77537200  | 4.68918300  | -1.98140400 |
| H  | 6.65039700  | 3.93326300  | -0.54345000 |
| C  | -0.08201700 | 0.56017900  | 0.57102700  |
| O  | -0.35266700 | 0.83069600  | 1.94191600  |
| H  | -0.96849800 | 1.39125000  | 0.12339800  |
| C  | 1.32125200  | 0.97748500  | 0.16329700  |
| H  | 2.12869700  | 0.33404200  | 0.52781400  |
| Cl | 1.43143600  | 0.84386100  | -1.64911400 |
| C  | 1.59921300  | 2.41732700  | 0.59414800  |
| H  | 0.85568900  | 3.07350600  | 0.12984800  |
| H  | 1.42644200  | 2.44346600  | 1.67501100  |
| O  | -1.92460200 | 2.25624900  | 0.46758700  |
| H  | -0.99023800 | 1.58216600  | 1.85327100  |
| H  | -1.71157300 | 3.11699800  | 0.09154500  |

TS3

|   |             |             |             |
|---|-------------|-------------|-------------|
| C | 0.57476400  | -0.86029900 | -0.42330300 |
| C | 1.83809700  | -2.65203300 | -0.13724700 |
| C | 3.23533300  | -3.18753000 | -0.10284800 |
| C | 4.01603100  | -2.06703900 | -0.84008000 |
| C | 3.19055900  | -0.76923200 | -0.65354000 |
| H | 3.55887700  | -3.29649500 | 0.93701800  |
| H | 3.32498500  | -4.16106500 | -0.58565000 |
| H | 4.07554400  | -2.30694000 | -1.90441800 |
| H | 3.21639500  | -0.12599900 | -1.53346700 |
| N | 0.64947100  | -3.07844300 | 0.13979000  |
| N | -0.14451800 | -1.95992900 | -0.05166900 |
| N | 1.84842600  | -1.33243800 | -0.50092800 |
| H | 5.03361300  | -1.94198300 | -0.46490900 |
| C | -1.55737200 | -2.00615300 | 0.15583100  |
| C | -2.04855700 | -1.80859100 | 1.45031400  |
| C | -2.38663900 | -2.12298000 | -0.96138700 |
| C | -3.42974600 | -1.71643900 | 1.60306100  |
| C | -3.76139900 | -2.01612200 | -0.75901800 |
| C | -4.29652800 | -1.79745800 | 0.51103200  |
| H | -3.83824400 | -1.54499300 | 2.59597500  |
| H | -4.42857800 | -2.08588700 | -1.61519000 |
| C | 3.57637900  | 0.03855500  | 0.59422200  |
| H | 3.63721100  | -0.63886000 | 1.45500800  |
| H | 2.77202600  | 0.75274800  | 0.80149400  |
| C | 4.88536900  | 0.75762900  | 0.38859100  |
| C | 6.05920400  | 0.32774000  | 1.00776300  |
| C | 4.94051600  | 1.85840300  | -0.47201000 |
| C | 7.26602800  | 0.98437900  | 0.77689200  |
| H | 6.02502700  | -0.52241800 | 1.68511200  |
| C | 6.14320800  | 2.51556900  | -0.70519500 |
| H | 4.02686800  | 2.20038900  | -0.95414000 |
| C | 7.31018300  | 2.07877600  | -0.08079400 |
| H | 8.17024500  | 0.64232600  | 1.27035700  |
| H | 6.16994000  | 3.37291500  | -1.37007400 |
| H | 8.24891600  | 2.59289000  | -0.25965800 |
| C | -5.77691700 | -1.60166300 | 0.70350500  |
| H | -6.34170400 | -1.95739300 | -0.16131900 |
| H | -6.13476800 | -2.12964300 | 1.59117600  |
| H | -5.99722500 | -0.53662400 | 0.83490100  |
| C | -1.10389300 | -1.60910400 | 2.60346200  |
| H | -1.64021300 | -1.65925700 | 3.55254100  |
| H | -0.31540400 | -2.36645600 | 2.60321200  |
| H | -0.63484400 | -0.61929400 | 2.53144700  |
| C | -1.79485700 | -2.28022400 | -2.33560800 |

|    |             |             |             |
|----|-------------|-------------|-------------|
| H  | -1.05605600 | -3.08640700 | -2.35752700 |
| H  | -2.57171200 | -2.49736800 | -3.07090000 |
| H  | -1.28520000 | -1.35591900 | -2.63387100 |
| C  | -5.40291900 | 1.64648500  | -0.98426600 |
| C  | -4.06187900 | 1.55227500  | -1.34284300 |
| C  | -3.09923700 | 2.36196800  | -0.73437800 |
| C  | -3.50110300 | 3.26482500  | 0.25022100  |
| C  | -4.84280500 | 3.36294100  | 0.61005600  |
| C  | -5.79676300 | 2.55615700  | -0.00505600 |
| H  | -6.14007300 | 1.01382900  | -1.47083100 |
| H  | -3.75161400 | 0.83888800  | -2.10411000 |
| H  | -2.75085800 | 3.87273400  | 0.74689400  |
| H  | -5.14365700 | 4.06913500  | 1.37765700  |
| H  | -6.84259300 | 2.63694500  | 0.27515300  |
| C  | 0.15217300  | 0.43488500  | -0.76163800 |
| O  | 1.15707500  | 1.30093700  | -1.18255700 |
| H  | 1.17852700  | 1.99089100  | -0.49264100 |
| C  | -1.05437200 | 0.99585700  | -0.36199500 |
| H  | -1.79173200 | 0.34016000  | 0.08520500  |
| Cl | -0.44934700 | 2.06355400  | 1.56966400  |
| C  | -1.64579300 | 2.18472700  | -1.09815800 |
| H  | -1.07000900 | 3.09087700  | -0.90131800 |
| H  | -1.55743300 | 1.96820000  | -2.17082200 |

### 3

|   |             |             |             |
|---|-------------|-------------|-------------|
| C | 0.42058100  | -0.79935400 | -0.81767800 |
| C | 1.64051700  | -2.60610200 | -0.64347100 |
| C | 3.02303700  | -3.17898600 | -0.67253000 |
| C | 3.82180100  | -1.99478800 | -1.28268500 |
| C | 3.05855100  | -0.71830300 | -0.85965600 |
| H | 3.34802100  | -3.41619200 | 0.34488600  |
| H | 3.07993200  | -4.09065200 | -1.26776000 |
| H | 3.82299900  | -2.08275000 | -2.37236100 |
| H | 3.11589700  | 0.09454300  | -1.58272500 |
| N | 0.42168800  | -3.03224100 | -0.48095700 |
| N | -0.33052500 | -1.89147500 | -0.58200200 |
| N | 1.68065200  | -1.25687500 | -0.83941400 |
| H | 4.85726200  | -1.95882800 | -0.94143700 |
| C | -1.75042900 | -1.90588100 | -0.35799800 |
| C | -2.22639300 | -1.35443100 | 0.83419400  |
| C | -2.57754900 | -2.34771500 | -1.39356100 |
| C | -3.60904100 | -1.20943800 | 0.94843600  |
| C | -3.94955400 | -2.19193700 | -1.22114900 |
| C | -4.47778400 | -1.60486500 | -0.06725500 |



|   |             |             |             |
|---|-------------|-------------|-------------|
| H | -4.01142100 | -0.74338800 | 1.84390900  |
| H | -4.62034200 | -2.51296400 | -2.01454500 |
| C | 3.43800400  | -0.22188800 | 0.54520800  |
| H | 3.57667200  | -1.09010800 | 1.20271500  |
| H | 2.61601300  | 0.37560800  | 0.95517200  |
| C | 4.69099900  | 0.61448400  | 0.49461200  |
| C | 5.95853100  | 0.05751700  | 0.67245300  |
| C | 4.58008300  | 1.98288300  | 0.23123000  |
| C | 7.10094000  | 0.84831200  | 0.57510500  |
| H | 6.05170700  | -0.99985700 | 0.91235300  |
| C | 5.71996800  | 2.77374700  | 0.13567000  |
| H | 3.58989100  | 2.42142200  | 0.13110200  |
| C | 6.98260500  | 2.20768300  | 0.30210200  |
| H | 8.08062600  | 0.40438300  | 0.72185800  |
| H | 5.62178400  | 3.83712700  | -0.05769400 |
| H | 7.87105300  | 2.82729300  | 0.23305700  |
| C | -5.96436600 | -1.41738300 | 0.08309300  |
| H | -6.41353400 | -1.08251500 | -0.85588800 |
| H | -6.44900900 | -2.35740100 | 0.36645900  |
| H | -6.18360000 | -0.67297200 | 0.85140000  |
| C | -1.29487900 | -0.88710800 | 1.91730900  |
| H | -1.84583700 | -0.72825100 | 2.84583800  |
| H | -0.50759500 | -1.62395300 | 2.10570200  |
| H | -0.80445400 | 0.06247200  | 1.66437300  |
| C | -1.98881200 | -2.90998900 | -2.65992000 |
| H | -1.37462800 | -3.79034500 | -2.45142400 |
| H | -2.77766800 | -3.19241300 | -3.35876800 |
| H | -1.34623000 | -2.17137800 | -3.15288100 |
| C | -5.23908400 | 2.09041800  | 0.28247100  |
| C | -4.21085700 | 2.19404800  | -0.65201900 |
| C | -2.88785400 | 2.34937200  | -0.23643100 |
| C | -2.59916500 | 2.38515700  | 1.13129800  |
| C | -3.62737200 | 2.27922200  | 2.06400500  |
| C | -4.94880100 | 2.13089500  | 1.64431100  |
| H | -6.26620400 | 1.98191100  | -0.05398200 |
| H | -4.43841500 | 2.15704200  | -1.71501600 |
| H | -1.56481000 | 2.48578500  | 1.45986500  |
| H | -3.39169000 | 2.31508000  | 3.12344500  |
| H | -5.74930000 | 2.05437300  | 2.37441200  |
| C | 0.03560000  | 0.60450500  | -1.01995100 |
| O | 1.07022900  | 1.46206800  | -0.90433100 |
| H | 1.08799200  | 1.79325700  | 0.07749900  |
| C | -1.23360800 | 0.94905800  | -1.29141800 |
| H | -1.97977400 | 0.17784900  | -1.44597000 |

|    |             |            |             |
|----|-------------|------------|-------------|
| C1 | 0.96829600  | 2.07063800 | 1.86984900  |
| C  | -1.75041400 | 2.35416200 | -1.24291600 |
| H  | -0.94884800 | 3.03132800 | -0.93742300 |
| H  | -2.11976800 | 2.66809000 | -2.22601200 |

**TS4**

|   |             |             |             |
|---|-------------|-------------|-------------|
| C | 1.07576200  | -0.51201700 | -0.18120600 |
| C | 0.79684200  | -2.67357800 | -0.33992500 |
| C | -0.17867300 | -3.80655100 | -0.37988000 |
| C | -1.49785400 | -3.05507800 | -0.68626100 |
| C | -1.31997000 | -1.64138800 | -0.09527900 |
| H | 0.08194500  | -4.55851100 | -1.12526600 |
| H | -0.21118000 | -4.29173100 | 0.60077300  |
| H | -2.37624300 | -3.54631500 | -0.26757400 |
| H | -1.48043800 | -1.65486500 | 0.98784600  |
| N | 2.08828100  | -2.52260600 | -0.29968100 |
| N | 2.24053200  | -1.16612500 | -0.19652600 |
| N | 0.14458500  | -1.47303100 | -0.27311200 |
| H | -1.63673700 | -2.97149900 | -1.76999100 |
| C | 3.54735000  | -0.56707900 | -0.14722000 |
| C | 4.16931200  | -0.25148500 | -1.35508800 |
| C | 4.12200800  | -0.33644600 | 1.10284100  |
| C | 5.44005500  | 0.31241000  | -1.28872000 |
| C | 5.39503900  | 0.23022700  | 1.11424000  |
| C | 6.06395400  | 0.56009100  | -0.06460600 |
| H | 5.95275200  | 0.56786100  | -2.21267400 |
| H | 5.87296100  | 0.42160500  | 2.07167200  |
| C | -2.18171500 | -0.54425000 | -0.70596500 |
| H | -2.00781800 | -0.48670500 | -1.78692700 |
| H | -1.89821700 | 0.41897700  | -0.26932300 |
| C | -3.63480700 | -0.82459300 | -0.40364100 |
| C | -4.52149300 | -1.25089300 | -1.39132900 |
| C | -4.09926100 | -0.66997700 | 0.90665300  |
| C | -5.85519100 | -1.51211700 | -1.08090900 |
| H | -4.16849000 | -1.36609700 | -2.41336400 |
| C | -5.42770200 | -0.93537400 | 1.21896800  |
| H | -3.41139200 | -0.31732900 | 1.67344400  |
| C | -6.30975600 | -1.35619500 | 0.22442100  |
| H | -6.53768400 | -1.83578600 | -1.86057700 |
| H | -5.77864300 | -0.80657200 | 2.23802400  |
| H | -7.34816600 | -1.55876300 | 0.46672200  |
| C | 7.42434900  | 1.20563400  | -0.01694900 |
| H | 8.01429800  | 0.95306700  | -0.90101400 |
| H | 7.33000500  | 2.29578400  | 0.01947600  |

|    |             |             |             |
|----|-------------|-------------|-------------|
| H  | 7.98040100  | 0.89249000  | 0.86961200  |
| C  | 3.46894500  | -0.49508000 | -2.66443800 |
| H  | 3.15572100  | -1.53938100 | -2.75851100 |
| H  | 2.57419600  | 0.13384400  | -2.73341900 |
| H  | 4.12247300  | -0.25295500 | -3.50387000 |
| C  | 3.37593800  | -0.66006500 | 2.36670600  |
| H  | 2.51482700  | 0.01061300  | 2.45554100  |
| H  | 3.00681100  | -1.69014700 | 2.35830500  |
| H  | 4.01885000  | -0.53041300 | 3.23859900  |
| C  | -3.80321800 | 2.81846700  | -1.18838200 |
| C  | -2.48014300 | 3.01312200  | -1.58088800 |
| C  | -1.45408900 | 3.04833400  | -0.63584800 |
| C  | -1.77697900 | 2.89899200  | 0.71783600  |
| C  | -3.09762000 | 2.70473500  | 1.11102800  |
| C  | -4.11506400 | 2.65847900  | 0.15847500  |
| H  | -4.59001500 | 2.77996400  | -1.93592800 |
| H  | -2.23696200 | 3.12046300  | -2.63579400 |
| H  | -0.97380400 | 2.89062300  | 1.45057200  |
| H  | -3.32818200 | 2.57039900  | 2.16386100  |
| H  | -5.14190600 | 2.48168200  | 0.46306400  |
| C  | 0.89759500  | 0.97265800  | -0.04335800 |
| O  | 1.19133800  | 1.45875700  | 1.12666000  |
| H  | 0.26259900  | 0.75357300  | 2.10955800  |
| C  | 0.43684800  | 1.61273300  | -1.14015100 |
| H  | 0.21250200  | 1.04173800  | -2.03784500 |
| Cl | -0.60706200 | -0.03348700 | 2.87786600  |
| C  | 0.00082800  | 3.05248600  | -1.05975800 |
| H  | 0.61108200  | 3.56847300  | -0.31345900 |
| H  | 0.12225100  | 3.56027200  | -2.02149800 |

#### 4

|   |             |             |             |
|---|-------------|-------------|-------------|
| C | -0.37542300 | -0.81201400 | -0.05537300 |
| C | -0.38086100 | -2.83050200 | 0.81352000  |
| C | 0.44442400  | -4.03069200 | 1.15960900  |
| C | 1.72785300  | -3.76327600 | 0.32468600  |
| C | 1.82094400  | -2.22608800 | 0.16113200  |
| H | 0.64782300  | -4.04090700 | 2.23479200  |
| H | -0.05062300 | -4.96689000 | 0.90101400  |
| H | 1.62305700  | -4.23290500 | -0.65654200 |
| H | 2.20600000  | -1.90553700 | -0.80528700 |
| N | -1.61672900 | -2.44291600 | 0.92066800  |
| N | -1.59886700 | -1.17666800 | 0.37838000  |
| N | 0.39539200  | -1.87254200 | 0.23763900  |
| H | 2.62971500  | -4.15919400 | 0.79548200  |

|   |             |             |             |
|---|-------------|-------------|-------------|
| C | -2.80936900 | -0.40581700 | 0.37742900  |
| C | -2.92664000 | 0.66850100  | 1.26276900  |
| C | -3.82029500 | -0.77779000 | -0.51174400 |
| C | -4.12278300 | 1.38355600  | 1.23712400  |
| C | -4.99700400 | -0.03373600 | -0.49348400 |
| C | -5.16332000 | 1.04961600  | 0.37066900  |
| H | -4.23989500 | 2.22742100  | 1.91226800  |
| H | -5.79952400 | -0.30259500 | -1.17577500 |
| C | 2.60436700  | -1.52867100 | 1.28202500  |
| H | 2.37875200  | -2.00749000 | 2.24352200  |
| H | 2.26611200  | -0.49018000 | 1.30035100  |
| C | 4.08149400  | -1.57428300 | 0.98539700  |
| C | 4.94781800  | -2.44103200 | 1.65002700  |
| C | 4.58350800  | -0.73960100 | -0.02027200 |
| C | 6.30186100  | -2.47793000 | 1.32024400  |
| H | 4.56330200  | -3.08301500 | 2.43966900  |
| C | 5.93376500  | -0.77751700 | -0.34855700 |
| H | 3.89396400  | -0.06509800 | -0.52636800 |
| C | 6.79570300  | -1.64706100 | 0.32000400  |
| H | 6.96902100  | -3.15291700 | 1.84710300  |
| H | 6.31813600  | -0.12382900 | -1.12519200 |
| H | 7.84993500  | -1.67277300 | 0.06332200  |
| C | -6.42990800 | 1.86521700  | 0.34481300  |
| H | -6.65719100 | 2.27325400  | 1.33226300  |
| H | -6.32990300 | 2.70849500  | -0.34605600 |
| H | -7.28121500 | 1.26533500  | 0.01545000  |
| C | -1.79630600 | 1.07655500  | 2.16641200  |
| H | -1.29315000 | 0.20766700  | 2.60042400  |
| H | -1.05522800 | 1.65165600  | 1.59802300  |
| H | -2.16484900 | 1.70429500  | 2.97935500  |
| C | -3.62110900 | -1.92407800 | -1.46645900 |
| H | -2.71500700 | -1.77304400 | -2.06290600 |
| H | -3.50839000 | -2.86935400 | -0.92853400 |
| H | -4.46932200 | -2.00789900 | -2.14755900 |
| C | -0.99574500 | 5.82181700  | -0.12582300 |
| C | -0.98583300 | 4.80338900  | -1.07914400 |
| C | -0.17720300 | 3.68047500  | -0.91502900 |
| C | 0.62930000  | 3.59006100  | 0.22792500  |
| C | 0.62036300  | 4.60463000  | 1.17809600  |
| C | -0.19353100 | 5.72536700  | 1.00549600  |
| H | -1.63153500 | 6.69044400  | -0.26995200 |
| H | -1.61515500 | 4.88191800  | -1.96230900 |
| H | 1.25896700  | 2.70942800  | 0.34432100  |
| H | 1.25417400  | 4.52640800  | 2.05671600  |

|   |             |            |             |
|---|-------------|------------|-------------|
| H | -0.19763500 | 6.51764100 | 1.74765400  |
| C | 0.19698800  | 0.41602000 | -0.70091000 |
| O | 1.47053800  | 0.48016900 | -0.61360900 |
| C | -0.68445700 | 1.26953200 | -1.30032600 |
| H | -1.75153900 | 1.08540300 | -1.27869200 |
| C | -0.17037600 | 2.54023500 | -1.91601500 |
| H | 0.86041800  | 2.36242700 | -2.24285600 |
| H | -0.76268400 | 2.82123900 | -2.79334100 |

**TS5(RR)**

|   |             |             |             |
|---|-------------|-------------|-------------|
| C | 0.64331600  | -1.83835900 | 0.52868900  |
| C | 0.48825700  | -3.96659800 | 0.06323600  |
| C | -0.44771500 | -5.11744000 | -0.13525500 |
| C | -1.74007000 | -4.55997100 | 0.52720800  |
| C | -1.68299000 | -3.01999200 | 0.35741000  |
| H | -0.58358000 | -5.31016700 | -1.20390400 |
| H | -0.08464700 | -6.03233900 | 0.33238300  |
| H | -1.73423200 | -4.80986600 | 1.59077100  |
| H | -2.05738700 | -2.46700500 | 1.22093200  |
| N | 1.77075600  | -3.74847100 | 0.12853700  |
| N | 1.85054000  | -2.40673200 | 0.41831200  |
| N | -0.22286000 | -2.83002800 | 0.30917700  |
| H | -2.65196500 | -4.96725200 | 0.08809100  |
| C | 3.09607300  | -1.83274900 | 0.87181400  |
| C | 4.04457900  | -1.40744600 | -0.05515900 |
| C | 3.27981600  | -1.74232200 | 2.25845200  |
| C | 5.22587300  | -0.85964000 | 0.44984800  |
| C | 4.46978900  | -1.17875100 | 2.70686400  |
| C | 5.44988900  | -0.72678800 | 1.81753600  |
| H | 5.97807600  | -0.51084000 | -0.25311600 |
| H | 4.63811700  | -1.09119000 | 3.77724900  |
| C | -2.35542400 | -2.51482700 | -0.92564900 |
| H | -2.10434300 | -3.18348100 | -1.75940000 |
| H | -1.95372800 | -1.52502000 | -1.15952400 |
| C | -3.84741800 | -2.39859000 | -0.73777700 |
| C | -4.72513500 | -3.41297800 | -1.11936400 |
| C | -4.35086900 | -1.24501800 | -0.12898300 |
| C | -6.09283300 | -3.28221900 | -0.88640100 |
| H | -4.34210300 | -4.30090100 | -1.61813200 |
| C | -5.71581200 | -1.11387600 | 0.10228500  |
| H | -3.66272300 | -0.44397500 | 0.14085400  |
| C | -6.58801800 | -2.13485400 | -0.27335600 |
| H | -6.77080500 | -4.07294400 | -1.19148800 |
| H | -6.09076100 | -0.20661100 | 0.56680800  |

|   |             |             |             |
|---|-------------|-------------|-------------|
| H | -7.65394100 | -2.03160300 | -0.09765100 |
| C | 6.70164900  | -0.07065600 | 2.33802200  |
| H | 7.10569100  | -0.61257600 | 3.19682500  |
| H | 7.47364500  | -0.01989200 | 1.56750200  |
| H | 6.48506300  | 0.95158200  | 2.66588300  |
| C | 3.78781900  | -1.45933600 | -1.53305400 |
| H | 3.18040600  | -2.32125100 | -1.81530100 |
| H | 3.25523000  | -0.55621700 | -1.85337300 |
| H | 4.72910100  | -1.50077900 | -2.08466400 |
| C | 2.23324900  | -2.24210200 | 3.22131500  |
| H | 1.33242200  | -1.61905000 | 3.20400400  |
| H | 1.93597700  | -3.26689900 | 2.97427500  |
| H | 2.62509000  | -2.24038000 | 4.23935100  |
| C | 4.60062400  | 2.86042400  | 0.27114900  |
| C | 3.48855300  | 2.21175900  | 0.79536700  |
| C | 2.20054600  | 2.72224100  | 0.60208400  |
| C | 2.04882300  | 3.90410700  | -0.12308400 |
| C | 3.16309600  | 4.56161900  | -0.64398800 |
| C | 4.44022000  | 4.04180500  | -0.45199500 |
| H | 5.59237900  | 2.44246600  | 0.42495600  |
| H | 3.61011500  | 1.28603000  | 1.35598700  |
| H | 1.04764800  | 4.28648200  | -0.30252400 |
| H | 3.03034200  | 5.47950400  | -1.20854900 |
| H | 5.30510600  | 4.55256900  | -0.86364700 |
| C | 0.26325200  | -0.46126000 | 1.05503200  |
| O | -0.59656300 | -0.50777800 | 1.94010100  |
| C | 0.91369300  | 0.61725800  | 0.41836800  |
| H | 1.80843500  | 0.32394300  | -0.12453900 |
| C | 1.01010300  | 1.95107700  | 1.12027800  |
| H | 0.09553300  | 2.53313500  | 0.97954300  |
| H | 1.10751900  | 1.77886700  | 2.20028300  |
| C | -3.44312400 | 2.25624900  | 0.89685200  |
| C | -3.70325900 | 3.58562400  | 0.48963400  |
| C | -4.77794700 | 4.30554600  | 1.00163700  |
| C | -5.60211500 | 3.69357500  | 1.94065000  |
| C | -5.34593300 | 2.38510300  | 2.36740100  |
| C | -4.27280700 | 1.66543800  | 1.85853800  |
| H | -4.96825800 | 5.32325000  | 0.67676400  |
| H | -6.44511700 | 4.24032700  | 2.34993700  |
| H | -5.98938800 | 1.93015300  | 3.11416600  |
| H | -4.04848100 | 0.65937200  | 2.19990500  |
| N | -2.35766800 | 1.64490700  | 0.30781400  |
| S | -2.49740600 | 4.07094400  | -0.67627100 |
| C | -1.75886800 | 2.45160800  | -0.53266000 |

|   |             |             |             |
|---|-------------|-------------|-------------|
| N | -0.65347900 | 2.21924000  | -1.26726100 |
| C | -0.25635500 | 0.94185700  | -1.28176700 |
| H | -1.00629600 | 0.18314700  | -1.04250200 |
| C | 0.69570900  | 0.54325600  | -2.35538300 |
| C | 1.61997800  | 1.45868800  | -2.87179300 |
| C | 0.63909600  | -0.74384700 | -2.89435600 |
| C | 2.45902200  | 1.08793700  | -3.91609300 |
| H | 1.65255500  | 2.45750800  | -2.44738100 |
| C | 1.47008800  | -1.10987600 | -3.95184000 |
| H | -0.08387700 | -1.45663900 | -2.50122900 |
| C | 2.38317500  | -0.19401800 | -4.46507400 |
| H | 3.17206400  | 1.80467900  | -4.31136400 |
| H | 1.40170300  | -2.10732300 | -4.37552800 |
| H | 3.03181500  | -0.47404400 | -5.28899600 |

**TS5(RS)**

|   |             |             |             |
|---|-------------|-------------|-------------|
| C | -0.57928400 | -1.77947300 | -0.87481100 |
| C | -0.26193900 | -3.93593300 | -0.71613400 |
| C | 0.74012500  | -5.03978600 | -0.62540900 |
| C | 2.01476500  | -4.33511900 | -1.16155100 |
| C | 1.83326100  | -2.81406700 | -0.90709000 |
| H | 0.84903700  | -5.34879900 | 0.41885500  |
| H | 0.45146900  | -5.91389200 | -1.20922500 |
| H | 2.10117200  | -4.51547200 | -2.23562900 |
| H | 2.15601300  | -2.20133900 | -1.74847500 |
| N | -1.55768700 | -3.80601500 | -0.71064100 |
| N | -1.74070100 | -2.45339300 | -0.81911400 |
| N | 0.36113200  | -2.73152100 | -0.83659700 |
| H | 2.92702800  | -4.69833800 | -0.68569000 |
| C | -3.06782100 | -1.91662500 | -0.95486600 |
| C | -3.90570300 | -1.95682200 | 0.15914600  |
| C | -3.44273000 | -1.35914700 | -2.18218900 |
| C | -5.15867300 | -1.35592100 | 0.03466500  |
| C | -4.70689900 | -0.78176000 | -2.25399600 |
| C | -5.56888200 | -0.75554800 | -1.15381700 |
| H | -5.82349700 | -1.35382800 | 0.89430700  |
| H | -5.02533500 | -0.33230300 | -3.19189800 |
| C | 2.47383900  | -2.29331900 | 0.38168400  |
| H | 2.10263300  | -2.88283900 | 1.23059300  |
| H | 2.15471700  | -1.25021200 | 0.52443000  |
| C | 3.97592000  | -2.39874400 | 0.28784100  |
| C | 4.69010800  | -3.31429600 | 1.06180200  |
| C | 4.67066600  | -1.59617100 | -0.62236600 |
| C | 6.07310200  | -3.42567700 | 0.93692400  |

|   |              |              |              |
|---|--------------|--------------|--------------|
| H | 4. 15843500  | -3. 93754700 | 1. 77741600  |
| C | 6. 05095700  | -1. 70678500 | -0. 74998700 |
| H | 4. 12244000  | -0. 86400700 | -1. 21085500 |
| C | 6. 75562900  | -2. 62300600 | 0. 02857700  |
| H | 6. 61606800  | -4. 13709800 | 1. 55117000  |
| H | 6. 57887600  | -1. 07064300 | -1. 45333800 |
| H | 7. 83330700  | -2. 70623300 | -0. 06941100 |
| C | -6. 90993000 | -0. 07822200 | -1. 26382700 |
| H | -7. 47884400 | -0. 16986600 | -0. 33676700 |
| H | -6. 78644800 | 0. 98702800  | -1. 48373900 |
| H | -7. 50317300 | -0. 51228100 | -2. 07384700 |
| C | -3. 46104600 | -2. 61510000 | 1. 43355400  |
| H | -3. 40320800 | -3. 69993000 | 1. 30355600  |
| H | -2. 47015600 | -2. 26016800 | 1. 73465200  |
| H | -4. 15577600 | -2. 39301300 | 2. 24412100  |
| C | -2. 51715100 | -1. 35361400 | -3. 36997800 |
| H | -1. 75811500 | -0. 56875500 | -3. 27743800 |
| H | -1. 99635100 | -2. 31005300 | -3. 47503200 |
| H | -3. 07985500 | -1. 17003600 | -4. 28671300 |
| C | -4. 53586500 | 3. 33951000  | 0. 18409600  |
| C | -3. 63158100 | 2. 56040700  | -0. 53037200 |
| C | -2. 26983200 | 2. 88248300  | -0. 55503900 |
| C | -1. 83303200 | 4. 00765700  | 0. 14760400  |
| C | -2. 73829000 | 4. 79035100  | 0. 86272900  |
| C | -4. 08980100 | 4. 45940300  | 0. 88453600  |
| H | -5. 58942700 | 3. 07450000  | 0. 19623000  |
| H | -3. 97746600 | 1. 68081700  | -1. 07252700 |
| H | -0. 77067800 | 4. 24110100  | 0. 14825100  |
| H | -2. 38381800 | 5. 65875900  | 1. 40958400  |
| H | -4. 79240900 | 5. 06849700  | 1. 44459900  |
| C | -0. 27204800 | -0. 31833900 | -1. 10767400 |
| O | 0. 85004100  | -0. 11587500 | -1. 59232000 |
| C | -1. 19364100 | 0. 62584100  | -0. 61767200 |
| H | -2. 13436500 | 0. 23122000  | -0. 24393400 |
| C | -1. 29661800 | 1. 98582600  | -1. 28581000 |
| H | -0. 30924200 | 2. 44737400  | -1. 34400200 |
| H | -1. 65881500 | 1. 84037300  | -2. 31533800 |
| C | 2. 60831100  | 3. 74633500  | -0. 30936300 |
| C | 3. 88060500  | 3. 16171100  | -0. 11617200 |
| C | 5. 05026900  | 3. 83594700  | -0. 45090700 |
| C | 4. 94924700  | 5. 11422600  | -0. 99001300 |
| C | 3. 69580200  | 5. 70417900  | -1. 19050300 |
| C | 2. 52867000  | 5. 03194500  | -0. 85619300 |
| H | 6. 02032600  | 3. 37552200  | -0. 29310100 |



|   |              |              |              |
|---|--------------|--------------|--------------|
| H | 5. 85050600  | 5. 65667000  | -1. 25607800 |
| H | 3. 63538400  | 6. 70207900  | -1. 61341800 |
| H | 1. 55227300  | 5. 48071300  | -1. 00897000 |
| N | 1. 52722800  | 2. 97685600  | 0. 06534200  |
| S | 3. 67475400  | 1. 57259700  | 0. 57524200  |
| C | 1. 90526600  | 1. 81817100  | 0. 53534100  |
| N | 1. 16169300  | 0. 80800800  | 1. 03800600  |
| C | -0. 15000900 | 1. 03108100  | 1. 15705700  |
| H | -0. 51099200 | 2. 06025900  | 1. 08735900  |
| C | -0. 89574800 | 0. 20955600  | 2. 15588600  |
| C | -0. 27691000 | -0. 85092900 | 2. 82395200  |
| C | -2. 19461000 | 0. 58172500  | 2. 52554100  |
| C | -0. 93920600 | -1. 51610300 | 3. 85419800  |
| H | 0. 74730200  | -1. 09598400 | 2. 56097900  |
| C | -2. 84803000 | -0. 07486600 | 3. 56285200  |
| H | -2. 67644000 | 1. 41113600  | 2. 00913500  |
| C | -2. 22052000 | -1. 12392300 | 4. 23454300  |
| H | -0. 44235000 | -2. 32641500 | 4. 37959400  |
| H | -3. 84585300 | 0. 23874700  | 3. 85497700  |
| H | -2. 72688100 | -1. 63017900 | 5. 05061800  |

**TS5(SR)**

|   |              |              |              |
|---|--------------|--------------|--------------|
| C | 0. 25081800  | 0. 08017700  | 0. 74504200  |
| C | 1. 58751100  | -0. 69626000 | 2. 29351900  |
| C | 3. 00194700  | -0. 87903600 | 2. 74114800  |
| C | 3. 80050300  | -0. 43021800 | 1. 48314200  |
| C | 2. 84229100  | 0. 42970500  | 0. 62173600  |
| H | 3. 20065700  | -0. 25543900 | 3. 61753900  |
| H | 3. 20558600  | -1. 91756400 | 3. 00917300  |
| H | 4. 11991300  | -1. 30843900 | 0. 92290000  |
| H | 2. 91884500  | 0. 22947100  | -0. 44733300 |
| N | 0. 39375600  | -0. 94713700 | 2. 75108500  |
| N | -0. 43316100 | -0. 45874500 | 1. 77274600  |
| N | 1. 53677900  | -0. 05729400 | 1. 09595800  |
| H | 4. 69148300  | 0. 14490800  | 1. 74352800  |
| C | -1. 84444800 | -0. 34292600 | 2. 03927700  |
| C | -2. 36644200 | 0. 94762800  | 2. 20302500  |
| C | -2. 62049100 | -1. 49956900 | 2. 15589700  |
| C | -3. 74134300 | 1. 06006000  | 2. 39411300  |
| C | -3. 98954500 | -1. 32449800 | 2. 36104000  |
| C | -4. 56966400 | -0. 06043700 | 2. 45401900  |
| H | -4. 17024300 | 2. 05397400  | 2. 49687700  |
| H | -4. 61759000 | -2. 20845000 | 2. 44479900  |
| C | 2. 96833900  | 1. 93646700  | 0. 89731200  |

|   |             |             |             |
|---|-------------|-------------|-------------|
| H | 3.09163200  | 2.09713300  | 1.97618800  |
| H | 2.04285300  | 2.41418800  | 0.56733000  |
| C | 4.13586400  | 2.50557200  | 0.13206700  |
| C | 5.33754700  | 2.84121400  | 0.75397900  |
| C | 4.01664100  | 2.66562200  | -1.25308800 |
| C | 6.40828200  | 3.33135400  | 0.00846600  |
| H | 5.43311000  | 2.72809400  | 1.83170200  |
| C | 5.08426400  | 3.15391400  | -1.99706200 |
| H | 3.07186800  | 2.40715100  | -1.72832800 |
| C | 6.28354500  | 3.48707500  | -1.36796200 |
| H | 7.33754700  | 3.59275600  | 0.50494600  |
| H | 4.98097700  | 3.28012800  | -3.07036100 |
| H | 7.11599100  | 3.86970600  | -1.94994200 |
| C | -6.06010100 | 0.09508000  | 2.60617300  |
| H | -6.30808700 | 0.97476100  | 3.20479600  |
| H | -6.53333300 | 0.21846900  | 1.62621300  |
| H | -6.50518800 | -0.78213500 | 3.08115000  |
| C | -1.50106600 | 2.17976700  | 2.16888400  |
| H | -0.55231600 | 2.01574400  | 2.69085600  |
| H | -1.27929800 | 2.48566200  | 1.14026600  |
| H | -2.01855700 | 3.01251800  | 2.64853800  |
| C | -2.03127600 | -2.87908600 | 2.04717100  |
| H | -2.76367400 | -3.62471100 | 2.36348400  |
| H | -1.74562500 | -3.08226200 | 1.00866100  |
| H | -1.13809800 | -2.97917400 | 2.66830900  |
| C | -3.88422800 | 4.03439000  | 0.13110700  |
| C | -3.58259700 | 2.90837400  | -0.62914900 |
| C | -2.36324800 | 2.80730700  | -1.30641900 |
| C | -1.44874400 | 3.86051200  | -1.20624200 |
| C | -1.74987700 | 4.98805300  | -0.44445000 |
| C | -2.96624300 | 5.07886800  | 0.22784600  |
| H | -4.83963300 | 4.10049100  | 0.64464400  |
| H | -4.29270500 | 2.08601000  | -0.69326900 |
| H | -0.48894300 | 3.76939800  | -1.70585300 |
| H | -1.02981000 | 5.79784100  | -0.37416200 |
| H | -3.20097300 | 5.95906700  | 0.81823000  |
| C | -0.17236300 | 0.77968400  | -0.52670400 |
| O | 0.71582800  | 1.50293100  | -1.03607900 |
| C | -1.46857800 | 0.55508300  | -0.99060800 |
| H | -2.19108900 | 0.09579400  | -0.32817200 |
| C | -1.99888700 | 1.52252700  | -2.01907600 |
| H | -1.22882700 | 1.71479800  | -2.77314500 |
| H | -2.88075600 | 1.10783800  | -2.51652200 |
| C | 2.67198200  | -2.43915600 | -1.12396600 |

|   |             |             |             |
|---|-------------|-------------|-------------|
| C | 2.66038400  | -3.38069000 | -0.06819600 |
| C | 3.84083200  | -3.93354600 | 0.42798900  |
| C | 5.04641800  | -3.53752400 | -0.13931700 |
| C | 5.07238300  | -2.60391800 | -1.18659700 |
| C | 3.89951100  | -2.05355100 | -1.68125400 |
| H | 3.81707800  | -4.66381300 | 1.23070100  |
| H | 5.97560700  | -3.95849400 | 0.23010600  |
| H | 6.02436600  | -2.30916200 | -1.61587000 |
| H | 3.90431600  | -1.33348300 | -2.49320700 |
| N | 1.44126500  | -1.97424700 | -1.53224500 |
| S | 1.01231900  | -3.68794200 | 0.40336500  |
| C | 0.47738200  | -2.54700600 | -0.86503800 |
| N | -0.86287500 | -2.40295100 | -1.01034200 |
| C | -1.26415000 | -1.56795900 | -1.94776900 |
| H | -0.55245700 | -1.15524100 | -2.66789500 |
| C | -2.68564200 | -1.58243900 | -2.34298000 |
| C | -3.67988700 | -1.97548900 | -1.43933400 |
| C | -3.04901000 | -1.20197000 | -3.63700200 |
| C | -5.01336300 | -1.97028900 | -1.82267200 |
| H | -3.38774400 | -2.26711100 | -0.43500700 |
| C | -4.38637800 | -1.21313300 | -4.02581000 |
| H | -2.27715300 | -0.89374000 | -4.33773300 |
| C | -5.37073500 | -1.59182800 | -3.11826100 |
| H | -5.77994700 | -2.26393800 | -1.11176600 |
| H | -4.65845100 | -0.92128900 | -5.03500800 |
| H | -6.41425800 | -1.59263300 | -3.41696000 |

**TS5(SS)**

|   |             |             |             |
|---|-------------|-------------|-------------|
| C | 0.15343600  | -0.04572500 | 1.06481300  |
| C | 1.55895200  | -0.58648600 | 2.65212100  |
| C | 2.98790900  | -0.61687200 | 3.09136600  |
| C | 3.73611400  | -0.25167700 | 1.77782000  |
| C | 2.71449500  | 0.45723600  | 0.85261000  |
| H | 3.14912900  | 0.11494700  | 3.88840100  |
| H | 3.27099100  | -1.60218900 | 3.46561800  |
| H | 4.09444900  | -1.16365900 | 1.29804700  |
| H | 2.77232700  | 0.12256300  | -0.18416600 |
| N | 0.39940200  | -0.94797000 | 3.12346900  |
| N | -0.47050400 | -0.58789100 | 2.12233400  |
| N | 1.44525300  | -0.02024300 | 1.42183800  |
| H | 4.59599000  | 0.39676900  | 1.95968600  |
| C | -1.88592300 | -0.73645200 | 2.29676100  |
| C | -2.62935000 | 0.40831100  | 2.60027300  |
| C | -2.45463800 | -1.99539500 | 2.09798800  |

|   |             |             |             |
|---|-------------|-------------|-------------|
| C | -4.01351400 | 0.26703300  | 2.66387400  |
| C | -3.84433000 | -2.08273900 | 2.17881500  |
| C | -4.63570300 | -0.96357000 | 2.44384900  |
| H | -4.61866300 | 1.14359500  | 2.88296100  |
| H | -4.31839800 | -3.04935900 | 2.02630900  |
| C | 2.78712300  | 1.98896900  | 0.91166500  |
| H | 2.92057200  | 2.30691600  | 1.95356700  |
| H | 1.83849000  | 2.38403000  | 0.54028200  |
| C | 3.91995400  | 2.48269200  | 0.04756100  |
| C | 5.09735000  | 2.99351800  | 0.59185500  |
| C | 3.79560500  | 2.38574500  | -1.34312100 |
| C | 6.13978600  | 3.40546800  | -0.23666800 |
| H | 5.19622100  | 3.07758000  | 1.67192900  |
| C | 4.83575900  | 2.79485500  | -2.16936200 |
| H | 2.87162000  | 1.98841900  | -1.76006200 |
| C | 6.01065100  | 3.30533100  | -1.61783900 |
| H | 7.05074000  | 3.80519700  | 0.19778900  |
| H | 4.72973400  | 2.71781200  | -3.24692500 |
| H | 6.82147200  | 3.62555000  | -2.26439800 |
| C | -6.13811100 | -1.07515500 | 2.46929500  |
| H | -6.55560600 | -0.86191600 | 1.47961700  |
| H | -6.45700500 | -2.08039500 | 2.75364800  |
| H | -6.57532400 | -0.36263500 | 3.17246700  |
| C | -1.96524200 | 1.74553600  | 2.78648700  |
| H | -1.07984100 | 1.66196800  | 3.42400200  |
| H | -1.65661600 | 2.16356200  | 1.81940700  |
| H | -2.65736000 | 2.45712300  | 3.23946200  |
| C | -1.59353700 | -3.19669600 | 1.81487600  |
| H | -2.20949200 | -4.05381400 | 1.53664200  |
| H | -0.87800800 | -2.99765900 | 1.00819500  |
| H | -1.01536800 | -3.46386900 | 2.70604200  |
| C | -3.94996200 | 3.95025600  | 0.71639800  |
| C | -3.71302600 | 2.86906800  | -0.12776400 |
| C | -2.48211500 | 2.72004200  | -0.77353100 |
| C | -1.48921600 | 3.68205000  | -0.55830100 |
| C | -1.72469200 | 4.76412400  | 0.28638500  |
| C | -2.95385400 | 4.90108000  | 0.92892000  |
| H | -4.91394400 | 4.05364800  | 1.20670600  |
| H | -4.48556600 | 2.11914400  | -0.28524600 |
| H | -0.52557600 | 3.55585800  | -1.04467100 |
| H | -0.94636200 | 5.50518800  | 0.44238200  |
| H | -3.13652900 | 5.74609600  | 1.58536300  |
| C | -0.33088200 | 0.53965900  | -0.23485400 |
| O | 0.58262600  | 1.05421500  | -0.92361700 |

|   |             |             |             |
|---|-------------|-------------|-------------|
| C | -1.67149400 | 0.43427500  | -0.60444200 |
| H | -2.39348200 | 0.00505600  | 0.07963300  |
| C | -2.19068200 | 1.46855100  | -1.57328000 |
| H | -1.43232300 | 1.65502400  | -2.33961000 |
| H | -3.10392500 | 1.12084400  | -2.06510000 |
| C | 2.12870500  | -2.73341300 | -0.13453000 |
| C | 3.18311200  | -2.52121100 | -1.05373200 |
| C | 4.48238200  | -2.93625700 | -0.77103000 |
| C | 4.72892900  | -3.57799400 | 0.43928200  |
| C | 3.69245300  | -3.79503300 | 1.35750800  |
| C | 2.39821600  | -3.37211300 | 1.08320500  |
| H | 5.28353900  | -2.77132300 | -1.48386700 |
| H | 5.73382700  | -3.91544800 | 0.67009400  |
| H | 3.90319100  | -4.30505000 | 2.29249200  |
| H | 1.58523300  | -3.53444500 | 1.78549000  |
| N | 0.88532200  | -2.29778100 | -0.53949900 |
| S | 2.55280700  | -1.73509400 | -2.47708400 |
| C | 0.93150300  | -1.77721500 | -1.74164700 |
| N | -0.09741200 | -1.32128600 | -2.49287100 |
| C | -1.28733400 | -1.45406400 | -1.94722300 |
| H | -1.42115200 | -2.05025400 | -1.04088400 |
| C | -2.49648900 | -1.25568900 | -2.76375600 |
| C | -2.41339600 | -0.75595000 | -4.06626400 |
| C | -3.74845000 | -1.56096700 | -2.22042100 |
| C | -3.57150200 | -0.55864200 | -4.80980900 |
| H | -1.43147300 | -0.53160700 | -4.46994900 |
| C | -4.90468900 | -1.36158100 | -2.96480800 |
| H | -3.80689000 | -1.93686300 | -1.20027900 |
| C | -4.81780200 | -0.85754900 | -4.26210100 |
| H | -3.50363300 | -0.16837800 | -5.82039900 |
| H | -5.87406300 | -1.59735400 | -2.53669500 |
| H | -5.72024800 | -0.69882100 | -4.84406600 |

**5(RR)**

|   |             |             |            |
|---|-------------|-------------|------------|
| C | 0.07524600  | -1.08930200 | 0.69633300 |
| C | 0.92964700  | -1.98229900 | 2.50850500 |
| C | 2.16137100  | -2.26738300 | 3.30120700 |
| C | 3.25026000  | -2.07793200 | 2.21871000 |
| C | 2.68273900  | -1.05581400 | 1.20047000 |
| H | 2.25903700  | -1.54118600 | 4.11449400 |
| H | 2.15206700  | -3.26657500 | 3.73680800 |
| H | 3.42128500  | -3.02961800 | 1.70938300 |
| H | 2.97484100  | -1.31009700 | 0.18136500 |
| N | -0.34129500 | -2.21836500 | 2.60960200 |

|   |             |             |             |
|---|-------------|-------------|-------------|
| N | -0.86152100 | -1.66000500 | 1.46951800  |
| N | 1.22824200  | -1.30165100 | 1.35644800  |
| H | 4.20168200  | -1.73278700 | 2.62552100  |
| C | -2.26540600 | -1.86722700 | 1.19231400  |
| C | -3.20917700 | -0.99326000 | 1.73092300  |
| C | -2.61617900 | -3.01393100 | 0.47001400  |
| C | -4.55406900 | -1.26672500 | 1.48345600  |
| C | -3.97155600 | -3.24942100 | 0.26741000  |
| C | -4.95173100 | -2.38749100 | 0.76199600  |
| H | -5.30432100 | -0.57504500 | 1.85974300  |
| H | -4.26934800 | -4.12981700 | -0.29676100 |
| C | 3.05207500  | 0.39801800  | 1.51748700  |
| H | 2.70276700  | 0.64801200  | 2.52729300  |
| H | 2.53920300  | 1.06376600  | 0.81524900  |
| C | 4.54532800  | 0.60054400  | 1.41548000  |
| C | 5.31237700  | 0.90026700  | 2.54188900  |
| C | 5.18441100  | 0.45921100  | 0.18005000  |
| C | 6.69168300  | 1.06503800  | 2.43899600  |
| H | 4.82351700  | 1.01624300  | 3.50632800  |
| C | 6.56163700  | 0.62035200  | 0.07586700  |
| H | 4.59830800  | 0.23143400  | -0.70811700 |
| C | 7.31913100  | 0.92446300  | 1.20516100  |
| H | 7.27373300  | 1.30634400  | 3.32267000  |
| H | 7.04298300  | 0.51283600  | -0.89083700 |
| H | 8.39331000  | 1.05423800  | 1.12199500  |
| C | -6.41350000 | -2.66951100 | 0.53668400  |
| H | -6.96484400 | -1.73993700 | 0.37415800  |
| H | -6.56327700 | -3.31582600 | -0.33161800 |
| H | -6.85219200 | -3.17098300 | 1.40568000  |
| C | -2.84472900 | 0.20421100  | 2.56656500  |
| H | -1.76644500 | 0.29152400  | 2.71997700  |
| H | -3.20163300 | 1.11964500  | 2.08281100  |
| H | -3.31777800 | 0.13586100  | 3.55023100  |
| C | -1.57180200 | -3.94110800 | -0.08290100 |
| H | -1.10254800 | -3.44851400 | -0.94023000 |
| H | -0.80015200 | -4.16060500 | 0.66299800  |
| H | -2.02139300 | -4.88496600 | -0.39645200 |
| C | -5.17822700 | -0.39120800 | -1.79258400 |
| C | -3.81446100 | -0.17084000 | -1.96664500 |
| C | -3.23372700 | 1.02583200  | -1.54199400 |
| C | -4.03062100 | 1.97446200  | -0.89174700 |
| C | -5.39071900 | 1.74399900  | -0.69946000 |
| C | -5.97180600 | 0.56551200  | -1.16370800 |
| H | -5.62158800 | -1.32108900 | -2.13994900 |

|   |             |             |             |
|---|-------------|-------------|-------------|
| H | -3.17386000 | -0.92519600 | -2.41442900 |
| H | -3.57971800 | 2.90476500  | -0.54616300 |
| H | -6.00059500 | 2.49417000  | -0.20432400 |
| H | -7.03773700 | 0.39641100  | -1.03761000 |
| C | -0.23863300 | -0.46351400 | -0.71125600 |
| O | -0.83908300 | -1.32559100 | -1.44390100 |
| C | -0.96608900 | 0.89974500  | -0.46525500 |
| H | -1.68388500 | 0.71770100  | 0.34008100  |
| C | -1.75723300 | 1.27865800  | -1.73165900 |
| H | -1.59625900 | 2.33424300  | -1.96754300 |
| H | -1.38876400 | 0.68169100  | -2.56962100 |
| C | 1.90852100  | -0.98936700 | -2.04120500 |
| C | 2.87734200  | -0.38612600 | -2.85970600 |
| C | 3.74469400  | -1.14745900 | -3.63136300 |
| C | 3.63575500  | -2.53617600 | -3.58979400 |
| C | 2.67288300  | -3.13963800 | -2.78297600 |
| C | 1.80432600  | -2.38061000 | -2.00131900 |
| H | 4.48852100  | -0.66601100 | -4.25785700 |
| H | 4.30117900  | -3.14534200 | -4.19181000 |
| H | 2.58866700  | -4.22134200 | -2.76439600 |
| H | 1.03157500  | -2.84146900 | -1.39876400 |
| N | 1.18707600  | -0.07895800 | -1.26910000 |
| S | 2.81803000  | 1.36806500  | -2.72705000 |
| C | 1.51634700  | 1.24323000  | -1.51114700 |
| N | 1.03481000  | 2.28282700  | -0.95639600 |
| C | -0.00223800 | 2.00234600  | 0.02293000  |
| H | 0.47019700  | 1.62598100  | 0.95208100  |
| C | -0.75807100 | 3.26487400  | 0.38432200  |
| C | -0.84790400 | 4.33381400  | -0.50811600 |
| C | -1.44360700 | 3.34319900  | 1.59752100  |
| C | -1.64418200 | 5.43714700  | -0.20930700 |
| H | -0.27854200 | 4.28855600  | -1.43087300 |
| C | -2.23996800 | 4.44343500  | 1.89966400  |
| H | -1.34883100 | 2.53314200  | 2.31579600  |
| C | -2.35093300 | 5.49188900  | 0.98912200  |
| H | -1.71117000 | 6.25816100  | -0.91643600 |
| H | -2.76794300 | 4.48556300  | 2.84751100  |
| H | -2.97227700 | 6.35143200  | 1.21954400  |

**5(RS)**

|   |             |             |             |
|---|-------------|-------------|-------------|
| C | -0.41324900 | -1.66140200 | -0.67166000 |
| C | 0.27706600  | -3.74532200 | -0.67604700 |
| C | 1.46455200  | -4.65216900 | -0.74820800 |
| C | 2.55461600  | -3.65654300 | -1.22802300 |

|   |             |             |             |
|---|-------------|-------------|-------------|
| C | 2.14082200  | -2.27988100 | -0.65553500 |
| H | 1.68769300  | -5.06597300 | 0.24029200  |
| H | 1.30668800  | -5.48233100 | -1.43682300 |
| H | 2.54030900  | -3.60833500 | -2.31976000 |
| H | 2.40839200  | -1.44678500 | -1.30864500 |
| N | -1.01778500 | -3.84823600 | -0.67396700 |
| N | -1.42905600 | -2.53524600 | -0.66890000 |
| N | 0.67809900  | -2.44093300 | -0.65945400 |
| H | 3.56015300  | -3.93474100 | -0.91160100 |
| C | -2.82485500 | -2.20756200 | -0.62019100 |
| C | -3.44040000 | -2.20418700 | 0.63437400  |
| C | -3.45936700 | -1.81978100 | -1.79942500 |
| C | -4.75062600 | -1.73822300 | 0.69452800  |
| C | -4.77509300 | -1.36765400 | -1.68406000 |
| C | -5.42299800 | -1.30103500 | -0.45005500 |
| H | -5.25107200 | -1.69783100 | 1.65932500  |
| H | -5.29868700 | -1.04354400 | -2.58031300 |
| C | 2.63409200  | -2.03625200 | 0.78152100  |
| H | 2.42210900  | -2.92977200 | 1.38344700  |
| H | 2.04407500  | -1.21209000 | 1.19390900  |
| C | 4.10321000  | -1.69351500 | 0.82374100  |
| C | 5.09162200  | -2.67610700 | 0.91673100  |
| C | 4.49270000  | -0.35575100 | 0.73664300  |
| C | 6.44003600  | -2.32768200 | 0.89216400  |
| H | 4.80670300  | -3.72039000 | 1.02844000  |
| C | 5.83715400  | -0.00203200 | 0.70322200  |
| H | 3.73196400  | 0.41716600  | 0.72003400  |
| C | 6.81505100  | -0.99158400 | 0.77480100  |
| H | 7.19801800  | -3.10074000 | 0.97121300  |
| H | 6.10787300  | 1.04758800  | 0.62519100  |
| H | 7.86650200  | -0.72325600 | 0.75268200  |
| C | -6.81444300 | -0.73407300 | -0.33757900 |
| H | -7.45789400 | -1.37923400 | 0.26643800  |
| H | -6.78466000 | 0.24699000  | 0.14935000  |
| H | -7.27546300 | -0.60897300 | -1.31937400 |
| C | -2.69211700 | -2.65439600 | 1.85956800  |
| H | -2.36720700 | -3.69363000 | 1.75192900  |
| H | -1.80206200 | -2.03613800 | 2.02759300  |
| H | -3.32153300 | -2.57025000 | 2.74660300  |
| C | -2.73513500 | -1.85708800 | -3.11841900 |
| H | -1.85849400 | -1.19564800 | -3.11346700 |
| H | -2.37925000 | -2.87115300 | -3.32813600 |
| H | -3.40272600 | -1.55432900 | -3.92712200 |
| C | -5.23679200 | 3.20249100  | -0.12968600 |



|   |             |             |             |
|---|-------------|-------------|-------------|
| C | -4.33470100 | 2.34410300  | -0.74954700 |
| C | -3.00186600 | 2.72423300  | -0.94616200 |
| C | -2.59893700 | 3.98643400  | -0.50585500 |
| C | -3.49891400 | 4.84790100  | 0.11843500  |
| C | -4.82035100 | 4.45864200  | 0.30905500  |
| H | -6.27072800 | 2.89737100  | 0.00445200  |
| H | -4.65959400 | 1.36263100  | -1.09091700 |
| H | -1.56862000 | 4.29778400  | -0.66026800 |
| H | -3.16516200 | 5.82492400  | 0.45352900  |
| H | -5.52393300 | 5.12970200  | 0.79127100  |
| C | -0.39152800 | -0.14546500 | -1.08143500 |
| O | -0.00961800 | -0.12155800 | -2.30691000 |
| C | -1.61798100 | 0.68930400  | -0.54813600 |
| H | -2.50171500 | 0.13852100  | -0.22080300 |
| C | -2.01666200 | 1.76054600  | -1.55828000 |
| H | -1.11854600 | 2.28188000  | -1.90759200 |
| H | -2.44725600 | 1.26340300  | -2.43525200 |
| C | 3.17864400  | 2.78009600  | 0.05997600  |
| C | 3.58912300  | 2.33170700  | -1.21054100 |
| C | 4.76360700  | 2.79487400  | -1.79856700 |
| C | 5.53343300  | 3.71847800  | -1.09992900 |
| C | 5.13372500  | 4.17101200  | 0.16462900  |
| C | 3.96403600  | 3.70831300  | 0.75055100  |
| H | 5.07271800  | 2.44138300  | -2.77690500 |
| H | 6.45246300  | 4.09147300  | -1.53995800 |
| H | 5.74862200  | 4.89210200  | 0.69367900  |
| H | 3.64371600  | 4.04398200  | 1.73090900  |
| N | 2.02626300  | 2.19438000  | 0.55814800  |
| S | 2.42075700  | 1.18899200  | -1.84075700 |
| C | 1.54577400  | 1.33448400  | -0.29259600 |
| N | 0.45741100  | 0.56858200  | -0.01226000 |
| C | -0.73203700 | 1.19819500  | 0.60729600  |
| H | -0.62382400 | 2.28982100  | 0.64274000  |
| C | -1.08332500 | 0.67883600  | 1.97819900  |
| C | -0.10165900 | 0.16911000  | 2.82760700  |
| C | -2.40911800 | 0.73585200  | 2.41940700  |
| C | -0.44433000 | -0.30961800 | 4.09069200  |
| H | 0.93257000  | 0.17919200  | 2.49471600  |
| C | -2.74857200 | 0.26655200  | 3.68453400  |
| H | -3.17430300 | 1.14919900  | 1.76426500  |
| C | -1.76866900 | -0.26812100 | 4.51923300  |
| H | 0.32575200  | -0.70710200 | 4.74463800  |
| H | -3.78119900 | 0.31319800  | 4.01794000  |
| H | -2.03530600 | -0.64164500 | 5.50295800  |

**5(SR)**

|   |             |             |             |
|---|-------------|-------------|-------------|
| C | -0.33232900 | 1.06766100  | 0.76027900  |
| C | 0.87066800  | 1.52461600  | 2.51526000  |
| C | 2.23680500  | 1.77478900  | 3.06100000  |
| C | 3.01608200  | 2.16776500  | 1.78342400  |
| C | 2.26357500  | 1.53577800  | 0.58967000  |
| H | 2.24550400  | 2.54594300  | 3.83187000  |
| H | 2.61248300  | 0.84113700  | 3.48889400  |
| H | 4.05223500  | 1.82985000  | 1.80075600  |
| H | 2.59266800  | 0.50449400  | 0.43707200  |
| N | -0.30893200 | 1.27682000  | 2.99816000  |
| N | -1.06215400 | 1.01706200  | 1.87989100  |
| N | 0.88971300  | 1.46616800  | 1.14752500  |
| H | 3.01487600  | 3.25660900  | 1.66368700  |
| C | -2.44677900 | 0.65316300  | 1.99498200  |
| C | -3.42276600 | 1.53520700  | 1.52955400  |
| C | -2.74609300 | -0.59628100 | 2.56296800  |
| C | -4.75494700 | 1.12648100  | 1.63534300  |
| C | -4.08883700 | -0.95301800 | 2.63020800  |
| C | -5.10465000 | -0.10746400 | 2.17223200  |
| H | -5.53054100 | 1.79668300  | 1.27464000  |
| H | -4.34965800 | -1.92020100 | 3.05313000  |
| C | 2.40597100  | 2.30136200  | -0.72260500 |
| H | 2.01740200  | 3.31863100  | -0.60749100 |
| H | 1.81637000  | 1.80616500  | -1.49756200 |
| C | 3.86680200  | 2.30378100  | -1.10827400 |
| C | 4.64924900  | 3.45413800  | -1.01190700 |
| C | 4.46366700  | 1.10377500  | -1.50618900 |
| C | 6.00948000  | 3.40881300  | -1.31104200 |
| H | 4.19036900  | 4.39118700  | -0.70584000 |
| C | 5.82348800  | 1.05406000  | -1.79086600 |
| H | 3.85534000  | 0.20470500  | -1.58590200 |
| C | 6.59920500  | 2.20825000  | -1.69591000 |
| H | 6.60823200  | 4.31133600  | -1.23926900 |
| H | 6.27321700  | 0.10884200  | -2.07802500 |
| H | 7.66025100  | 2.17152800  | -1.92080500 |
| C | -6.54827000 | -0.52398000 | 2.28232900  |
| H | -6.89734900 | -0.44259800 | 3.31649900  |
| H | -7.19063800 | 0.10463100  | 1.66172700  |
| H | -6.68161900 | -1.56368100 | 1.97251700  |
| C | -3.09202600 | 2.86393200  | 0.90181400  |
| H | -2.16152400 | 3.28328000  | 1.29259900  |
| H | -2.99663800 | 2.76994100  | -0.18662900 |

|   |             |             |             |
|---|-------------|-------------|-------------|
| H | -3.89694700 | 3.57658400  | 1.09218900  |
| C | -1.66223700 | -1.52042700 | 3.04613300  |
| H | -2.09588000 | -2.45439300 | 3.40790700  |
| H | -0.97070700 | -1.73967800 | 2.22376800  |
| H | -1.09038700 | -1.06304900 | 3.85809700  |
| C | -5.58980900 | 1.72038000  | -1.63673900 |
| C | -4.56736700 | 0.78469900  | -1.76704300 |
| C | -3.37038400 | 1.11846500  | -2.40679100 |
| C | -3.21838700 | 2.41287300  | -2.91129900 |
| C | -4.23806000 | 3.35224400  | -2.77907100 |
| C | -5.42696100 | 3.00929100  | -2.13943700 |
| H | -6.51698800 | 1.43975600  | -1.14515600 |
| H | -4.69556900 | -0.21880300 | -1.36539900 |
| H | -2.28454800 | 2.68418500  | -3.39442200 |
| H | -4.10284200 | 4.35366000  | -3.17535800 |
| H | -6.22363700 | 3.73950100  | -2.03927800 |
| C | -0.84961500 | 1.06169400  | -0.66590800 |
| O | -0.55141600 | 2.01452200  | -1.34950800 |
| C | -1.59283000 | -0.15270100 | -1.15026900 |
| H | -2.34312900 | -0.42360600 | -0.39553500 |
| C | -2.25754800 | 0.10153700  | -2.50213800 |
| H | -1.49977200 | 0.43638100  | -3.21744700 |
| H | -2.64988100 | -0.85533500 | -2.86239800 |
| C | 3.44806400  | -2.07965700 | -0.20104500 |
| C | 3.59018500  | -2.01179800 | 1.20782800  |
| C | 4.82241000  | -2.17178300 | 1.82884500  |
| C | 5.94628600  | -2.40932400 | 1.04006500  |
| C | 5.82329700  | -2.49231200 | -0.34984600 |
| C | 4.59127300  | -2.33225600 | -0.97228000 |
| H | 4.90746500  | -2.11939100 | 2.90994200  |
| H | 6.91569800  | -2.53696800 | 1.50961200  |
| H | 6.70410200  | -2.68900800 | -0.95399900 |
| H | 4.48802100  | -2.39861300 | -2.05107300 |
| N | 2.19140000  | -1.85242200 | -0.71139500 |
| S | 2.01588000  | -1.72550700 | 1.92608300  |
| C | 1.30997200  | -1.62611000 | 0.24772200  |
| N | 0.04144900  | -1.28742900 | 0.18053700  |
| C | -0.52801600 | -1.28305300 | -1.15638900 |
| H | 0.22433000  | -1.03755500 | -1.92265400 |
| C | -1.15471700 | -2.61579500 | -1.51457600 |
| C | -2.13567600 | -3.17024300 | -0.68652600 |
| C | -0.76505500 | -3.30503200 | -2.66074600 |
| C | -2.72450100 | -4.38662500 | -1.00987400 |
| H | -2.42208800 | -2.64563700 | 0.22329300  |

|   |             |             |             |
|---|-------------|-------------|-------------|
| C | -1.35163200 | -4.52758300 | -2.98489100 |
| H | 0.01497500  | -2.88584000 | -3.29038500 |
| C | -2.33469000 | -5.06806400 | -2.16307000 |
| H | -3.48475300 | -4.81013800 | -0.36072400 |
| H | -1.03555700 | -5.05857500 | -3.87730800 |
| H | -2.79258300 | -6.01962900 | -2.41383400 |

**5(SS)**

|   |             |             |             |
|---|-------------|-------------|-------------|
| C | -0.25988300 | 0.21459400  | -1.04946100 |
| C | -1.63859400 | -0.20757200 | -2.67891400 |
| C | -3.06859400 | -0.33636400 | -3.09649200 |
| C | -3.81731500 | -0.21168500 | -1.73793100 |
| C | -2.84722700 | 0.47205000  | -0.73999100 |
| H | -3.32980900 | 0.45713000  | -3.80282100 |
| H | -3.25006500 | -1.30107300 | -3.57315800 |
| H | -4.08019300 | -1.20566600 | -1.37279200 |
| H | -2.82804200 | -0.02113200 | 0.23641200  |
| N | -0.45801100 | -0.42858800 | -3.19197800 |
| N | 0.39478900  | -0.14211200 | -2.15819100 |
| N | -1.55191600 | 0.22626300  | -1.39559500 |
| H | -4.73521600 | 0.37307400  | -1.82867200 |
| C | 1.82025400  | -0.18846900 | -2.32617100 |
| C | 2.50467600  | 1.02829900  | -2.39178800 |
| C | 2.44862200  | -1.43572800 | -2.35676200 |
| C | 3.89663000  | 0.97162800  | -2.43592700 |
| C | 3.84149700  | -1.43349200 | -2.41467100 |
| C | 4.57777600  | -0.24640300 | -2.43250500 |
| H | 4.45742700  | 1.90269700  | -2.46372600 |
| H | 4.36494300  | -2.38638200 | -2.42845400 |
| C | -3.10063000 | 1.97780000  | -0.58429300 |
| H | -3.26318400 | 2.41731900  | -1.57634000 |
| H | -2.21173400 | 2.43927500  | -0.14751800 |
| C | -4.29582300 | 2.21551600  | 0.30575100  |
| C | -5.49835400 | 2.70973700  | -0.19845500 |
| C | -4.20486200 | 1.90508400  | 1.66663700  |
| C | -6.59520200 | 2.89611900  | 0.64058100  |
| H | -5.57408400 | 2.95833000  | -1.25458000 |
| C | -5.29868900 | 2.08874100  | 2.50428000  |
| H | -3.26782200 | 1.51936800  | 2.06331100  |
| C | -6.49681200 | 2.58532900  | 1.99263500  |
| H | -7.52474200 | 3.28468200  | 0.23676100  |
| H | -5.21637300 | 1.84465500  | 3.55849100  |
| H | -7.34975000 | 2.72931200  | 2.64805700  |
| C | 6.08359300  | -0.28427100 | -2.41663200 |

|   |             |             |             |
|---|-------------|-------------|-------------|
| H | 6.45110800  | -0.37469800 | -1.38865900 |
| H | 6.46441800  | -1.13979900 | -2.97914100 |
| H | 6.50885900  | 0.62714900  | -2.84219600 |
| C | 1.77049100  | 2.34245400  | -2.36428600 |
| H | 0.90344500  | 2.32521800  | -3.03144600 |
| H | 1.42130600  | 2.58510800  | -1.35199400 |
| H | 2.43095100  | 3.15431600  | -2.67181300 |
| C | 1.65034000  | -2.70997500 | -2.32445400 |
| H | 2.31165400  | -3.57129100 | -2.21662900 |
| H | 0.93393800  | -2.70377900 | -1.49334900 |
| H | 1.08291300  | -2.82322000 | -3.25432100 |
| C | 3.74747500  | 4.02566300  | -0.00425500 |
| C | 3.46527100  | 2.84032400  | 0.66630200  |
| C | 2.22865100  | 2.64481700  | 1.29307100  |
| C | 1.27897000  | 3.66767500  | 1.23202600  |
| C | 1.55784900  | 4.85589300  | 0.55724500  |
| C | 2.79046500  | 5.03784300  | -0.06380700 |
| H | 4.71662100  | 4.16444600  | -0.47507900 |
| H | 4.20846000  | 2.04572800  | 0.71132100  |
| H | 0.31592500  | 3.52235400  | 1.71416500  |
| H | 0.81067000  | 5.64287700  | 0.52058100  |
| H | 3.00774700  | 5.96507000  | -0.58451200 |
| C | 0.20479400  | 0.59941800  | 0.33379300  |
| O | -0.64947800 | 1.13227600  | 1.01368500  |
| C | 1.57073200  | 0.27507800  | 0.86607200  |
| H | 2.31470000  | 0.31247200  | 0.06509800  |
| C | 1.93455700  | 1.31388000  | 1.94011400  |
| H | 1.11726500  | 1.38230500  | 2.66117100  |
| H | 2.82308100  | 0.96200900  | 2.46946700  |
| C | -1.85716300 | -2.69310700 | -0.19328200 |
| C | -2.84754400 | -2.80647200 | 0.81903600  |
| C | -4.10374500 | -3.32766300 | 0.54703700  |
| C | -4.39193400 | -3.77188800 | -0.74753300 |
| C | -3.42155300 | -3.69145500 | -1.74787100 |
| C | -2.16566600 | -3.14917500 | -1.48330400 |
| H | -4.84949400 | -3.40502500 | 1.33211500  |
| H | -5.36774400 | -4.19280600 | -0.96534200 |
| H | -3.64509900 | -4.05982400 | -2.74530100 |
| H | -1.40542700 | -3.08816600 | -2.25821700 |
| N | -0.65609700 | -2.15463900 | 0.18349900  |
| S | -2.19131400 | -2.22106200 | 2.33699900  |
| C | -0.60648400 | -1.91062200 | 1.50954600  |
| N | 0.39169900  | -1.47425100 | 2.21071500  |
| C | 1.55820100  | -1.22519700 | 1.41240700  |

|   |             |              |             |
|---|-------------|--------------|-------------|
| H | 1. 58158700 | -1. 85516900 | 0. 51101200 |
| C | 2. 84982700 | -1. 46616300 | 2. 16879000 |
| C | 2. 85543200 | -1. 67575900 | 3. 54628000 |
| C | 4. 06402400 | -1. 45673400 | 1. 47554900 |
| C | 4. 05985500 | -1. 86648200 | 4. 22114100 |
| H | 1. 90235100 | -1. 69268200 | 4. 06359100 |
| C | 5. 26598900 | -1. 64508800 | 2. 14968000 |
| H | 4. 06146300 | -1. 30806200 | 0. 39584100 |
| C | 5. 26699500 | -1. 84851600 | 3. 52874400 |
| H | 4. 05395200 | -2. 03184800 | 5. 29428700 |
| H | 6. 20263100 | -1. 64188500 | 1. 59961500 |
| H | 6. 20359100 | -1. 99828700 | 4. 05655200 |

**TS6(SR)**

|   |              |              |              |
|---|--------------|--------------|--------------|
| C | 0. 44419400  | -0. 44884900 | 0. 65336400  |
| C | 1. 60347100  | -1. 10804800 | 2. 39539300  |
| C | 2. 96389900  | -1. 29829100 | 2. 98954600  |
| C | 3. 86911100  | -1. 09005200 | 1. 74552600  |
| C | 3. 06057100  | -0. 19679700 | 0. 78175600  |
| H | 3. 13820600  | -0. 54590400 | 3. 76516000  |
| H | 3. 08023200  | -2. 28341300 | 3. 44388800  |
| H | 4. 05559700  | -2. 05275900 | 1. 26009700  |
| H | 3. 26299400  | -0. 40768100 | -0. 26154300 |
| N | 0. 36915000  | -1. 21102800 | 2. 78315100  |
| N | -0. 35151500 | -0. 79484700 | 1. 68648900  |
| N | 1. 68902400  | -0. 62908700 | 1. 12254800  |
| H | 4. 82994300  | -0. 63191600 | 1. 99075300  |
| C | -1. 72401600 | -0. 42741100 | 1. 94879700  |
| C | -1. 97587200 | 0. 94608800  | 2. 10187500  |
| C | -2. 68004000 | -1. 40936200 | 2. 20353600  |
| C | -3. 27539700 | 1. 32809900  | 2. 41677800  |
| C | -3. 95772500 | -0. 96832400 | 2. 56447600  |
| C | -4. 27846200 | 0. 38322600  | 2. 65549800  |
| H | -3. 50082200 | 2. 38838600  | 2. 50742600  |
| H | -4. 72489800 | -1. 71386900 | 2. 75963600  |
| C | 3. 19916000  | 1. 30947100  | 1. 04895000  |
| H | 3. 20074500  | 1. 50063800  | 2. 13042700  |
| H | 2. 32856900  | 1. 80329600  | 0. 60605200  |
| C | 4. 46046700  | 1. 82826000  | 0. 40599400  |
| C | 5. 59204800  | 2. 15796500  | 1. 15051000  |
| C | 4. 50434500  | 1. 94204100  | -0. 98843600 |
| C | 6. 75293100  | 2. 59913100  | 0. 51681900  |
| H | 5. 56213200  | 2. 07824400  | 2. 23517000  |
| C | 5. 66146300  | 2. 38136400  | -1. 62125900 |

|   |             |             |             |
|---|-------------|-------------|-------------|
| H | 3.61414400  | 1.68467000  | -1.56087500 |
| C | 6.78936900  | 2.71063400  | -0.86933500 |
| H | 7.62652700  | 2.85730500  | 1.10766200  |
| H | 5.68450600  | 2.47230600  | -2.70302300 |
| H | 7.69197200  | 3.05564400  | -1.36410600 |
| C | -5.66775000 | 0.83086200  | 3.03171000  |
| H | -6.01912500 | 1.62126600  | 2.36146000  |
| H | -6.37796000 | 0.00157600  | 2.98618400  |
| H | -5.68554800 | 1.23362700  | 4.05014900  |
| C | -0.87227000 | 1.96513900  | 1.97132100  |
| H | -0.03304800 | 1.70444100  | 2.62857200  |
| H | -0.48653700 | 2.04527800  | 0.94787900  |
| H | -1.23337000 | 2.95648300  | 2.25090400  |
| C | -2.39452000 | -2.87697500 | 2.06121600  |
| H | -2.53178000 | -3.16160600 | 1.01155600  |
| H | -1.37033500 | -3.12182100 | 2.35103000  |
| H | -3.08276300 | -3.45785400 | 2.68001700  |
| C | -2.41401300 | 4.41686900  | -0.08773900 |
| C | -2.39743800 | 3.25436900  | -0.85248200 |
| C | -1.21706000 | 2.81331000  | -1.46253400 |
| C | -0.05109300 | 3.56198800  | -1.28779800 |
| C | -0.06471800 | 4.72512000  | -0.51881400 |
| C | -1.24414000 | 5.15647900  | 0.08316100  |
| H | -3.34074800 | 4.74875300  | 0.37260600  |
| H | -3.30709900 | 2.66732400  | -0.97561000 |
| H | 0.87156800  | 3.20705800  | -1.73668700 |
| H | 0.85051000  | 5.29602300  | -0.39083200 |
| H | -1.25352200 | 6.06447600  | 0.67885600  |
| C | 0.24747100  | 0.00364700  | -0.83370700 |
| O | 1.19847000  | 0.73577900  | -1.19811500 |
| C | -1.21581300 | 0.30792200  | -1.24820000 |
| H | -1.76747700 | 0.60017500  | -0.35063400 |
| C | -1.22360900 | 1.50519900  | -2.21679000 |
| H | -0.35729000 | 1.43383400  | -2.87873700 |
| H | -2.13068900 | 1.45252300  | -2.82825900 |
| C | 1.68098400  | -2.27524700 | -1.48355500 |
| C | 1.71409700  | -3.48453200 | -0.75882100 |
| C | 2.89765000  | -4.19416800 | -0.60377900 |
| C | 4.06470300  | -3.68387900 | -1.17747700 |
| C | 4.03459700  | -2.49861500 | -1.91516500 |
| C | 2.84333200  | -1.79556100 | -2.08811000 |
| H | 2.91409900  | -5.13206500 | -0.05727900 |
| H | 4.99641800  | -4.22964900 | -1.06687100 |
| H | 4.94599900  | -2.12570300 | -2.37216900 |

|   |             |             |             |
|---|-------------|-------------|-------------|
| H | 2.79228800  | -0.87846800 | -2.66551200 |
| N | 0.43907700  | -1.66845600 | -1.55641900 |
| S | 0.10005000  | -3.91037800 | -0.19382300 |
| C | -0.55274600 | -2.44451100 | -1.01833700 |
| N | -1.78827500 | -2.11684500 | -1.02457100 |
| C | -1.97907100 | -0.91347600 | -1.83817100 |
| H | -1.54395300 | -1.08865300 | -2.83425600 |
| C | -3.44975600 | -0.59693000 | -1.99674400 |
| C | -4.23232600 | -0.33168800 | -0.87179600 |
| C | -4.04232300 | -0.53301100 | -3.25675400 |
| C | -5.57794000 | -0.00765100 | -1.00111500 |
| H | -3.77770700 | -0.38948600 | 0.11104700  |
| C | -5.39120600 | -0.20659300 | -3.39326200 |
| H | -3.44196900 | -0.74123500 | -4.13934500 |
| C | -6.16246900 | 0.05788000  | -2.26578900 |
| H | -6.17198200 | 0.18928200  | -0.11226000 |
| H | -5.83806000 | -0.16077300 | -4.38188300 |
| H | -7.21309800 | 0.31135800  | -2.37049800 |

**TS6(SS)**

|   |             |             |            |
|---|-------------|-------------|------------|
| C | 0.24076000  | -0.51922000 | 1.09925600 |
| C | 1.33764300  | -0.94360700 | 2.94695400 |
| C | 2.68308700  | -1.07703500 | 3.58780900 |
| C | 3.59785200  | -1.18155300 | 2.33670400 |
| C | 2.86022600  | -0.44215500 | 1.19572600 |
| H | 2.89705000  | -0.18519300 | 4.18474600 |
| H | 2.74613900  | -1.94596000 | 4.24313700 |
| H | 3.71367000  | -2.23349400 | 2.06193600 |
| H | 2.97231400  | -0.92116800 | 0.22469700 |
| N | 0.08651300  | -1.05221500 | 3.29135100 |
| N | -0.58781100 | -0.78668100 | 2.12383900 |
| N | 1.46225500  | -0.61710700 | 1.63314000 |
| H | 4.58952900  | -0.75494200 | 2.49942000 |
| C | -2.01989600 | -0.64540500 | 2.18809700 |
| C | -2.50817600 | 0.58577700  | 2.64138300 |
| C | -2.84285500 | -1.73314300 | 1.89292200 |
| C | -3.88984300 | 0.73626500  | 2.72286700 |
| C | -4.22029200 | -1.52202600 | 1.97302900 |
| C | -4.75885200 | -0.29723300 | 2.36492200 |
| H | -4.29705000 | 1.68743500  | 3.05673500 |
| H | -4.88781300 | -2.34283700 | 1.72440100 |
| C | 3.16861100  | 1.05717100  | 1.10425400 |
| H | 3.28887000  | 1.47270900  | 2.11321900 |
| H | 2.30939100  | 1.54186400  | 0.63171200 |



|   |              |              |              |
|---|--------------|--------------|--------------|
| C | 4. 39607800  | 1. 31692100  | 0. 27013100  |
| C | 5. 56178700  | 1. 84969900  | 0. 81734000  |
| C | 4. 35458400  | 1. 02187800  | -1. 09857300 |
| C | 6. 67480600  | 2. 09330200  | 0. 01343400  |
| H | 5. 59546800  | 2. 08741200  | 1. 87805600  |
| C | 5. 46454000  | 1. 26496200  | -1. 89932400 |
| H | 3. 43670300  | 0. 61075800  | -1. 51621200 |
| C | 6. 62714600  | 1. 80216600  | -1. 34561900 |
| H | 7. 57590900  | 2. 51245700  | 0. 45000700  |
| H | 5. 42331900  | 1. 03839500  | -2. 96006900 |
| H | 7. 49132800  | 1. 99344300  | -1. 97371000 |
| C | -6. 24756300 | -0. 07601000 | 2. 35403800  |
| H | -6. 56150800 | 0. 27041300  | 1. 36305700  |
| H | -6. 78975200 | -0. 99925800 | 2. 56960500  |
| H | -6. 54441900 | 0. 68043100  | 3. 08392900  |
| C | -1. 56691100 | 1. 68976800  | 3. 04413200  |
| H | -1. 02202500 | 1. 41371700  | 3. 95248800  |
| H | -0. 82503600 | 1. 89992200  | 2. 26536000  |
| H | -2. 11742700 | 2. 61191000  | 3. 23908800  |
| C | -2. 27414500 | -3. 07513500 | 1. 52511200  |
| H | -3. 06535500 | -3. 82551100 | 1. 48826300  |
| H | -1. 78065600 | -3. 03025100 | 0. 54934600  |
| H | -1. 53322800 | -3. 39360300 | 2. 26537100  |
| C | 0. 43004800  | 4. 43848100  | 0. 82723800  |
| C | -0. 36210900 | 3. 52882000  | 0. 12929200  |
| C | 0. 15453900  | 2. 79914800  | -0. 94587800 |
| C | 1. 47935400  | 3. 02833600  | -1. 32479400 |
| C | 2. 27305200  | 3. 94537300  | -0. 64092200 |
| C | 1. 75338700  | 4. 64700300  | 0. 44543600  |
| H | 0. 00978900  | 4. 99192200  | 1. 66216100  |
| H | -1. 40427900 | 3. 38745300  | 0. 41321000  |
| H | 1. 89379200  | 2. 45340600  | -2. 14716500 |
| H | 3. 30588100  | 4. 09202000  | -0. 94409700 |
| H | 2. 37281700  | 5. 35595600  | 0. 98567600  |
| C | 0. 07602100  | -0. 24427700 | -0. 42483300 |
| O | 1. 18807400  | 0. 04222000  | -0. 94503600 |
| C | -1. 17056900 | 0. 63028000  | -0. 78326100 |
| H | -1. 58847600 | 1. 03805700  | 0. 14557700  |
| C | -0. 71068200 | 1. 79762100  | -1. 67239500 |
| H | -0. 17289300 | 1. 38907500  | -2. 53016000 |
| H | -1. 60545200 | 2. 30661700  | -2. 04693200 |
| C | 0. 62914000  | -2. 82103900 | -0. 84614600 |
| C | 1. 08850500  | -3. 31412500 | -2. 08215700 |
| C | 2. 10647600  | -4. 25487900 | -2. 15289300 |

|   |              |              |              |
|---|--------------|--------------|--------------|
| C | 2. 67767600  | -4. 72313100 | -0. 97030100 |
| C | 2. 19794600  | -4. 28327600 | 0. 26126400  |
| C | 1. 16564400  | -3. 34771800 | 0. 33067100  |
| H | 2. 44854700  | -4. 62216000 | -3. 11476900 |
| H | 3. 47839400  | -5. 45353400 | -1. 01323600 |
| H | 2. 60913600  | -4. 69253800 | 1. 17909300  |
| H | 0. 75308600  | -3. 06537600 | 1. 29489100  |
| N | -0. 39838600 | -1. 87422400 | -0. 92461300 |
| S | 0. 15695700  | -2. 64270900 | -3. 41002000 |
| C | -0. 80925200 | -1. 69928400 | -2. 24081700 |
| N | -1. 72982600 | -0. 90122900 | -2. 60971300 |
| C | -2. 29223500 | -0. 20163600 | -1. 46978900 |
| H | -2. 63357100 | -0. 93154200 | -0. 71669400 |
| C | -3. 48196000 | 0. 65084200  | -1. 85836800 |
| C | -3. 84508600 | 0. 84224800  | -3. 19038600 |
| C | -4. 23220200 | 1. 27157700  | -0. 85570700 |
| C | -4. 94007500 | 1. 64302500  | -3. 51175000 |
| H | -3. 26046700 | 0. 35117200  | -3. 96006700 |
| C | -5. 32306400 | 2. 07274900  | -1. 17578900 |
| H | -3. 95690800 | 1. 11947400  | 0. 18524400  |
| C | -5. 68147900 | 2. 26124800  | -2. 50958500 |
| H | -5. 21388300 | 1. 78429300  | -4. 55288900 |
| H | -5. 89336500 | 2. 55126400  | -0. 38440400 |
| H | -6. 53268400 | 2. 88491800  | -2. 76378800 |

**6(RR)**

|   |              |              |             |
|---|--------------|--------------|-------------|
| C | -0. 03230000 | -1. 09462800 | 0. 76601200 |
| C | 0. 78823600  | -1. 98588000 | 2. 59476800 |
| C | 2. 00584100  | -2. 27745500 | 3. 40659300 |
| C | 3. 11152400  | -2. 10433800 | 2. 33869800 |
| C | 2. 56810900  | -1. 08172200 | 1. 30761100 |
| H | 2. 09868800  | -1. 54724600 | 4. 21685300 |
| H | 1. 98089500  | -3. 27384400 | 3. 84795400 |
| H | 3. 28037200  | -3. 06023500 | 1. 83658700 |
| H | 2. 87163500  | -1. 34344200 | 0. 29371400 |
| N | -0. 48587200 | -2. 21147500 | 2. 67812000 |
| N | -0. 98486800 | -1. 65450400 | 1. 52780300 |
| N | 1. 10914300  | -1. 31304100 | 1. 44419600 |
| H | 4. 06053800  | -1. 76607100 | 2. 75686100 |
| C | -2. 38667200 | -1. 85190200 | 1. 23305000 |
| C | -3. 33075700 | -0. 97159000 | 1. 76232200 |
| C | -2. 73737800 | -2. 99675800 | 0. 50865900 |
| C | -4. 67436500 | -1. 23754400 | 1. 50295300 |
| C | -4. 09281700 | -3. 22382400 | 0. 29247100 |

|   |             |             |             |
|---|-------------|-------------|-------------|
| C | -5.07220700 | -2.35651700 | 0.77765800  |
| H | -5.42445300 | -0.54222400 | 1.87312100  |
| H | -4.39019500 | -4.10341900 | -0.27305400 |
| C | 2.94799000  | 0.36952800  | 1.62363200  |
| H | 2.58885800  | 0.62731000  | 2.62800400  |
| H | 2.45095600  | 1.03788200  | 0.91258100  |
| C | 4.44455200  | 0.55625800  | 1.53928600  |
| C | 5.20025400  | 0.86048300  | 2.67218300  |
| C | 5.09786900  | 0.39630200  | 0.31366600  |
| C | 6.58226800  | 1.01178700  | 2.58484800  |
| H | 4.70062800  | 0.99056800  | 3.62925400  |
| C | 6.47768600  | 0.54388700  | 0.22505500  |
| H | 4.52130200  | 0.16477100  | -0.57965500 |
| C | 7.22380200  | 0.85289200  | 1.36056900  |
| H | 7.15547000  | 1.25661200  | 3.47332100  |
| H | 6.96985200  | 0.42217100  | -0.73447500 |
| H | 8.30007600  | 0.97214900  | 1.28969100  |
| C | -6.53437300 | -2.62316000 | 0.53647500  |
| H | -7.04602200 | -1.70511200 | 0.23450600  |
| H | -6.67818000 | -3.37145200 | -0.24628100 |
| H | -7.01946000 | -2.99066500 | 1.44654000  |
| C | -2.96627700 | 0.22573900  | 2.59826700  |
| H | -3.30371600 | 1.14299800  | 2.10421900  |
| H | -3.45669400 | 0.16819900  | 3.57405400  |
| H | -1.88981300 | 0.30099500  | 2.76953800  |
| C | -1.69424000 | -3.93286400 | -0.03157500 |
| H | -1.21375200 | -3.44669900 | -0.88636700 |
| H | -0.93057000 | -4.15423600 | 0.72198500  |
| H | -2.14725300 | -4.87512100 | -0.34501500 |
| C | -5.24026500 | -0.34431600 | -1.77155600 |
| C | -3.87143400 | -0.14537800 | -1.92997800 |
| C | -3.28393800 | 1.05833000  | -1.53519100 |
| C | -4.07959800 | 2.03698800  | -0.92982800 |
| C | -5.44529900 | 1.82840500  | -0.75309400 |
| C | -6.03258700 | 0.64182200  | -1.18790900 |
| H | -5.68881700 | -1.28018900 | -2.09565100 |
| H | -3.23117900 | -0.92181600 | -2.33905300 |
| H | -3.62263200 | 2.97191500  | -0.60557500 |
| H | -6.05428400 | 2.60101000  | -0.29259000 |
| H | -7.10248700 | 0.48938200  | -1.07395100 |
| C | -0.31925100 | -0.47239000 | -0.64904300 |
| O | -0.91651000 | -1.33285600 | -1.38661900 |
| C | -1.03795800 | 0.89822000  | -0.42081500 |
| H | -1.77344300 | 0.72475600  | 0.37051100  |

|   |             |             |             |
|---|-------------|-------------|-------------|
| C | -1.80052700 | 1.28287600  | -1.70324300 |
| H | -1.61541200 | 2.33321500  | -1.94468500 |
| H | -1.42980300 | 0.67200700  | -2.53021800 |
| C | 1.84270400  | -1.02219600 | -1.94407300 |
| C | 2.83104700  | -0.43066600 | -2.74773800 |
| C | 3.70476700  | -1.20275500 | -3.50132400 |
| C | 3.58242800  | -2.59027100 | -3.45685400 |
| C | 2.60014100  | -3.18197600 | -2.66483800 |
| C | 1.72516300  | -2.41226800 | -1.90110900 |
| H | 4.46388300  | -0.73024800 | -4.11619900 |
| H | 4.25263300  | -3.20747700 | -4.04521500 |
| H | 2.50573000  | -4.26279400 | -2.64385700 |
| H | 0.93830800  | -2.86427700 | -1.31030000 |
| N | 1.11715300  | -0.10268400 | -1.18687900 |
| S | 2.78591900  | 1.32438100  | -2.62125000 |
| C | 1.46290900  | 1.21589700  | -1.42671600 |
| N | 0.98271900  | 2.26147900  | -0.88208300 |
| C | -0.07234100 | 1.99272600  | 0.08137600  |
| H | 0.38196300  | 1.61423500  | 1.01863100  |
| C | -0.82300100 | 3.26210400  | 0.42886400  |
| C | -0.89015600 | 4.33175400  | -0.46462400 |
| C | -1.52715500 | 3.34565400  | 1.63097900  |
| C | -1.68292900 | 5.44100300  | -0.17806400 |
| H | -0.30643300 | 4.28254200  | -1.37817900 |
| C | -2.32008100 | 4.45141700  | 1.92076300  |
| H | -1.44925700 | 2.53485100  | 2.35036100  |
| C | -2.40863500 | 5.50075400  | 1.00883700  |
| H | -1.73235000 | 6.26292300  | -0.88561300 |
| H | -2.86292100 | 4.49701100  | 2.85999300  |
| H | -3.02726300 | 6.36483000  | 1.22944300  |

**6(RS)**

|   |             |            |             |
|---|-------------|------------|-------------|
| C | -0.33704800 | 0.86132700 | 0.84908100  |
| C | 0.44840700  | 2.90506100 | 0.76108200  |
| C | 1.63635200  | 3.77452500 | 0.52866000  |
| C | 2.77670500  | 2.77905400 | 0.83785000  |
| C | 2.24142100  | 1.37579600 | 0.45189000  |
| H | 1.64975900  | 4.09190800 | -0.52000500 |
| H | 1.64141500  | 4.66081200 | 1.16264000  |
| H | 2.99468000  | 2.80137900 | 1.90878800  |
| H | 2.58172300  | 0.61617900 | 1.15706000  |
| N | -0.80551000 | 3.06608000 | 1.04801400  |
| N | -1.28636600 | 1.78107000 | 1.11670000  |
| N | 0.78198200  | 1.57926500 | 0.65983700  |

|   |             |             |             |
|---|-------------|-------------|-------------|
| H | 3.69679000  | 3.00350400  | 0.29641800  |
| C | -2.61608000 | 1.59241500  | 1.66062700  |
| C | -3.74044900 | 1.84925700  | 0.87126900  |
| C | -2.71425400 | 1.28984600  | 3.02612400  |
| C | -4.99471200 | 1.69035100  | 1.46457900  |
| C | -3.98891300 | 1.14698900  | 3.56509300  |
| C | -5.14025000 | 1.31790000  | 2.79759500  |
| H | -5.87994500 | 1.87977900  | 0.86161300  |
| H | -4.08217000 | 0.90180100  | 4.62020600  |
| C | 2.58019900  | 0.97099600  | -0.98238600 |
| H | 2.16889100  | 1.71097100  | -1.67820700 |
| H | 2.09571400  | 0.01890300  | -1.20692100 |
| C | 4.07185700  | 0.84177400  | -1.17039300 |
| C | 4.75004500  | 1.65812400  | -2.07625800 |
| C | 4.79922000  | -0.09637800 | -0.43076500 |
| C | 6.12824200  | 1.54286700  | -2.24419700 |
| H | 4.18605700  | 2.38054400  | -2.66221900 |
| C | 6.17556700  | -0.20964200 | -0.59377600 |
| H | 4.28379000  | -0.75099500 | 0.27044600  |
| C | 6.84430300  | 0.60986100  | -1.50067600 |
| H | 6.64095600  | 2.18086800  | -2.95724400 |
| H | 6.72632600  | -0.94493800 | -0.01565700 |
| H | 7.91787600  | 0.51752600  | -1.63010700 |
| C | -6.50403300 | 1.11067800  | 3.40158400  |
| H | -7.27188400 | 1.65547400  | 2.84785300  |
| H | -6.77170600 | 0.04925900  | 3.38646800  |
| H | -6.52900400 | 1.44147300  | 4.44274400  |
| C | -3.66461100 | 2.30929400  | -0.56090600 |
| H | -4.58671100 | 2.82962600  | -0.82767400 |
| H | -2.83270700 | 3.00030900  | -0.71739000 |
| H | -3.55823600 | 1.46588400  | -1.25291000 |
| C | -1.50280100 | 1.11965100  | 3.89822700  |
| H | -1.12867800 | 0.10093600  | 3.76364600  |
| H | -0.70861000 | 1.82196100  | 3.62234100  |
| H | -1.75992800 | 1.29371800  | 4.94479800  |
| C | -5.78009800 | -1.31479700 | -1.67453400 |
| C | -4.66648200 | -1.35135600 | -0.84277900 |
| C | -3.59811700 | -2.21632900 | -1.10875800 |
| C | -3.68070200 | -3.05026000 | -2.22526300 |
| C | -4.79766700 | -3.02049100 | -3.05891400 |
| C | -5.84923700 | -2.15121000 | -2.78796200 |
| H | -6.60038700 | -0.63891400 | -1.44978700 |
| H | -4.61877200 | -0.70815400 | 0.03493300  |
| H | -2.85776400 | -3.72782500 | -2.44068100 |

|   |             |             |             |
|---|-------------|-------------|-------------|
| H | -4.84347500 | -3.67755900 | -3.92198100 |
| H | -6.71936400 | -2.12713100 | -3.43627100 |
| C | -0.63870600 | -0.68302400 | 0.81118700  |
| O | -1.14193100 | -1.04682400 | 1.93359400  |
| C | -1.52883400 | -0.93557700 | -0.47073100 |
| H | -2.23089000 | -0.09547400 | -0.52493700 |
| C | -2.38120900 | -2.19479000 | -0.22027700 |
| H | -1.77004100 | -3.08902300 | -0.38584200 |
| H | -2.66550100 | -2.17709000 | 0.83452400  |
| C | 1.59985600  | -1.68427500 | 1.55030800  |
| C | 2.57024600  | -2.63355500 | 1.19125900  |
| C | 3.57004100  | -3.01507500 | 2.07597200  |
| C | 3.59700900  | -2.44321100 | 3.34649100  |
| C | 2.63150300  | -1.50705400 | 3.71136000  |
| C | 1.62759000  | -1.11900000 | 2.82614300  |
| H | 4.31294000  | -3.74830200 | 1.77854800  |
| H | 4.36882600  | -2.73425600 | 4.05070800  |
| H | 2.65172700  | -1.07435500 | 4.70634800  |
| H | 0.85671800  | -0.41717300 | 3.11702500  |
| N | 0.73267800  | -1.35296000 | 0.50860300  |
| S | 2.33975500  | -3.18354000 | -0.46096200 |
| C | 0.93044100  | -2.09844400 | -0.64482400 |
| N | 0.29215300  | -2.06359700 | -1.74325000 |
| C | -0.78256600 | -1.07156200 | -1.81284700 |
| H | -1.52141200 | -1.47702400 | -2.51805300 |
| C | -0.24678700 | 0.19292400  | -2.49334700 |
| C | 0.68193300  | 0.04640300  | -3.53398500 |
| C | -0.67108500 | 1.48199500  | -2.17717000 |
| C | 1.17881300  | 1.15284200  | -4.21230000 |
| H | 1.02594200  | -0.95156000 | -3.78472600 |
| C | -0.17409100 | 2.59855000  | -2.85229500 |
| H | -1.40501600 | 1.63048900  | -1.39860400 |
| C | 0.75724000  | 2.43979600  | -3.87249000 |
| H | 1.90241800  | 1.01177200  | -5.00934500 |
| H | -0.52896300 | 3.58910000  | -2.57865800 |
| H | 1.14430600  | 3.30350100  | -4.40440200 |

**6(SR)**

|   |            |             |            |
|---|------------|-------------|------------|
| C | 0.44475100 | -0.49314400 | 0.70429600 |
| C | 1.57719200 | -1.02464900 | 2.51171700 |
| C | 2.92783300 | -1.14709900 | 3.14510200 |
| C | 3.85479100 | -1.00850800 | 1.90757500 |
| C | 3.05172200 | -0.19845400 | 0.86957500 |
| H | 3.07085600 | -0.33814700 | 3.86764900 |

|   |             |             |             |
|---|-------------|-------------|-------------|
| H | 3.05232800  | -2.09430400 | 3.67106000  |
| H | 4.06661800  | -1.99957000 | 1.49506800  |
| H | 3.27680000  | -0.47205100 | -0.15398200 |
| N | 0.33704300  | -1.12608600 | 2.88069300  |
| N | -0.36585700 | -0.79407800 | 1.74130500  |
| N | 1.68072300  | -0.62950300 | 1.21154900  |
| H | 4.80292500  | -0.51789900 | 2.13706600  |
| C | -1.74551600 | -0.42090300 | 1.95848600  |
| C | -1.98603300 | 0.95372400  | 2.11666600  |
| C | -2.72165600 | -1.39179000 | 2.16944600  |
| C | -3.28984800 | 1.34978600  | 2.39269300  |
| C | -4.00615300 | -0.93947600 | 2.49027900  |
| C | -4.31196500 | 0.41485100  | 2.58765300  |
| H | -3.50471700 | 2.41162200  | 2.48707500  |
| H | -4.78795300 | -1.67768100 | 2.65101500  |
| C | 3.15580200  | 1.32535600  | 1.03467900  |
| H | 3.17459400  | 1.58872400  | 2.10041200  |
| H | 2.26326300  | 1.76181700  | 0.57571400  |
| C | 4.38572300  | 1.83572400  | 0.32893800  |
| C | 5.52470700  | 2.24415100  | 1.02075100  |
| C | 4.38928100  | 1.86086200  | -1.07091800 |
| C | 6.65512000  | 2.67741500  | 0.32933200  |
| H | 5.52394100  | 2.23304000  | 2.10842800  |
| C | 5.51649700  | 2.29303300  | -1.75999800 |
| H | 3.49078500  | 1.53920300  | -1.59688800 |
| C | 6.65253400  | 2.70175400  | -1.06123100 |
| H | 7.53546100  | 2.99629900  | 0.87864500  |
| H | 5.51014900  | 2.31621200  | -2.84530400 |
| H | 7.53132300  | 3.03981100  | -1.60116600 |
| C | -5.70457900 | 0.87498500  | 2.93357400  |
| H | -6.43666400 | 0.08023700  | 2.77461300  |
| H | -5.76220800 | 1.17876200  | 3.98383600  |
| H | -5.99406600 | 1.73743500  | 2.32717900  |
| C | -0.86092000 | 1.95226200  | 2.03433400  |
| H | -0.06143700 | 1.67827700  | 2.73332500  |
| H | -0.42507200 | 2.01407500  | 1.03010600  |
| H | -1.21483100 | 2.95168800  | 2.28964700  |
| C | -2.44658200 | -2.86090200 | 2.02896200  |
| H | -2.64402000 | -3.15953300 | 0.99360000  |
| H | -1.40864700 | -3.10280500 | 2.26397900  |
| H | -3.09915700 | -3.43384100 | 2.69126500  |
| C | -2.11673300 | 4.46882200  | -0.06809200 |
| C | -2.15449000 | 3.31568200  | -0.84656100 |
| C | -0.98483700 | 2.79169400  | -1.40827600 |

|   |             |             |             |
|---|-------------|-------------|-------------|
| C | 0.22681700  | 3.44410700  | -1.16838200 |
| C | 0.26715200  | 4.59640800  | -0.38457800 |
| C | -0.90290900 | 5.11332400  | 0.16676500  |
| H | -3.03530400 | 4.86710300  | 0.35371400  |
| H | -3.09919600 | 2.80156500  | -1.01926200 |
| H | 1.13773300  | 3.01798900  | -1.57782200 |
| H | 1.21731100  | 5.09143700  | -0.20623800 |
| H | -0.87097800 | 6.01319100  | 0.77333600  |
| C | 0.30400600  | -0.17901900 | -0.86031900 |
| O | 1.30322600  | 0.53254300  | -1.21784000 |
| C | -1.14144900 | 0.28201900  | -1.25271500 |
| H | -1.67580700 | 0.58520900  | -0.34898100 |
| C | -1.05291200 | 1.50155700  | -2.18829400 |
| H | -0.17198100 | 1.39067000  | -2.82414800 |
| H | -1.94451100 | 1.52177300  | -2.82336100 |
| C | 1.62216700  | -2.37880000 | -1.37028500 |
| C | 1.54085300  | -3.64564800 | -0.76758800 |
| C | 2.66690200  | -4.44653700 | -0.63029500 |
| C | 3.88809500  | -3.97143800 | -1.10938400 |
| C | 3.96566500  | -2.73068500 | -1.74351600 |
| C | 2.83300300  | -1.93343000 | -1.89710900 |
| H | 2.59400700  | -5.42668300 | -0.17059200 |
| H | 4.77627000  | -4.58699000 | -1.01181200 |
| H | 4.91573000  | -2.38472000 | -2.13776100 |
| H | 2.86135900  | -0.97162200 | -2.39544200 |
| N | 0.40628800  | -1.69578800 | -1.43259400 |
| S | -0.12053100 | -4.03135500 | -0.31710100 |
| C | -0.66232500 | -2.47297600 | -1.02502000 |
| N | -1.87711100 | -2.10283800 | -1.10949500 |
| C | -1.97714400 | -0.85937700 | -1.88564100 |
| H | -1.54006500 | -1.04567800 | -2.87980700 |
| C | -3.42118100 | -0.44707900 | -2.05665900 |
| C | -4.20417000 | -0.18829000 | -0.93120000 |
| C | -3.98385200 | -0.28240700 | -3.32090400 |
| C | -5.52250400 | 0.23092700  | -1.06422600 |
| H | -3.77083600 | -0.32682500 | 0.05292700  |
| C | -5.30556000 | 0.13923600  | -3.46042000 |
| H | -3.38224100 | -0.48655300 | -4.20330900 |
| C | -6.07765800 | 0.39818600  | -2.33265000 |
| H | -6.11708500 | 0.42538400  | -0.17553200 |
| H | -5.73093500 | 0.26407600  | -4.45132900 |
| H | -7.10650100 | 0.72714400  | -2.44017100 |

**6(SS)**



|   |             |             |             |
|---|-------------|-------------|-------------|
| C | 0.15708700  | -0.81956600 | 1.14748100  |
| C | 1.12357500  | -1.32451200 | 3.05725900  |
| C | 2.41166400  | -1.53363500 | 3.78519400  |
| C | 3.39603400  | -1.72620400 | 2.60241400  |
| C | 2.77737500  | -0.99431200 | 1.38486500  |
| H | 2.64643000  | -0.64337200 | 4.37671100  |
| H | 2.37407900  | -2.38833600 | 4.46075600  |
| H | 3.48583600  | -2.79268900 | 2.38047000  |
| H | 2.89234500  | -1.54210000 | 0.45343600  |
| N | -0.14584400 | -1.33938600 | 3.33690200  |
| N | -0.73232600 | -1.02936400 | 2.13636400  |
| N | 1.34341400  | -1.02001600 | 1.74755100  |
| H | 4.39501900  | -1.34100600 | 2.81546600  |
| C | -2.15066100 | -0.80954500 | 2.09274200  |
| C | -2.60783600 | 0.40893100  | 2.61944000  |
| C | -2.99205800 | -1.74504500 | 1.49560900  |
| C | -3.95002100 | 0.71732800  | 2.44916200  |
| C | -4.33263700 | -1.37668700 | 1.33772900  |
| C | -4.81969700 | -0.15078700 | 1.77800600  |
| H | -4.32298700 | 1.67163900  | 2.81270700  |
| H | -5.00435800 | -2.07103100 | 0.83912500  |
| C | 3.27453000  | 0.43985200  | 1.18917500  |
| H | 3.34159800  | 0.95072600  | 2.15808600  |
| H | 2.55011800  | 0.96349200  | 0.55666400  |
| C | 4.61364200  | 0.42895900  | 0.49497900  |
| C | 5.75211500  | 0.98180600  | 1.07700200  |
| C | 4.70683100  | -0.13613300 | -0.78332400 |
| C | 6.96826900  | 0.98301300  | 0.39444400  |
| H | 5.68383900  | 1.43039900  | 2.06511800  |
| C | 5.91948300  | -0.14022600 | -1.46193600 |
| H | 3.80557200  | -0.53683400 | -1.24523100 |
| C | 7.05426300  | 0.42175100  | -0.87508500 |
| H | 7.84641000  | 1.42368800  | 0.85593700  |
| H | 5.97996700  | -0.57337000 | -2.45547100 |
| H | 7.99974900  | 0.42227700  | -1.40790900 |
| C | -6.24324300 | 0.26226100  | 1.51591000  |
| H | -6.27384200 | 0.99821000  | 0.70610600  |
| H | -6.85773100 | -0.59021700 | 1.22059200  |
| H | -6.69083000 | 0.72347500  | 2.39999600  |
| C | -1.66299400 | 1.36149000  | 3.30367500  |
| H | -1.28217100 | 0.93201700  | 4.23451100  |
| H | -0.79501500 | 1.58868500  | 2.67267100  |
| H | -2.16943100 | 2.30041600  | 3.53448000  |
| C | -2.53153800 | -3.10183700 | 1.03621100  |

|   |             |             |             |
|---|-------------|-------------|-------------|
| H | -3.05099200 | -3.87531300 | 1.60980800  |
| H | -2.76926900 | -3.25324900 | -0.02105300 |
| H | -1.45800600 | -3.24820300 | 1.16097200  |
| C | 2.18150600  | 4.39648500  | -0.22901100 |
| C | 1.09229200  | 3.62830400  | -0.62796900 |
| C | 1.26579600  | 2.50069200  | -1.43904000 |
| C | 2.55687200  | 2.17208900  | -1.85286900 |
| C | 3.65089900  | 2.94088400  | -1.45970000 |
| C | 3.46757400  | 4.05176600  | -0.64137900 |
| H | 2.02689700  | 5.26789200  | 0.40049300  |
| H | 0.08636900  | 3.90349400  | -0.31350400 |
| H | 2.69868900  | 1.28351300  | -2.46040100 |
| H | 4.65094200  | 2.65305700  | -1.77220400 |
| H | 4.32067700  | 4.64521100  | -0.32764800 |
| C | 0.11553200  | -0.43607900 | -0.42237600 |
| O | 1.31839300  | -0.53164500 | -0.85955500 |
| C | -0.58202500 | 0.96361700  | -0.61703400 |
| H | -0.35666900 | 1.55528000  | 0.28050700  |
| C | 0.06836300  | 1.66625200  | -1.82863700 |
| H | 0.36292400  | 0.91520900  | -2.56435400 |
| H | -0.67963700 | 2.31828200  | -2.29240600 |
| C | -0.33317300 | -2.76477400 | -1.36077200 |
| C | -1.04824400 | -3.41814800 | -2.37654600 |
| C | -0.72673000 | -4.70750600 | -2.77572100 |
| C | 0.33304600  | -5.36095000 | -2.15019700 |
| C | 1.04973100  | -4.71907700 | -1.14308900 |
| C | 0.72780800  | -3.42459500 | -0.74179900 |
| H | -1.29258900 | -5.19344600 | -3.56368200 |
| H | 0.59874200  | -6.36790200 | -2.45262400 |
| H | 1.87909800  | -5.22917400 | -0.66407400 |
| H | 1.30419200  | -2.92686500 | 0.02602800  |
| N | -0.83550200 | -1.50066300 | -1.04350300 |
| S | -2.33876800 | -2.40016400 | -2.99930000 |
| C | -1.88420700 | -1.09997400 | -1.86243000 |
| N | -2.51566600 | 0.00074800  | -1.84540100 |
| C | -2.11876100 | 0.87891400  | -0.75786100 |
| H | -2.51787800 | 0.44627800  | 0.16384400  |
| C | -2.76227900 | 2.24643100  | -0.88688800 |
| C | -3.46451000 | 2.62040300  | -2.03190100 |
| C | -2.66128300 | 3.15925000  | 0.16827900  |
| C | -4.04425800 | 3.88482400  | -2.12293400 |
| H | -3.55106200 | 1.90226500  | -2.83960900 |
| C | -3.23859900 | 4.42169000  | 0.07888700  |
| H | -2.12263700 | 2.87646900  | 1.07057600  |

|   |             |            |             |
|---|-------------|------------|-------------|
| C | -3.93325600 | 4.78963700 | -1.07192500 |
| H | -4.58481100 | 4.16336400 | -3.02243700 |
| H | -3.14835000 | 5.11810300 | 0.90713900  |
| H | -4.38426300 | 5.77400700 | -1.14597600 |

**TS7(RR)**

|   |             |             |             |
|---|-------------|-------------|-------------|
| C | -0.39858000 | -1.44875000 | -0.08639500 |
| C | -1.59501000 | -3.17698400 | -0.81817800 |
| C | -2.95772400 | -3.68588200 | -1.15678100 |
| C | -3.85254300 | -2.65812900 | -0.42115400 |
| C | -3.01914900 | -1.35623600 | -0.30554600 |
| H | -3.10534300 | -3.65702000 | -2.24109500 |
| H | -3.11854700 | -4.71132600 | -0.82256900 |
| H | -4.07318100 | -3.02604300 | 0.58408500  |
| H | -3.20565900 | -0.85572100 | 0.64618600  |
| N | -0.37168800 | -3.59515000 | -0.90625200 |
| N | 0.34742400  | -2.51307800 | -0.44072600 |
| N | -1.65176000 | -1.90092700 | -0.31907400 |
| H | -4.79943700 | -2.47536700 | -0.93131900 |
| C | 1.78206200  | -2.58090900 | -0.43055600 |
| C | 2.46156900  | -2.20189100 | -1.59318900 |
| C | 2.43684700  | -3.02827300 | 0.71726700  |
| C | 3.85268600  | -2.18763700 | -1.55170000 |
| C | 3.83290100  | -2.99673600 | 0.70746700  |
| C | 4.55353600  | -2.55589600 | -0.40061900 |
| H | 4.40358700  | -1.88043800 | -2.43827700 |
| H | 4.36835300  | -3.32365700 | 1.59595100  |
| C | -3.21192500 | -0.38144000 | -1.47519100 |
| H | -2.88507700 | -0.87410200 | -2.39965100 |
| H | -2.55072800 | 0.48233900  | -1.32473700 |
| C | -4.64926200 | 0.06115100  | -1.61600500 |
| C | -5.34320400 | -0.15289300 | -2.80771700 |
| C | -5.32070700 | 0.66466900  | -0.54779200 |
| C | -6.67340300 | 0.23823400  | -2.94020200 |
| H | -4.83313300 | -0.62540000 | -3.64349000 |
| C | -6.65039700 | 1.05152600  | -0.67587100 |
| H | -4.80109300 | 0.83661600  | 0.39140100  |
| C | -7.33092000 | 0.84189600  | -1.87315500 |
| H | -7.19415000 | 0.06900100  | -3.87731000 |
| H | -7.15556100 | 1.52102200  | 0.16248900  |
| H | -8.36748300 | 1.14726200  | -1.97251400 |
| C | 6.05585600  | -2.46667600 | -0.36929600 |
| H | 6.49487600  | -2.85978800 | -1.29029800 |
| H | 6.36566200  | -1.42112100 | -0.26743300 |

|   |             |             |             |
|---|-------------|-------------|-------------|
| H | 6.46974600  | -3.02313200 | 0.47487100  |
| C | 1.70793600  | -1.85098600 | -2.84927000 |
| H | 1.00603700  | -1.02700700 | -2.68686600 |
| H | 2.39672000  | -1.55307000 | -3.64189600 |
| H | 1.12500700  | -2.71030700 | -3.19519800 |
| C | 1.66698400  | -3.53969600 | 1.90341200  |
| H | 1.13514700  | -2.71627300 | 2.38731600  |
| H | 0.93364200  | -4.28817400 | 1.58755500  |
| H | 2.34399600  | -4.00245000 | 2.62410900  |
| C | 5.35952300  | 0.14327100  | 1.90859400  |
| C | 3.98692000  | 0.36387200  | 1.91277100  |
| C | 3.45258800  | 1.53499500  | 1.36617600  |
| C | 4.31657100  | 2.47577400  | 0.80690900  |
| C | 5.69236500  | 2.25517900  | 0.79832000  |
| C | 6.21841800  | 1.09151800  | 1.35194100  |
| H | 5.76166100  | -0.77091000 | 2.33752700  |
| H | 3.30394400  | -0.37525400 | 2.32924900  |
| H | 3.90455600  | 3.37214500  | 0.34805400  |
| H | 6.35261400  | 2.99304400  | 0.35249500  |
| H | 7.29099700  | 0.92103000  | 1.34901100  |
| C | 0.18253000  | -0.03824600 | 1.19818300  |
| O | 0.47684500  | -0.66804900 | 2.22321200  |
| C | 1.26433900  | 0.69919200  | 0.40488300  |
| H | 1.99486600  | -0.06400700 | 0.12364300  |
| C | 1.95358300  | 1.71642800  | 1.35520300  |
| H | 1.69479200  | 2.73764100  | 1.05676600  |
| H | 1.57361800  | 1.56098800  | 2.36995100  |
| C | -2.03835500 | 0.67143800  | 2.22057300  |
| C | -2.98357900 | 1.70774300  | 2.13935000  |
| C | -4.08584000 | 1.74682100  | 2.98215500  |
| C | -4.24679400 | 0.73240900  | 3.92406700  |
| C | -3.31335500 | -0.29859800 | 4.00479300  |
| C | -2.20517200 | -0.34799600 | 3.15977700  |
| H | -4.80593400 | 2.55517200  | 2.90326800  |
| H | -5.10091600 | 0.74991300  | 4.59204600  |
| H | -3.44351100 | -1.08370900 | 4.74235000  |
| H | -1.46644400 | -1.13426100 | 3.22598300  |
| N | -1.04277200 | 0.78153500  | 1.24483300  |
| S | -2.59948200 | 2.84347300  | 0.85195800  |
| C | -1.16668300 | 1.88583800  | 0.40221000  |
| N | -0.42994200 | 2.23222400  | -0.56909600 |
| C | 0.71192400  | 1.37268500  | -0.86188700 |
| H | 0.35725000  | 0.58054400  | -1.53872300 |
| C | 1.80204000  | 2.14779500  | -1.58359800 |

|   |             |             |              |
|---|-------------|-------------|--------------|
| C | 1. 73054100 | 3. 53092700 | -1. 74229500 |
| C | 2. 93031000 | 1. 47034200 | -2. 05401900 |
| C | 2. 77484700 | 4. 22527100 | -2. 35251800 |
| H | 0. 84868700 | 4. 05062500 | -1. 38429200 |
| C | 3. 97070200 | 2. 16151900 | -2. 66311700 |
| H | 3. 01471200 | 0. 39610300 | -1. 90685700 |
| C | 3. 89795700 | 3. 54518600 | -2. 81266400 |
| H | 2. 70754100 | 5. 30306700 | -2. 46679200 |
| H | 4. 84720100 | 1. 62058300 | -3. 00710100 |
| H | 4. 71150000 | 4. 08710300 | -3. 28473900 |

**TS7(RS)**

|   |              |              |              |
|---|--------------|--------------|--------------|
| C | -0. 19413100 | -0. 31885300 | -1. 20599400 |
| C | -1. 36976500 | 0. 08459100  | -3. 04903400 |
| C | -2. 72015900 | 0. 34575800  | -3. 62921800 |
| C | -3. 63735300 | -0. 13737900 | -2. 47976400 |
| C | -2. 81170400 | 0. 00751600  | -1. 17650100 |
| H | -2. 83962200 | 1. 41562100  | -3. 82719700 |
| H | -2. 88534700 | -0. 19052800 | -4. 56421400 |
| H | -3. 87712800 | -1. 19386100 | -2. 62670200 |
| H | -3. 03004500 | -0. 80750400 | -0. 48725000 |
| N | -0. 14507600 | 0. 04842400  | -3. 46920000 |
| N | 0. 56143800  | -0. 20978200 | -2. 31663700 |
| N | -1. 44196500 | -0. 14232700 | -1. 69811800 |
| H | -4. 57249800 | 0. 42092600  | -2. 41884700 |
| C | 1. 99710500  | -0. 22262600 | -2. 36225800 |
| C | 2. 63468700  | 1. 01827600  | -2. 23228000 |
| C | 2. 69302500  | -1. 41847800 | -2. 53754600 |
| C | 4. 02294100  | 1. 02606300  | -2. 14415100 |
| C | 4. 08731800  | -1. 35385100 | -2. 45565700 |
| C | 4. 76243300  | -0. 15597400 | -2. 23169000 |
| H | 4. 53600100  | 1. 97549500  | -2. 01028900 |
| H | 4. 65635000  | -2. 27456100 | -2. 56960500 |
| C | -2. 95599600 | 1. 36458900  | -0. 48302100 |
| H | -2. 58713200 | 2. 14616000  | -1. 16033400 |
| H | -2. 28930000 | 1. 37013400  | 0. 38906100  |
| C | -4. 37137700 | 1. 69196200  | -0. 06269300 |
| C | -4. 81098800 | 3. 01690700  | -0. 10435200 |
| C | -5. 26165300 | 0. 70866400  | 0. 38165000  |
| C | -6. 09771500 | 3. 35944100  | 0. 29966300  |
| H | -4. 13128400 | 3. 78988400  | -0. 45436800 |
| C | -6. 55179400 | 1. 04750900  | 0. 77922500  |
| H | -4. 95224700 | -0. 33294300 | 0. 42212100  |
| C | -6. 97417900 | 2. 37328100  | 0. 74246300  |

|   |             |             |             |
|---|-------------|-------------|-------------|
| H | -6.41659000 | 4.39629500  | 0.26276000  |
| H | -7.22903100 | 0.27054600  | 1.12006400  |
| H | -7.98020100 | 2.63533500  | 1.05343000  |
| C | 6.26625100  | -0.12966300 | -2.13147700 |
| H | 6.60469700  | 0.71767400  | -1.52993100 |
| H | 6.64726800  | -1.04933500 | -1.67899900 |
| H | 6.72292400  | -0.03602000 | -3.12232100 |
| C | 1.83032000  | 2.28916700  | -2.24447000 |
| H | 1.25455800  | 2.35360900  | -3.17321100 |
| H | 1.12601500  | 2.33147000  | -1.40768100 |
| H | 2.48411300  | 3.15866800  | -2.17528500 |
| C | 2.01999700  | -2.72404500 | -2.86341300 |
| H | 2.19143500  | -3.45029900 | -2.06798400 |
| H | 0.94133100  | -2.60768800 | -2.96408500 |
| H | 2.42647600  | -3.11370100 | -3.80179700 |
| C | 5.80603900  | -0.32287800 | 1.66581200  |
| C | 4.59989000  | -0.92543500 | 1.32633700  |
| C | 3.57321400  | -1.05784600 | 2.26949800  |
| C | 3.79318600  | -0.58291300 | 3.56321800  |
| C | 5.00052100  | 0.02339600  | 3.90735400  |
| C | 6.00893000  | 0.15809100  | 2.95934900  |
| H | 6.59167600  | -0.23002100 | 0.92156300  |
| H | 4.43658400  | -1.28903300 | 0.31333400  |
| H | 3.00958300  | -0.68944000 | 4.30956100  |
| H | 5.15008200  | 0.39146700  | 4.91754300  |
| H | 6.94875500  | 0.63138700  | 3.22525600  |
| C | 0.37468700  | -1.44609100 | 0.22611800  |
| O | 0.71900400  | -2.48360300 | -0.37371600 |
| C | 1.45195800  | -0.63898400 | 0.97713900  |
| H | 2.13049500  | -0.27045800 | 0.20116500  |
| C | 2.24914600  | -1.64086400 | 1.84511400  |
| H | 1.65365000  | -1.92089500 | 2.72291100  |
| H | 2.40665900  | -2.54224000 | 1.24725200  |
| C | -1.88500600 | -2.46016900 | 0.82671000  |
| C | -3.02172000 | -2.17195900 | 1.60534900  |
| C | -4.17669500 | -2.93508800 | 1.50847100  |
| C | -4.19905300 | -4.00995400 | 0.62085000  |
| C | -3.07603500 | -4.29733400 | -0.15120500 |
| C | -1.91132100 | -3.53498000 | -0.06319000 |
| H | -5.04347000 | -2.69248400 | 2.11548000  |
| H | -5.09234200 | -4.61935900 | 0.53704900  |
| H | -3.09852300 | -5.13682300 | -0.83847500 |
| H | -1.03236500 | -3.75126800 | -0.65320300 |
| N | -0.85627300 | -1.53352100 | 1.02838300  |

|   |             |             |            |
|---|-------------|-------------|------------|
| S | -2.78911500 | -0.73793300 | 2.59659600 |
| C | -1.15335400 | -0.51081500 | 1.91815400 |
| N | -0.44715700 | 0.48213400  | 2.25904100 |
| C | 0.94281400  | 0.55389700  | 1.83230200 |
| H | 1.51861800  | 0.51729600  | 2.76851200 |
| C | 1.26875500  | 1.92922700  | 1.26792900 |
| C | 0.29190800  | 2.90854400  | 1.09097000 |
| C | 2.60754800  | 2.25850300  | 1.02190000 |
| C | 0.64133500  | 4.18856300  | 0.65922500 |
| H | -0.73824700 | 2.67086900  | 1.33288500 |
| C | 2.95608800  | 3.53777800  | 0.60540800 |
| H | 3.38325600  | 1.51041300  | 1.17554000 |
| C | 1.97262800  | 4.50919000  | 0.41847600 |
| H | -0.13081600 | 4.94083200  | 0.52807400 |
| H | 4.00065900  | 3.77869100  | 0.42945200 |
| H | 2.24569800  | 5.50853900  | 0.09407700 |

**TS7(SR)**

|   |             |             |             |
|---|-------------|-------------|-------------|
| C | -0.19413100 | -0.31885300 | -1.20599400 |
| C | -1.36976500 | 0.08459100  | -3.04903400 |
| C | -2.72015900 | 0.34575800  | -3.62921800 |
| C | -3.63735300 | -0.13737900 | -2.47976400 |
| C | -2.81170400 | 0.00751600  | -1.17650100 |
| H | -2.83962200 | 1.41562100  | -3.82719700 |
| H | -2.88534700 | -0.19052800 | -4.56421400 |
| H | -3.87712800 | -1.19386100 | -2.62670200 |
| H | -3.03004500 | -0.80750400 | -0.48725000 |
| N | -0.14507600 | 0.04842400  | -3.46920000 |
| N | 0.56143800  | -0.20978200 | -2.31663700 |
| N | -1.44196500 | -0.14232700 | -1.69811800 |
| H | -4.57249800 | 0.42092600  | -2.41884700 |
| C | 1.99710500  | -0.22262600 | -2.36225800 |
| C | 2.63468700  | 1.01827600  | -2.23228000 |
| C | 2.69302500  | -1.41847800 | -2.53754600 |
| C | 4.02294100  | 1.02606300  | -2.14415100 |
| C | 4.08731800  | -1.35385100 | -2.45565700 |
| C | 4.76243300  | -0.15597400 | -2.23169000 |
| H | 4.53600100  | 1.97549500  | -2.01028900 |
| H | 4.65635000  | -2.27456100 | -2.56960500 |
| C | -2.95599600 | 1.36458900  | -0.48302100 |
| H | -2.58713200 | 2.14616000  | -1.16033400 |
| H | -2.28930000 | 1.37013400  | 0.38906100  |
| C | -4.37137700 | 1.69196200  | -0.06269300 |
| C | -4.81098800 | 3.01690700  | -0.10435200 |

|   |             |             |             |
|---|-------------|-------------|-------------|
| C | -5.26165300 | 0.70866400  | 0.38165000  |
| C | -6.09771500 | 3.35944100  | 0.29966300  |
| H | -4.13128400 | 3.78988400  | -0.45436800 |
| C | -6.55179400 | 1.04750900  | 0.77922500  |
| H | -4.95224700 | -0.33294300 | 0.42212100  |
| C | -6.97417900 | 2.37328100  | 0.74246300  |
| H | -6.41659000 | 4.39629500  | 0.26276000  |
| H | -7.22903100 | 0.27054600  | 1.12006400  |
| H | -7.98020100 | 2.63533500  | 1.05343000  |
| C | 6.26625100  | -0.12966300 | -2.13147700 |
| H | 6.60469700  | 0.71767400  | -1.52993100 |
| H | 6.64726800  | -1.04933500 | -1.67899900 |
| H | 6.72292400  | -0.03602000 | -3.12232100 |
| C | 1.83032000  | 2.28916700  | -2.24447000 |
| H | 1.25455800  | 2.35360900  | -3.17321100 |
| H | 1.12601500  | 2.33147000  | -1.40768100 |
| H | 2.48411300  | 3.15866800  | -2.17528500 |
| C | 2.01999700  | -2.72404500 | -2.86341300 |
| H | 2.19143500  | -3.45029900 | -2.06798400 |
| H | 0.94133100  | -2.60768800 | -2.96408500 |
| H | 2.42647600  | -3.11370100 | -3.80179700 |
| C | 5.80603900  | -0.32287800 | 1.66581200  |
| C | 4.59989000  | -0.92543500 | 1.32633700  |
| C | 3.57321400  | -1.05784600 | 2.26949800  |
| C | 3.79318600  | -0.58291300 | 3.56321800  |
| C | 5.00052100  | 0.02339600  | 3.90735400  |
| C | 6.00893000  | 0.15809100  | 2.95934900  |
| H | 6.59167600  | -0.23002100 | 0.92156300  |
| H | 4.43658400  | -1.28903300 | 0.31333400  |
| H | 3.00958300  | -0.68944000 | 4.30956100  |
| H | 5.15008200  | 0.39146700  | 4.91754300  |
| H | 6.94875500  | 0.63138700  | 3.22525600  |
| C | 0.37468700  | -1.44609100 | 0.22611800  |
| O | 0.71900400  | -2.48360300 | -0.37371600 |
| C | 1.45195800  | -0.63898400 | 0.97713900  |
| H | 2.13049500  | -0.27045800 | 0.20116500  |
| C | 2.24914600  | -1.64086400 | 1.84511400  |
| H | 1.65365000  | -1.92089500 | 2.72291100  |
| H | 2.40665900  | -2.54224000 | 1.24725200  |
| C | -1.88500600 | -2.46016900 | 0.82671000  |
| C | -3.02172000 | -2.17195900 | 1.60534900  |
| C | -4.17669500 | -2.93508800 | 1.50847100  |
| C | -4.19905300 | -4.00995400 | 0.62085000  |
| C | -3.07603500 | -4.29733400 | -0.15120500 |



|   |             |             |             |
|---|-------------|-------------|-------------|
| C | -1.91132100 | -3.53498000 | -0.06319000 |
| H | -5.04347000 | -2.69248400 | 2.11548000  |
| H | -5.09234200 | -4.61935900 | 0.53704900  |
| H | -3.09852300 | -5.13682300 | -0.83847500 |
| H | -1.03236500 | -3.75126800 | -0.65320300 |
| N | -0.85627300 | -1.53352100 | 1.02838300  |
| S | -2.78911500 | -0.73793300 | 2.59659600  |
| C | -1.15335400 | -0.51081500 | 1.91815400  |
| N | -0.44715700 | 0.48213400  | 2.25904100  |
| C | 0.94281400  | 0.55389700  | 1.83230200  |
| H | 1.51861800  | 0.51729600  | 2.76851200  |
| C | 1.26875500  | 1.92922700  | 1.26792900  |
| C | 0.29190800  | 2.90854400  | 1.09097000  |
| C | 2.60754800  | 2.25850300  | 1.02190000  |
| C | 0.64133500  | 4.18856300  | 0.65922500  |
| H | -0.73824700 | 2.67086900  | 1.33288500  |
| C | 2.95608800  | 3.53777800  | 0.60540800  |
| H | 3.38325600  | 1.51041300  | 1.17554000  |
| C | 1.97262800  | 4.50919000  | 0.41847600  |
| H | -0.13081600 | 4.94083200  | 0.52807400  |
| H | 4.00065900  | 3.77869100  | 0.42945200  |
| H | 2.24569800  | 5.50853900  | 0.09407700  |

**TS7(SS)**

|   |             |             |             |
|---|-------------|-------------|-------------|
| C | -0.19413100 | -0.31885300 | -1.20599400 |
| C | -1.36976500 | 0.08459100  | -3.04903400 |
| C | -2.72015900 | 0.34575800  | -3.62921800 |
| C | -3.63735300 | -0.13737900 | -2.47976400 |
| C | -2.81170400 | 0.00751600  | -1.17650100 |
| H | -2.83962200 | 1.41562100  | -3.82719700 |
| H | -2.88534700 | -0.19052800 | -4.56421400 |
| H | -3.87712800 | -1.19386100 | -2.62670200 |
| H | -3.03004500 | -0.80750400 | -0.48725000 |
| N | -0.14507600 | 0.04842400  | -3.46920000 |
| N | 0.56143800  | -0.20978200 | -2.31663700 |
| N | -1.44196500 | -0.14232700 | -1.69811800 |
| H | -4.57249800 | 0.42092600  | -2.41884700 |
| C | 1.99710500  | -0.22262600 | -2.36225800 |
| C | 2.63468700  | 1.01827600  | -2.23228000 |
| C | 2.69302500  | -1.41847800 | -2.53754600 |
| C | 4.02294100  | 1.02606300  | -2.14415100 |
| C | 4.08731800  | -1.35385100 | -2.45565700 |
| C | 4.76243300  | -0.15597400 | -2.23169000 |
| H | 4.53600100  | 1.97549500  | -2.01028900 |

|   |             |             |             |
|---|-------------|-------------|-------------|
| H | 4.65635000  | -2.27456100 | -2.56960500 |
| C | -2.95599600 | 1.36458900  | -0.48302100 |
| H | -2.58713200 | 2.14616000  | -1.16033400 |
| H | -2.28930000 | 1.37013400  | 0.38906100  |
| C | -4.37137700 | 1.69196200  | -0.06269300 |
| C | -4.81098800 | 3.01690700  | -0.10435200 |
| C | -5.26165300 | 0.70866400  | 0.38165000  |
| C | -6.09771500 | 3.35944100  | 0.29966300  |
| H | -4.13128400 | 3.78988400  | -0.45436800 |
| C | -6.55179400 | 1.04750900  | 0.77922500  |
| H | -4.95224700 | -0.33294300 | 0.42212100  |
| C | -6.97417900 | 2.37328100  | 0.74246300  |
| H | -6.41659000 | 4.39629500  | 0.26276000  |
| H | -7.22903100 | 0.27054600  | 1.12006400  |
| H | -7.98020100 | 2.63533500  | 1.05343000  |
| C | 6.26625100  | -0.12966300 | -2.13147700 |
| H | 6.60469700  | 0.71767400  | -1.52993100 |
| H | 6.64726800  | -1.04933500 | -1.67899900 |
| H | 6.72292400  | -0.03602000 | -3.12232100 |
| C | 1.83032000  | 2.28916700  | -2.24447000 |
| H | 1.25455800  | 2.35360900  | -3.17321100 |
| H | 1.12601500  | 2.33147000  | -1.40768100 |
| H | 2.48411300  | 3.15866800  | -2.17528500 |
| C | 2.01999700  | -2.72404500 | -2.86341300 |
| H | 2.19143500  | -3.45029900 | -2.06798400 |
| H | 0.94133100  | -2.60768800 | -2.96408500 |
| H | 2.42647600  | -3.11370100 | -3.80179700 |
| C | 5.80603900  | -0.32287800 | 1.66581200  |
| C | 4.59989000  | -0.92543500 | 1.32633700  |
| C | 3.57321400  | -1.05784600 | 2.26949800  |
| C | 3.79318600  | -0.58291300 | 3.56321800  |
| C | 5.00052100  | 0.02339600  | 3.90735400  |
| C | 6.00893000  | 0.15809100  | 2.95934900  |
| H | 6.59167600  | -0.23002100 | 0.92156300  |
| H | 4.43658400  | -1.28903300 | 0.31333400  |
| H | 3.00958300  | -0.68944000 | 4.30956100  |
| H | 5.15008200  | 0.39146700  | 4.91754300  |
| H | 6.94875500  | 0.63138700  | 3.22525600  |
| C | 0.37468700  | -1.44609100 | 0.22611800  |
| O | 0.71900400  | -2.48360300 | -0.37371600 |
| C | 1.45195800  | -0.63898400 | 0.97713900  |
| H | 2.13049500  | -0.27045800 | 0.20116500  |
| C | 2.24914600  | -1.64086400 | 1.84511400  |
| H | 1.65365000  | -1.92089500 | 2.72291100  |

|   |             |             |             |
|---|-------------|-------------|-------------|
| H | 2.40665900  | -2.54224000 | 1.24725200  |
| C | -1.88500600 | -2.46016900 | 0.82671000  |
| C | -3.02172000 | -2.17195900 | 1.60534900  |
| C | -4.17669500 | -2.93508800 | 1.50847100  |
| C | -4.19905300 | -4.00995400 | 0.62085000  |
| C | -3.07603500 | -4.29733400 | -0.15120500 |
| C | -1.91132100 | -3.53498000 | -0.06319000 |
| H | -5.04347000 | -2.69248400 | 2.11548000  |
| H | -5.09234200 | -4.61935900 | 0.53704900  |
| H | -3.09852300 | -5.13682300 | -0.83847500 |
| H | -1.03236500 | -3.75126800 | -0.65320300 |
| N | -0.85627300 | -1.53352100 | 1.02838300  |
| S | -2.78911500 | -0.73793300 | 2.59659600  |
| C | -1.15335400 | -0.51081500 | 1.91815400  |
| N | -0.44715700 | 0.48213400  | 2.25904100  |
| C | 0.94281400  | 0.55389700  | 1.83230200  |
| H | 1.51861800  | 0.51729600  | 2.76851200  |
| C | 1.26875500  | 1.92922700  | 1.26792900  |
| C | 0.29190800  | 2.90854400  | 1.09097000  |
| C | 2.60754800  | 2.25850300  | 1.02190000  |
| C | 0.64133500  | 4.18856300  | 0.65922500  |
| H | -0.73824700 | 2.67086900  | 1.33288500  |
| C | 2.95608800  | 3.53777800  | 0.60540800  |
| H | 3.38325600  | 1.51041300  | 1.17554000  |
| C | 1.97262800  | 4.50919000  | 0.41847600  |
| H | -0.13081600 | 4.94083200  | 0.52807400  |
| H | 4.00065900  | 3.77869100  | 0.42945200  |
| H | 2.24569800  | 5.50853900  | 0.09407700  |

**P(RR)**

|   |             |             |             |
|---|-------------|-------------|-------------|
| C | 4.10931600  | 2.69447700  | -0.14157500 |
| C | 2.74574900  | 2.42225900  | -0.12921500 |
| C | 2.22737700  | 1.33601800  | -0.83972200 |
| C | 3.09985200  | 0.54460600  | -1.58465900 |
| C | 4.46615300  | 0.81094900  | -1.59588000 |
| C | 4.97617600  | 1.88329400  | -0.87076200 |
| H | 4.49580500  | 3.54157000  | 0.41682800  |
| H | 2.07178000  | 3.05903200  | 0.44079000  |
| H | 2.71036000  | -0.30743400 | -2.13441000 |
| H | 5.13211600  | 0.17055000  | -2.16593400 |
| H | 6.04169500  | 2.08960700  | -0.87581100 |
| C | -1.17146000 | 1.13059600  | 0.80912700  |
| O | -1.49260300 | 2.25042600  | 1.13411000  |
| C | 0.26907800  | 0.68150400  | 0.66403300  |

|   |             |             |             |
|---|-------------|-------------|-------------|
| H | 0.83128600  | 1.28800600  | 1.37865000  |
| C | 0.74644600  | 1.03271700  | -0.77121400 |
| H | 0.49526500  | 0.20682300  | -1.44648300 |
| H | 0.19053800  | 1.91422500  | -1.11113400 |
| C | -3.48598800 | 0.40424600  | 0.19940200  |
| C | -4.10340000 | -0.68000000 | -0.43636700 |
| C | -5.44825400 | -0.63897600 | -0.77279000 |
| C | -6.17858200 | 0.50652300  | -0.46410700 |
| C | -5.56472500 | 1.58246600  | 0.17140100  |
| C | -4.21380700 | 1.54779300  | 0.51420400  |
| H | -5.91748800 | -1.48377700 | -1.26530100 |
| H | -7.23141200 | 0.55420000  | -0.72016500 |
| H | -6.14293400 | 2.46799000  | 0.41178900  |
| H | -3.73171300 | 2.37844400  | 1.00814700  |
| N | -2.11432600 | 0.16142100  | 0.44259100  |
| S | -2.99112800 | -2.01688600 | -0.72430100 |
| C | -1.67513700 | -1.12939500 | 0.06681400  |
| N | -0.53368000 | -1.63064800 | 0.26270400  |
| C | 0.40773700  | -0.81112900 | 1.01926800  |
| H | 0.14007400  | -0.91721700 | 2.08406900  |
| C | 1.83096300  | -1.30618000 | 0.84218500  |
| C | 2.14388800  | -2.30978700 | -0.07020900 |
| C | 2.85834500  | -0.71163300 | 1.58091000  |
| C | 3.47055900  | -2.69625400 | -0.26029800 |
| H | 1.34134100  | -2.78064400 | -0.62669500 |
| C | 4.17990900  | -1.08695000 | 1.38275200  |
| H | 2.62607600  | 0.07041700  | 2.30066900  |
| C | 4.49071500  | -2.08149900 | 0.45591200  |
| H | 3.70339100  | -3.47921800 | -0.97574900 |
| H | 4.96947500  | -0.59996800 | 1.94606900  |
| H | 5.52379700  | -2.37512500 | 0.29827900  |

**P(RS)**

|   |            |             |             |
|---|------------|-------------|-------------|
| C | 5.27038400 | -1.63131900 | -0.95131700 |
| C | 3.92458200 | -1.62659600 | -1.30527800 |
| C | 2.93074800 | -1.65770500 | -0.32512300 |
| C | 3.30863900 | -1.68923400 | 1.01957100  |
| C | 4.65408700 | -1.69295200 | 1.37652400  |
| C | 5.63764900 | -1.66546300 | 0.39152100  |
| H | 6.03256700 | -1.61170300 | -1.72400100 |
| H | 3.63824200 | -1.60525500 | -2.35430500 |
| H | 2.53627800 | -1.70047600 | 1.78618100  |
| H | 4.93397600 | -1.71866200 | 2.42491000  |
| H | 6.68683300 | -1.67136100 | 0.66894600  |

|   |             |             |             |
|---|-------------|-------------|-------------|
| C | -0.49041000 | -0.27280400 | -1.35785500 |
| O | -0.85273900 | -0.33408100 | -2.51079200 |
| C | 0.95667200  | -0.16979700 | -0.92386100 |
| H | 1.51047000  | 0.27541000  | -1.75495100 |
| C | 1.47319400  | -1.61631600 | -0.70873200 |
| H | 0.87415100  | -2.10260300 | 0.06894800  |
| H | 1.31096400  | -2.16729100 | -1.64088900 |
| C | -2.73584200 | -0.77965700 | -0.37764400 |
| C | -3.28554500 | -1.06550900 | 0.87802700  |
| C | -4.60142200 | -1.48502000 | 1.00364100  |
| C | -5.37247800 | -1.61651700 | -0.14901300 |
| C | -4.82641100 | -1.32807500 | -1.39663900 |
| C | -3.50495000 | -0.90474500 | -1.53052100 |
| H | -5.01753400 | -1.70246100 | 1.98154500  |
| H | -6.40370000 | -1.94268300 | -0.06860700 |
| H | -5.43627000 | -1.42811600 | -2.28806800 |
| H | -3.07660000 | -0.67855100 | -2.49588400 |
| N | -1.38212600 | -0.38373300 | -0.28292500 |
| S | -2.13261400 | -0.82736800 | 2.18983500  |
| C | -0.89939200 | -0.27030600 | 1.04335400  |
| N | 0.22717700  | 0.16908100  | 1.41117100  |
| C | 1.07778400  | 0.69410000  | 0.33023500  |
| H | 2.11123700  | 0.63302400  | 0.68684300  |
| C | 0.74517200  | 2.16837000  | 0.11944500  |
| C | 0.37516200  | 2.70728700  | -1.11226500 |
| C | 0.82090400  | 3.01529900  | 1.23141300  |
| C | 0.09087000  | 4.06856800  | -1.23052600 |
| H | 0.29889800  | 2.08196800  | -1.99670200 |
| C | 0.53982200  | 4.36915100  | 1.11311200  |
| H | 1.09370900  | 2.59301300  | 2.19442300  |
| C | 0.17351200  | 4.90181400  | -0.12285100 |
| H | -0.19835600 | 4.47121500  | -2.19604900 |
| H | 0.60446700  | 5.01206500  | 1.98527400  |
| H | -0.04735000 | 5.96012300  | -0.21767600 |

**P(SR)**

|   |            |            |             |
|---|------------|------------|-------------|
| C | 4.43945100 | 1.97214600 | -0.91853800 |
| C | 3.63448000 | 1.24689700 | -0.04364900 |
| C | 2.44024600 | 1.79296500 | 0.43194500  |
| C | 2.05884400 | 3.06840100 | 0.00972800  |
| C | 2.86319200 | 3.79295200 | -0.86443500 |
| C | 4.05686200 | 3.24641800 | -1.32973100 |
| H | 5.36768800 | 1.54026400 | -1.27993100 |
| H | 3.93005600 | 0.24757000 | 0.27114300  |

|   |              |              |              |
|---|--------------|--------------|--------------|
| H | 1. 12119700  | 3. 48330500  | 0. 37179100  |
| H | 2. 55899000  | 4. 78553500  | -1. 18183400 |
| H | 4. 68613000  | 3. 81186300  | -2. 00975300 |
| C | -0. 92615700 | 0. 81632400  | 0. 74720100  |
| O | -1. 12979900 | 1. 93692800  | 1. 15669700  |
| C | 0. 45789700  | 0. 22434600  | 0. 53045200  |
| H | 0. 64714000  | 0. 36455300  | -0. 54532200 |
| C | 1. 52779100  | 0. 99543500  | 1. 33228000  |
| H | 1. 02432700  | 1. 66654300  | 2. 03243300  |
| H | 2. 12104400  | 0. 28708300  | 1. 91677900  |
| C | -3. 31898300 | 0. 36946900  | 0. 17825000  |
| C | -4. 06364400 | -0. 60569500 | -0. 49608300 |
| C | -5. 40685500 | -0. 40988700 | -0. 78094300 |
| C | -6. 00740300 | 0. 78148400  | -0. 38055600 |
| C | -5. 26743600 | 1. 74889900  | 0. 29337700  |
| C | -3. 91739200 | 1. 55854900  | 0. 58448700  |
| H | -5. 97292300 | -1. 17268400 | -1. 30465100 |
| H | -7. 05683800 | 0. 95101100  | -0. 59539500 |
| H | -5. 74422800 | 2. 67219900  | 0. 60441200  |
| H | -3. 34130500 | 2. 30700700  | 1. 10806200  |
| N | -1. 97261800 | -0. 02675600 | 0. 35778500  |
| S | -3. 10671900 | -2. 02890200 | -0. 90166700 |
| C | -1. 68069800 | -1. 32978400 | -0. 11119600 |
| N | -0. 59605400 | -1. 96313900 | 0. 01390800  |
| C | 0. 46219300  | -1. 29859700 | 0. 77012500  |
| H | 0. 27960700  | -1. 48424900 | 1. 84112400  |
| C | 1. 81335800  | -1. 87746500 | 0. 40659100  |
| C | 2. 17858700  | -1. 98951600 | -0. 93593100 |
| C | 2. 73150600  | -2. 23487200 | 1. 39203400  |
| C | 3. 44935600  | -2. 43135600 | -1. 28536400 |
| H | 1. 45386700  | -1. 73749200 | -1. 70549700 |
| C | 4. 00651900  | -2. 67878400 | 1. 04547900  |
| H | 2. 44773100  | -2. 16576300 | 2. 43957000  |
| C | 4. 36935100  | -2. 77153600 | -0. 29456200 |
| H | 3. 72364000  | -2. 51218200 | -2. 33232400 |
| H | 4. 71243000  | -2. 95355200 | 1. 82277500  |
| H | 5. 36165800  | -3. 11550500 | -0. 56790400 |

**P(SS)**

|   |              |             |              |
|---|--------------|-------------|--------------|
| C | -4. 46607200 | 0. 81054700 | -1. 59593100 |
| C | -3. 09973000 | 0. 54442200 | -1. 58475100 |
| C | -2. 22735800 | 1. 33596500 | -0. 83983200 |
| C | -2. 74587800 | 2. 42214100 | -0. 12933600 |
| C | -4. 10948800 | 2. 69415400 | -0. 14166800 |

|   |             |             |             |
|---|-------------|-------------|-------------|
| C | -4.97624400 | 1.88281700  | -0.87080600 |
| H | -5.13195000 | 0.17003300  | -2.16595500 |
| H | -2.71012300 | -0.30756300 | -2.13450600 |
| H | -2.07199700 | 3.05902400  | 0.44065000  |
| H | -4.49608900 | 3.54120200  | 0.41672500  |
| H | -6.04179600 | 2.08896000  | -0.87582700 |
| C | 1.17152000  | 1.13069800  | 0.80904600  |
| O | 1.49270500  | 2.25053000  | 1.13398200  |
| C | -0.26903700 | 0.68165800  | 0.66396800  |
| H | -0.83122000 | 1.28821700  | 1.37855600  |
| C | -0.74639200 | 1.03283900  | -0.77129100 |
| H | -0.19057200 | 1.91441800  | -1.11116900 |
| H | -0.49509400 | 0.20698100  | -1.44656400 |
| C | 3.48602700  | 0.40422600  | 0.19938600  |
| C | 4.10340100  | -0.68006900 | -0.43633700 |
| C | 5.44826200  | -0.63911700 | -0.77273800 |
| C | 6.17863800  | 0.50635800  | -0.46407900 |
| C | 5.56482000  | 1.58235000  | 0.17138400  |
| C | 4.21389400  | 1.54775000  | 0.51416300  |
| H | 5.91746700  | -1.48395500 | -1.26521300 |
| H | 7.23147500  | 0.55397800  | -0.72011900 |
| H | 6.14306400  | 2.46785500  | 0.41175500  |
| H | 3.73182900  | 2.37843800  | 1.00807200  |
| N | 2.11435300  | 0.16146900  | 0.44256700  |
| S | 2.99107400  | -2.01691600 | -0.72424000 |
| C | 1.67511500  | -1.12934500 | 0.06683900  |
| N | 0.53363700  | -1.63054400 | 0.26274500  |
| C | -0.40774800 | -0.81095400 | 1.01927800  |
| H | -0.14006800 | -0.91699300 | 2.08408200  |
| C | -1.83099200 | -1.30598100 | 0.84225200  |
| C | -2.14393900 | -2.30972400 | -0.06998200 |
| C | -2.85836400 | -0.71128400 | 1.58087300  |
| C | -3.47062200 | -2.69617300 | -0.26003300 |
| H | -1.34140000 | -2.78070100 | -0.62638000 |
| C | -4.17994000 | -1.08656700 | 1.38273400  |
| H | -2.62608100 | 0.07087700  | 2.30050700  |
| C | -4.49076800 | -2.08125600 | 0.45605300  |
| H | -3.70347000 | -3.47924700 | -0.97535700 |
| H | -4.96950000 | -0.59945300 | 1.94594600  |
| H | -5.52386000 | -2.37486100 | 0.29844200  |

**TS6a(SS)**

|   |            |             |             |
|---|------------|-------------|-------------|
| C | 0.37026300 | -0.13956200 | -1.02296800 |
| C | 0.95648000 | 0.95946300  | -2.82056900 |

|   |              |              |              |
|---|--------------|--------------|--------------|
| C | 1. 93915800  | 1. 91029200  | -3. 42597600 |
| C | 2. 69019100  | 2. 42052000  | -2. 16352300 |
| C | 2. 54898200  | 1. 31046500  | -1. 09198000 |
| H | 2. 59910600  | 1. 37737300  | -4. 11732500 |
| H | 1. 44369200  | 2. 70998900  | -3. 97713900 |
| H | 2. 21190900  | 3. 33410200  | -1. 80430500 |
| H | 2. 40447500  | 1. 69918200  | -0. 08262900 |
| N | -0. 13053300 | 0. 33775600  | -3. 17146900 |
| N | -0. 48933600 | -0. 33947700 | -2. 03070300 |
| N | 1. 29848800  | 0. 67601800  | -1. 53375400 |
| H | 3. 74244900  | 2. 63716300  | -2. 35762200 |
| C | -1. 56265000 | -1. 29467200 | -2. 07304100 |
| C | -1. 19841100 | -2. 63877900 | -2. 23019000 |
| C | -2. 88114800 | -0. 86257200 | -1. 94793400 |
| C | -2. 21777400 | -3. 58231700 | -2. 20453300 |
| C | -3. 86658000 | -1. 85442600 | -1. 93603700 |
| C | -3. 55626300 | -3. 20663500 | -2. 04998800 |
| H | -1. 96134400 | -4. 63449300 | -2. 30483900 |
| H | -4. 90535300 | -1. 55095900 | -1. 83060200 |
| C | 3. 69136700  | 0. 28457300  | -1. 11109600 |
| H | 3. 93419000  | 0. 03580000  | -2. 15203100 |
| H | 3. 33043900  | -0. 61684900 | -0. 60915400 |
| C | 4. 90072000  | 0. 82579000  | -0. 39218700 |
| C | 6. 02677300  | 1. 27878600  | -1. 07849700 |
| C | 4. 87579200  | 0. 90388900  | 1. 00430000  |
| C | 7. 11585100  | 1. 80221100  | -0. 38436400 |
| H | 6. 05676400  | 1. 21005200  | -2. 16372600 |
| C | 5. 96109800  | 1. 42698700  | 1. 69745800  |
| H | 3. 99538200  | 0. 54270900  | 1. 53298800  |
| C | 7. 08358900  | 1. 87823600  | 1. 00413700  |
| H | 7. 98930500  | 2. 14648800  | -0. 92919700 |
| H | 5. 93429500  | 1. 48066600  | 2. 78115500  |
| H | 7. 93131500  | 2. 28487800  | 1. 54624800  |
| C | -4. 63893900 | -4. 25421700 | -2. 04022800 |
| H | -5. 58119800 | -3. 84877300 | -1. 66660500 |
| H | -4. 81464200 | -4. 63839600 | -3. 05008100 |
| H | -4. 35709500 | -5. 10340900 | -1. 41187100 |
| C | 0. 24458400  | -3. 03322800 | -2. 39359200 |
| H | 0. 32384500  | -4. 08000200 | -2. 68915300 |
| H | 0. 73498800  | -2. 41552300 | -3. 15298200 |
| H | 0. 79619400  | -2. 92263300 | -1. 45163200 |
| C | -3. 25273500 | 0. 58722900  | -1. 79813500 |
| H | -4. 15925700 | 0. 80175800  | -2. 36896900 |
| H | -3. 44849200 | 0. 83216000  | -0. 74883300 |



|   |             |             |             |
|---|-------------|-------------|-------------|
| H | -2.46261400 | 1.25623300  | -2.14714800 |
| C | 0.15189700  | -5.65581600 | -0.15270200 |
| C | -0.37851100 | -4.62313900 | 0.61545400  |
| C | 0.44927200  | -3.64104500 | 1.16805500  |
| C | 1.82402100  | -3.71036500 | 0.92339800  |
| C | 2.35759400  | -4.74129700 | 0.15272300  |
| C | 1.52421100  | -5.71844700 | -0.38606400 |
| H | -0.50589500 | -6.41676700 | -0.56346700 |
| H | -1.45073800 | -4.57610100 | 0.79509500  |
| H | 2.46613800  | -2.93660000 | 1.33418800  |
| H | 3.42816300  | -4.78369300 | -0.02332400 |
| H | 1.94116000  | -6.52527400 | -0.98077100 |
| C | 0.42560300  | -0.53934100 | 0.45177800  |
| O | 1.57651200  | -0.52282700 | 0.91765500  |
| C | -0.69661000 | -1.40274300 | 1.08665900  |
| H | -1.33578500 | -1.84595500 | 0.31748900  |
| C | -0.13851900 | -2.51091100 | 1.97715100  |
| H | 0.61919400  | -2.08654000 | 2.64004400  |
| H | -0.95362500 | -2.88275100 | 2.60879000  |
| C | -2.90947100 | 3.45246200  | 0.35892200  |
| C | -1.91138300 | 4.06969400  | -0.42799000 |
| C | -2.13605900 | 5.26663100  | -1.09592600 |
| C | -3.38745400 | 5.86611700  | -0.97980500 |
| C | -4.38797500 | 5.26834900  | -0.20755300 |
| C | -4.16024000 | 4.07145400  | 0.45902200  |
| H | -1.35455400 | 5.72682700  | -1.69216800 |
| H | -3.58252100 | 6.80290200  | -1.49084200 |
| H | -5.35841700 | 5.74781900  | -0.12544700 |
| H | -4.92905500 | 3.60136500  | 1.06278000  |
| N | -2.57148300 | 2.25814400  | 0.95989200  |
| S | -0.45978100 | 3.08756400  | -0.37768800 |
| C | -1.34026000 | 1.91343900  | 0.67837900  |
| N | -0.69973600 | 0.82014500  | 1.07558700  |
| C | -1.45024100 | -0.22701600 | 1.76534900  |
| H | -2.51323900 | -0.21985200 | 1.49189400  |
| C | -1.33607200 | -0.15064300 | 3.27162600  |
| C | -0.13246500 | 0.23250600  | 3.86974000  |
| C | -2.41663900 | -0.49771900 | 4.08090000  |
| C | -0.01612900 | 0.26091600  | 5.25499600  |
| H | 0.70376100  | 0.50269500  | 3.22994400  |
| C | -2.30173400 | -0.46842400 | 5.46904100  |
| H | -3.35925800 | -0.78094200 | 3.61867900  |
| C | -1.10010200 | -0.08953700 | 6.05875900  |
| H | 0.92235300  | 0.56061100  | 5.71165300  |

|   |             |             |            |
|---|-------------|-------------|------------|
| H | -3.15338900 | -0.73354300 | 6.08792700 |
| H | -1.00854800 | -0.06117400 | 7.14006800 |

**6a(SS)**

|   |             |             |             |
|---|-------------|-------------|-------------|
| C | -0.70461200 | -0.60395200 | -1.18081200 |
| C | 0.30585100  | -0.34808400 | -3.08580700 |
| C | 1.58841700  | -0.45124000 | -3.84109200 |
| C | 2.43465900  | -1.37738100 | -2.92984000 |
| C | 1.75011000  | -1.43332700 | -1.53728800 |
| H | 1.44590400  | -0.85378200 | -4.84510000 |
| H | 2.02352400  | 0.54754700  | -3.92652900 |
| H | 3.46094800  | -1.02417200 | -2.82950300 |
| H | 2.17196400  | -0.68707400 | -0.85462800 |
| N | -0.83418900 | 0.25624600  | -3.24921800 |
| N | -1.46672600 | 0.05706700  | -2.04963100 |
| N | 0.39555200  | -0.95044900 | -1.86208100 |
| H | 2.46885000  | -2.38856400 | -3.34647400 |
| C | -2.79865000 | 0.53882200  | -1.81539800 |
| C | -3.83897800 | -0.38941300 | -1.76852600 |
| C | -2.96728300 | 1.91075500  | -1.60034900 |
| C | -5.11006100 | 0.10021500  | -1.47270400 |
| C | -4.25589500 | 2.34263300  | -1.29983000 |
| C | -5.33151600 | 1.45314500  | -1.22515600 |
| H | -5.93928900 | -0.59847300 | -1.41111000 |
| H | -4.42220300 | 3.39992900  | -1.10738900 |
| C | 1.77752800  | -2.82997800 | -0.91672200 |
| H | 1.27878700  | -3.52826800 | -1.59841300 |
| H | 1.21147600  | -2.83975800 | 0.01876300  |
| C | 3.20773900  | -3.26326200 | -0.68226900 |
| C | 3.72583500  | -4.39049700 | -1.32044300 |
| C | 4.04341700  | -2.52690400 | 0.16553600  |
| C | 5.04600900  | -4.78391800 | -1.11362000 |
| H | 3.08570300  | -4.97148600 | -1.97981400 |
| C | 5.36268000  | -2.91657900 | 0.37117600  |
| H | 3.66593400  | -1.64191400 | 0.67359000  |
| C | 5.86797700  | -4.04709900 | -0.26731500 |
| H | 5.43056000  | -5.66657500 | -1.61483200 |
| H | 5.99631400  | -2.33283200 | 1.03103300  |
| H | 6.89729700  | -4.35017900 | -0.10548700 |
| C | -6.70958800 | 1.95633800  | -0.88585200 |
| H | -6.68320800 | 2.58827000  | 0.00673500  |
| H | -7.11811000 | 2.55839600  | -1.70354600 |
| H | -7.39488900 | 1.12716300  | -0.69635300 |
| C | -3.60458800 | -1.85525300 | -2.03001200 |

|   |             |             |             |
|---|-------------|-------------|-------------|
| H | -4.55890000 | -2.37917700 | -2.10484000 |
| H | -3.05319700 | -2.00367500 | -2.96382300 |
| H | -3.03413200 | -2.32606900 | -1.22258200 |
| C | -1.79103100 | 2.84756300  | -1.65412200 |
| H | -2.07752700 | 3.84193700  | -1.30844100 |
| H | -0.96738700 | 2.47551000  | -1.03114100 |
| H | -1.40895600 | 2.93187100  | -2.67589600 |
| C | -6.05443300 | -0.11583400 | 1.80864200  |
| C | -4.73158500 | 0.17615600  | 2.12653800  |
| C | -3.73072600 | -0.79171500 | 2.00046400  |
| C | -4.08369600 | -2.05814800 | 1.52446800  |
| C | -5.40429100 | -2.34892600 | 1.18853300  |
| C | -6.39543900 | -1.38128800 | 1.33728400  |
| H | -6.82124600 | 0.64209200  | 1.93878000  |
| H | -4.46972200 | 1.16452400  | 2.49746300  |
| H | -3.31455600 | -2.82052500 | 1.43295400  |
| H | -5.66224800 | -3.34103000 | 0.82963200  |
| H | -7.42819100 | -1.61474100 | 1.09560500  |
| C | -1.10228100 | -1.01039400 | 0.22742000  |
| O | -1.03306100 | -2.18872600 | 0.49765500  |
| C | -1.50282600 | 0.08779600  | 1.18598500  |
| H | -2.11260300 | 0.81043600  | 0.63166100  |
| C | -2.30272100 | -0.46214300 | 2.36847800  |
| H | -1.79294400 | -1.34323500 | 2.76921400  |
| H | -2.29466200 | 0.29667700  | 3.15845700  |
| C | 3.08567200  | 3.31593300  | 0.83485900  |
| C | 3.44441100  | 3.20192100  | -0.53142200 |
| C | 4.50524900  | 3.91156300  | -1.07582100 |
| C | 5.23654300  | 4.76100300  | -0.24766600 |
| C | 4.89902400  | 4.88649000  | 1.10208400  |
| C | 3.83600100  | 4.17546600  | 1.64557400  |
| H | 4.75984400  | 3.80873100  | -2.12611300 |
| H | 6.06902500  | 5.32427500  | -0.65628600 |
| H | 5.47766900  | 5.54937800  | 1.73831600  |
| H | 3.57010100  | 4.26508100  | 2.69338500  |
| N | 2.02133300  | 2.55645300  | 1.26653100  |
| S | 2.34878500  | 2.07473500  | -1.31043500 |
| C | 1.51429100  | 1.83811100  | 0.29336900  |
| N | 0.50047400  | 0.99452300  | 0.29245500  |
| C | -0.18372000 | 0.84745100  | 1.55688000  |
| H | -0.47622800 | 1.82066200  | 1.98530600  |
| C | 0.59916500  | 0.10581600  | 2.63017300  |
| C | 1.44301100  | -0.95134900 | 2.29173300  |
| C | 0.46496900  | 0.44340700  | 3.97681800  |

|   |              |              |             |
|---|--------------|--------------|-------------|
| C | 2. 12570300  | -1. 66982100 | 3. 26728600 |
| H | 1. 57621200  | -1. 18501300 | 1. 24146000 |
| C | 1. 14310500  | -0. 27118700 | 4. 96098900 |
| H | -0. 16052600 | 1. 28864600  | 4. 25384800 |
| C | 1. 97191700  | -1. 33348200 | 4. 61012200 |
| H | 2. 78062100  | -2. 48676200 | 2. 97609000 |
| H | 1. 03304100  | 0. 00995300  | 6. 00384400 |
| H | 2. 50363000  | -1. 88708700 | 5. 37741300 |

**TS7a(SS)**

|   |              |              |              |
|---|--------------|--------------|--------------|
| C | -0. 32991200 | 0. 67235500  | 1. 15747000  |
| C | -1. 32502900 | 1. 91604000  | 2. 70498300  |
| C | -2. 51609000 | 2. 76247800  | 3. 02718800  |
| C | -3. 08431200 | 3. 03855000  | 1. 60787200  |
| C | -2. 62012800 | 1. 85840800  | 0. 71941300  |
| H | -3. 21692300 | 2. 19378500  | 3. 64645400  |
| H | -2. 25132000 | 3. 67187900  | 3. 56744900  |
| H | -2. 66239400 | 3. 97188400  | 1. 22666600  |
| H | -2. 36469500 | 2. 16023800  | -0. 29536000 |
| N | -0. 26517700 | 1. 47014100  | 3. 31231400  |
| N | 0. 32930200  | 0. 70721900  | 2. 33005200  |
| N | -1. 39082100 | 1. 46000600  | 1. 41852200  |
| H | -4. 17261500 | 3. 12887700  | 1. 59693100  |
| C | 1. 53638700  | -0. 02369900 | 2. 57131500  |
| C | 1. 43116600  | -1. 32333300 | 3. 07346000  |
| C | 2. 75523200  | 0. 55652700  | 2. 21053500  |
| C | 2. 59666800  | -2. 08761200 | 3. 12572100  |
| C | 3. 89009100  | -0. 25061800 | 2. 27041700  |
| C | 3. 82525100  | -1. 57654100 | 2. 70175900  |
| H | 2. 54151500  | -3. 10804500 | 3. 49793300  |
| H | 4. 84408800  | 0. 16518700  | 1. 95612100  |
| C | -3. 61162900 | 0. 68830700  | 0. 68330400  |
| H | -4. 01368200 | 0. 51548000  | 1. 69010700  |
| H | -3. 06621500 | -0. 20982800 | 0. 37452300  |
| C | -4. 72696700 | 0. 94788100  | -0. 29682800 |
| C | -6. 05376200 | 1. 07172300  | 0. 11032900  |
| C | -4. 42233100 | 1. 04001200  | -1. 66086300 |
| C | -7. 06830400 | 1. 27633800  | -0. 82468800 |
| H | -6. 29809500 | 0. 99034800  | 1. 16711900  |
| C | -5. 43231500 | 1. 24808800  | -2. 59273700 |
| H | -3. 38790500 | 0. 91304700  | -1. 97520000 |
| C | -6. 75933000 | 1. 36492800  | -2. 17786200 |
| H | -8. 09851900 | 1. 36387800  | -0. 49361000 |
| H | -5. 18701600 | 1. 31106800  | -3. 64855000 |

|   |             |             |             |
|---|-------------|-------------|-------------|
| H | -7.54694700 | 1.52208600  | -2.90794300 |
| C | 5.05638300  | -2.44540900 | 2.68471200  |
| H | 5.94761500  | -1.87367300 | 2.95394700  |
| H | 4.96172700  | -3.28311400 | 3.37929700  |
| H | 5.21887100  | -2.85558700 | 1.68236800  |
| C | 0.11522500  | -1.86353700 | 3.57168800  |
| H | 0.14307400  | -2.95371100 | 3.63252400  |
| H | -0.09858400 | -1.47061600 | 4.57084900  |
| H | -0.72143800 | -1.57272200 | 2.92922500  |
| C | 2.83852900  | 2.00724100  | 1.82196800  |
| H | 2.70704300  | 2.63514000  | 2.70972800  |
| H | 3.80620400  | 2.23483000  | 1.37238400  |
| H | 2.05702200  | 2.28618100  | 1.10958000  |
| C | -3.95652400 | -3.24552500 | 1.07769000  |
| C | -2.63472900 | -3.26403000 | 0.64368200  |
| C | -2.28290600 | -2.75917600 | -0.61261400 |
| C | -3.28982700 | -2.23868000 | -1.42688600 |
| C | -4.61665200 | -2.22813900 | -1.00154600 |
| C | -4.95316300 | -2.72583000 | 0.25396100  |
| H | -4.20965300 | -3.64059600 | 2.05706300  |
| H | -1.86069300 | -3.67654500 | 1.28863600  |
| H | -3.02346200 | -1.81184500 | -2.38968800 |
| H | -5.38284300 | -1.79837300 | -1.64043700 |
| H | -5.98526100 | -2.70405900 | 0.58955100  |
| C | -0.30884900 | -0.26255500 | -0.60244700 |
| O | -1.24931600 | 0.25274500  | -1.21357100 |
| C | -0.05578600 | -1.74049500 | -0.17644100 |
| H | -0.22514500 | -1.94618200 | 0.88076300  |
| C | -0.83141400 | -2.73333100 | -1.03618900 |
| H | -0.74833300 | -2.45608000 | -2.09181200 |
| H | -0.38215600 | -3.72827900 | -0.92849200 |
| C | 3.61243800  | 2.19669500  | -1.42072000 |
| C | 2.62585400  | 3.18278300  | -1.63155200 |
| C | 2.96173300  | 4.51745600  | -1.83647600 |
| C | 4.30718600  | 4.86810000  | -1.82869200 |
| C | 5.29633200  | 3.89932600  | -1.62035300 |
| C | 4.96033000  | 2.56816900  | -1.41727700 |
| H | 2.19363900  | 5.26679300  | -1.99740300 |
| H | 4.59011700  | 5.90330800  | -1.98752500 |
| H | 6.34080400  | 4.19411400  | -1.61922700 |
| H | 5.71495900  | 1.80573800  | -1.25579700 |
| N | 3.14612300  | 0.91192800  | -1.19187800 |
| S | 1.03683100  | 2.44365900  | -1.58183400 |
| C | 1.85240300  | 0.90015400  | -1.23694000 |

|   |             |              |              |
|---|-------------|--------------|--------------|
| N | 1. 07739200 | -0. 18712400 | -1. 03597000 |
| C | 1. 45668300 | -1. 49393800 | -0. 50231900 |
| H | 2. 06423600 | -1. 40542200 | 0. 40544400  |
| C | 2. 13401300 | -2. 43460900 | -1. 46047900 |
| C | 2. 07890500 | -2. 25096000 | -2. 84122300 |
| C | 2. 80268300 | -3. 54605300 | -0. 94403100 |
| C | 2. 68503500 | -3. 16996100 | -3. 69358700 |
| H | 1. 56826100 | -1. 37822400 | -3. 23830800 |
| C | 3. 40117400 | -4. 46902800 | -1. 79537600 |
| H | 2. 85399600 | -3. 67788100 | 0. 13550500  |
| C | 3. 34374200 | -4. 28126100 | -3. 17456800 |
| H | 2. 64471100 | -3. 01558300 | -4. 76729600 |
| H | 3. 91777600 | -5. 33059900 | -1. 38369200 |
| H | 3. 81483600 | -4. 99599800 | -3. 84182000 |

**Pa(SS)**

|   |              |              |              |
|---|--------------|--------------|--------------|
| C | -6. 45867500 | -0. 59414900 | -0. 12662300 |
| C | -5. 28220400 | 0. 15059500  | -0. 12227500 |
| C | -4. 04466900 | -0. 46720300 | 0. 06659900  |
| C | -4. 00392400 | -1. 85334700 | 0. 24782000  |
| C | -5. 17952600 | -2. 59832900 | 0. 23963400  |
| C | -6. 40981600 | -1. 97291200 | 0. 05372000  |
| H | -7. 41203500 | -0. 09668800 | -0. 27492500 |
| H | -5. 32436400 | 1. 22716000  | -0. 26722100 |
| H | -3. 04907000 | -2. 35104600 | 0. 39624800  |
| H | -5. 13260000 | -3. 67370500 | 0. 38024000  |
| H | -7. 32436600 | -2. 55723500 | 0. 04794600  |
| C | -0. 70569700 | -1. 22324400 | -0. 20555800 |
| O | -0. 75773600 | -2. 31544300 | 0. 29891200  |
| C | -1. 67271400 | -0. 19739200 | -0. 81470000 |
| H | -2. 08760900 | -0. 56096800 | -1. 75977200 |
| C | -2. 77955900 | 0. 36297000  | 0. 07819500  |
| H | -2. 39996200 | 0. 46876500  | 1. 10190100  |
| H | -3. 00784300 | 1. 37891500  | -0. 26337900 |
| C | 3. 87749900  | -0. 14055400 | -0. 39009300 |
| C | 3. 95585400  | -1. 41174700 | 0. 21112500  |
| C | 5. 18019900  | -1. 98784500 | 0. 54146400  |
| C | 6. 33566400  | -1. 26991700 | 0. 26308500  |
| C | 6. 27052300  | -0. 00322200 | -0. 33369200 |
| C | 5. 05146600  | 0. 56785700  | -0. 66293900 |
| H | 5. 23107200  | -2. 96841800 | 1. 00258200  |
| H | 7. 30113100  | -1. 69792400 | 0. 51137100  |
| H | 7. 18853900  | 0. 53650300  | -0. 54094100 |
| H | 4. 98124100  | 1. 54669300  | -1. 12429400 |

|   |             |             |             |
|---|-------------|-------------|-------------|
| N | 2.59435600  | 0.31099700  | -0.66653900 |
| S | 2.34605700  | -2.06158300 | 0.43637800  |
| C | 1.73685800  | -0.57485800 | -0.29337600 |
| N | 0.38214900  | -0.40362400 | -0.44320600 |
| C | -0.38789500 | 0.69126000  | -1.04184600 |
| H | -0.14213500 | 0.82422700  | -2.10006200 |
| C | -0.32603500 | 2.00926000  | -0.31952400 |
| C | 0.03407600  | 2.09454500  | 1.02578200  |
| C | -0.69780800 | 3.16815700  | -1.00171200 |
| C | 0.01771600  | 3.32327700  | 1.67798400  |
| H | 0.33787800  | 1.19886900  | 1.56071900  |
| C | -0.72036100 | 4.39609900  | -0.34805900 |
| H | -0.96743600 | 3.10760400  | -2.05339100 |
| C | -0.36217800 | 4.47574300  | 0.99485700  |
| H | 0.30658600  | 3.38046800  | 2.72249300  |
| H | -1.00967500 | 5.29084000  | -0.88973400 |
| H | -0.37269000 | 5.43293200  | 1.50588500  |

**TS5(SS)\_NHC1**

|   |             |             |             |
|---|-------------|-------------|-------------|
| C | -0.05193700 | -0.51754700 | -1.21907200 |
| C | -1.61134400 | -1.52117000 | -2.38253700 |
| C | -3.07998000 | -1.72688500 | -2.56970900 |
| C | -3.65272500 | -1.08822900 | -1.27300800 |
| C | -2.59076400 | -0.08848100 | -0.75083100 |
| H | -3.41863100 | -1.21821800 | -3.47733900 |
| H | -3.32638200 | -2.78641400 | -2.65489100 |
| H | -3.80585500 | -1.86972000 | -0.52528300 |
| H | -2.46115400 | -0.14028200 | 0.33044500  |
| N | -0.50315700 | -1.97678200 | -2.88910300 |
| N | 0.46543500  | -1.32922300 | -2.15592800 |
| N | -1.37636100 | -0.63185100 | -1.38090900 |
| H | -4.60588800 | -0.58280100 | -1.44240900 |
| C | 1.83740300  | -1.70971700 | -2.31915000 |
| C | 2.57199200  | -1.18446600 | -3.37466300 |
| C | 2.38310400  | -2.60912800 | -1.40967100 |
| C | 3.90522500  | -1.55880300 | -3.50948400 |
| C | 3.71898800  | -2.97284100 | -1.55577300 |
| C | 4.47748100  | -2.44618400 | -2.59931500 |
| H | 4.49801100  | -1.15435300 | -4.32273300 |
| H | 4.16488500  | -3.66796300 | -0.85201600 |
| C | -2.81693500 | 1.36693100  | -1.17999700 |
| H | -3.13609000 | 1.39451500  | -2.22951200 |
| H | -1.86467500 | 1.89866200  | -1.09149800 |
| C | -3.84340100 | 2.01660700  | -0.28625500 |

|   |             |             |             |
|---|-------------|-------------|-------------|
| C | -5.12864400 | 2.31948100  | -0.73244900 |
| C | -3.49940700 | 2.29049100  | 1.04271800  |
| C | -6.06126800 | 2.89235700  | 0.13089400  |
| H | -5.39895000 | 2.11388400  | -1.76585000 |
| C | -4.42948000 | 2.86050400  | 1.90395000  |
| H | -2.49480800 | 2.04826300  | 1.38606200  |
| C | -5.71282300 | 3.16288400  | 1.45005500  |
| H | -7.05800000 | 3.12767500  | -0.22901200 |
| H | -4.15331800 | 3.07205800  | 2.93216800  |
| H | -6.43737800 | 3.60875900  | 2.12398600  |
| C | 2.15419300  | 4.55514500  | -2.39087900 |
| C | 2.59206900  | 3.55559400  | -1.52730700 |
| C | 1.81753700  | 3.16227100  | -0.43247900 |
| C | 0.58961300  | 3.79692700  | -0.21987400 |
| C | 0.14683600  | 4.79462600  | -1.08506600 |
| C | 0.92669700  | 5.17701000  | -2.17357500 |
| H | 2.77288800  | 4.85270800  | -3.23232800 |
| H | 3.55192300  | 3.07274000  | -1.69809800 |
| H | -0.01894800 | 3.48990700  | 0.62492200  |
| H | -0.80951100 | 5.27673600  | -0.90435900 |
| H | 0.58352100  | 5.95790200  | -2.84501100 |
| C | 0.52476100  | 0.45529300  | -0.22794800 |
| O | -0.32968400 | 0.97240300  | 0.51963400  |
| C | 1.90351100  | 0.69243300  | -0.13335700 |
| H | 2.56982100  | 0.27597000  | -0.88403800 |
| C | 2.27382000  | 2.03378900  | 0.46780700  |
| H | 1.79331400  | 2.12132500  | 1.44819800  |
| H | 3.35614300  | 2.08612600  | 0.61914300  |
| C | -1.22025100 | -2.82438600 | 0.94017200  |
| C | -2.12791500 | -2.46975100 | 1.96618400  |
| C | -3.39432300 | -3.04369900 | 2.04157400  |
| C | -3.75957800 | -3.98694400 | 1.08477500  |
| C | -2.87177000 | -4.34508000 | 0.06233200  |
| C | -1.61018100 | -3.76771200 | -0.01970000 |
| H | -4.08020200 | -2.76633900 | 2.83538200  |
| H | -4.73985900 | -4.44902200 | 1.13703200  |
| H | -3.16992000 | -5.08858300 | -0.67076400 |
| H | -0.91325300 | -4.04111300 | -0.80736300 |
| N | 0.00677500  | -2.19534200 | 0.97958600  |
| S | -1.37918300 | -1.29310000 | 3.01419200  |
| C | 0.08528800  | -1.36785800 | 2.00128100  |
| N | 1.12152200  | -0.59207500 | 2.36496500  |
| C | 2.19891700  | -0.68100400 | 1.59318400  |
| H | 2.31048800  | -1.51930500 | 0.90413100  |



|   |            |             |             |
|---|------------|-------------|-------------|
| C | 3.46800700 | -0.09898000 | 2.07949400  |
| C | 3.50027200 | 0.68690800  | 3.23440100  |
| C | 4.65105700 | -0.32829200 | 1.37031200  |
| C | 4.69990100 | 1.24214100  | 3.66587400  |
| H | 2.57251500 | 0.84290200  | 3.77503000  |
| C | 5.84914700 | 0.22780600  | 1.80269000  |
| H | 4.61874800 | -0.93504800 | 0.46689000  |
| C | 5.87507700 | 1.01725100  | 2.95197700  |
| H | 4.71937200 | 1.85322600  | 4.56278800  |
| H | 6.76392300 | 0.04678200  | 1.24692800  |
| H | 6.80987700 | 1.45277400  | 3.29075000  |
| H | 5.51894300 | -2.73104100 | -2.70720900 |
| H | 1.75966800 | -2.98244000 | -0.60069900 |
| H | 2.10465500 | -0.48873600 | -4.06331500 |

**TS5(SS)\_NHC2**

|   |             |             |             |
|---|-------------|-------------|-------------|
| C | -1.06722300 | 0.70339300  | -1.19437900 |
| C | -0.19489000 | 2.07589600  | -2.66295400 |
| C | 1.06885000  | 2.64861000  | -3.22025600 |
| C | 2.10559700  | 1.59729000  | -2.73659000 |
| C | 1.52730400  | 1.00178400  | -1.43120800 |
| H | 1.03464600  | 2.76727500  | -4.30293600 |
| H | 1.24761800  | 3.62800000  | -2.76244200 |
| H | 3.09085900  | 2.02822500  | -2.54887500 |
| N | -1.47038500 | 2.11712900  | -2.91438600 |
| N | -2.00430900 | 1.24452600  | -1.99205200 |
| N | 0.08681600  | 1.23106400  | -1.63324600 |
| H | 2.21769800  | 0.80602400  | -3.48374500 |
| C | -3.40149200 | 0.91912200  | -2.06993600 |
| C | -3.75786400 | -0.28577200 | -2.68660600 |
| C | -4.33857600 | 1.83696200  | -1.58882500 |
| C | -5.11346400 | -0.60291400 | -2.73399500 |
| C | -5.68331200 | 1.47357500  | -1.66915600 |
| C | -6.08591000 | 0.25578600  | -2.21799300 |
| H | -5.41752900 | -1.53978900 | -3.19436900 |
| H | -6.43322000 | 2.16511000  | -1.29328700 |
| C | -7.54129900 | -0.13220300 | -2.24152300 |
| H | -7.79919000 | -0.70815700 | -1.34644300 |
| H | -8.18619300 | 0.74889800  | -2.26430900 |
| H | -7.77252600 | -0.75246000 | -3.11055600 |
| C | -2.71664800 | -1.21029300 | -3.26011800 |
| H | -1.98626700 | -0.65528600 | -3.85670400 |
| H | -2.17376900 | -1.73808000 | -2.46677800 |
| H | -3.18555600 | -1.95813400 | -3.90188500 |

|   |             |             |             |
|---|-------------|-------------|-------------|
| C | -3.91474800 | 3.17308200  | -1.04427700 |
| H | -4.77044400 | 3.70227000  | -0.62129600 |
| H | -3.14522300 | 3.06057400  | -0.27338800 |
| H | -3.49260600 | 3.78579300  | -1.84820900 |
| C | -1.14062200 | -5.08030500 | -1.40551500 |
| C | -1.84610100 | -4.14936100 | -0.64894200 |
| C | -1.19296300 | -3.33336100 | 0.28023900  |
| C | 0.18921700  | -3.46836300 | 0.43788200  |
| C | 0.89526300  | -4.40982400 | -0.30964200 |
| C | 0.23624700  | -5.21503900 | -1.23595900 |
| H | -1.66586100 | -5.70904200 | -2.11849700 |
| H | -2.92316400 | -4.05163600 | -0.77361100 |
| H | 0.70660400  | -2.82244200 | 1.14251500  |
| H | 1.96865900  | -4.50882500 | -0.16408600 |
| H | 0.78924400  | -5.94988700 | -1.81359400 |
| C | -1.06395000 | -0.32611900 | -0.09477000 |
| O | 0.03103300  | -0.41210100 | 0.50689600  |
| C | -2.20488200 | -1.06461200 | 0.21557500  |
| H | -3.08674800 | -1.02201000 | -0.41158800 |
| C | -1.97028100 | -2.29317800 | 1.06002100  |
| H | -1.40387700 | -2.00055400 | 1.95278900  |
| H | -2.92898800 | -2.71035400 | 1.38364000  |
| C | -0.39487600 | 3.49269000  | 0.91660100  |
| C | 0.51502100  | 3.58851900  | 1.99444200  |
| C | 1.54455200  | 4.52463800  | 1.99073200  |
| C | 1.65991500  | 5.38216200  | 0.90094300  |
| C | 0.75475100  | 5.30905200  | -0.16563700 |
| C | -0.27175900 | 4.37262900  | -0.16635800 |
| H | 2.24790600  | 4.57988300  | 2.81504600  |
| H | 2.45861900  | 6.11598500  | 0.88084900  |
| H | 0.85332900  | 5.99835000  | -0.99887900 |
| H | -0.98277500 | 4.30653200  | -0.98618900 |
| N | -1.33242400 | 2.48812500  | 1.01246100  |
| S | 0.14147700  | 2.35354800  | 3.16803900  |
| C | -1.18280500 | 1.80056000  | 2.11715800  |
| N | -1.92567800 | 0.76192100  | 2.56322800  |
| C | -2.95956200 | 0.43902100  | 1.81399500  |
| H | -3.28648100 | 1.09278600  | 1.00039800  |
| C | -3.97858500 | -0.48484300 | 2.34607600  |
| C | -3.79020500 | -1.11811200 | 3.57783200  |
| C | -5.14345400 | -0.73399200 | 1.61279700  |
| C | -4.75234500 | -1.99597200 | 4.06386800  |
| H | -2.88379900 | -0.90132100 | 4.13323700  |
| C | -6.10284000 | -1.61327100 | 2.10078900  |

|    |             |             |             |
|----|-------------|-------------|-------------|
| H  | -5.28363400 | -0.24071400 | 0.65145400  |
| C  | -5.90766600 | -2.24850200 | 3.32700100  |
| H  | -4.60215000 | -2.48542600 | 5.02098500  |
| H  | -7.00468200 | -1.80635400 | 1.52794600  |
| H  | -6.65609800 | -2.93633300 | 3.70766500  |
| H  | 1.67304300  | -0.07287400 | -1.35091000 |
| C  | 2.06139200  | 1.67945400  | -0.17167400 |
| H  | 1.98097200  | 2.76851800  | -0.26826900 |
| H  | 1.45892900  | 1.34231400  | 0.67531900  |
| O  | 3.42878700  | 1.37184300  | -0.00327200 |
| Si | 4.17260000  | -0.11821200 | 0.16931500  |
| C  | 3.33269600  | -1.16653500 | 1.47815100  |
| C  | 3.60222900  | -2.54235900 | 1.57261900  |
| C  | 2.47522500  | -0.60021600 | 2.42979600  |
| C  | 3.04037300  | -3.31997200 | 2.58112800  |
| H  | 4.25493500  | -3.01605500 | 0.84046100  |
| C  | 1.88732300  | -1.37704200 | 3.42507600  |
| H  | 2.24921500  | 0.46194000  | 2.39667900  |
| C  | 2.17415100  | -2.73689300 | 3.50518300  |
| H  | 3.26210800  | -4.38150300 | 2.63653200  |
| H  | 1.19862200  | -0.91799800 | 4.12794600  |
| H  | 1.71736100  | -3.34540400 | 4.27968000  |
| C  | 4.11005500  | -1.10066800 | -1.44754100 |
| C  | 3.08801600  | -2.04574800 | -1.64362800 |
| C  | 5.01092500  | -0.89705500 | -2.50278800 |
| C  | 2.96853400  | -2.75518300 | -2.83514900 |
| H  | 2.35672400  | -2.22083400 | -0.85598200 |
| C  | 4.90060300  | -1.60400900 | -3.69888600 |
| H  | 5.81670600  | -0.17631800 | -2.39755300 |
| C  | 3.87927600  | -2.53523200 | -3.86686900 |
| H  | 2.16501700  | -3.47829300 | -2.94652200 |
| H  | 5.61471500  | -1.42959400 | -4.49796200 |
| H  | 3.79503100  | -3.08795700 | -4.79772500 |
| C  | 5.92302400  | 0.35323300  | 0.72538000  |
| C  | 6.50436200  | 1.48983400  | -0.12775900 |
| C  | 5.81898700  | 0.85448900  | 2.17616900  |
| C  | 6.84604300  | -0.87119100 | 0.67940100  |
| H  | 6.67813000  | 1.19215200  | -1.16628800 |
| H  | 5.84146500  | 2.35970900  | -0.13050500 |
| H  | 7.47430300  | 1.80011500  | 0.28337400  |
| H  | 5.44800000  | 0.07547100  | 2.84932600  |
| H  | 6.80876000  | 1.16856000  | 2.53248300  |
| H  | 5.14646500  | 1.71647900  | 2.25020000  |
| H  | 7.84387400  | -0.60502400 | 1.05182400  |

|   |            |             |             |
|---|------------|-------------|-------------|
| H | 6.46529000 | -1.68203900 | 1.31125400  |
| H | 6.95954100 | -1.26119500 | -0.33783800 |

**TS5(SS)\_NHC3**

|   |             |             |             |
|---|-------------|-------------|-------------|
| C | -2.17814200 | 4.46586000  | -2.60059000 |
| C | -2.49286900 | 3.12887400  | -2.37578700 |
| C | -1.58596800 | 2.11237000  | -2.69202100 |
| C | -0.35308800 | 2.46567300  | -3.24999400 |
| C | -0.03564700 | 3.80403500  | -3.47445300 |
| C | -0.94384700 | 4.80826600  | -3.14855300 |
| H | -2.89908800 | 5.24069400  | -2.35692000 |
| H | -3.45876500 | 2.86116400  | -1.95110700 |
| H | 0.35661200  | 1.68021400  | -3.49034000 |
| H | 0.92269800  | 4.06199500  | -3.91638000 |
| H | -0.69769200 | 5.84966000  | -3.33144600 |
| C | -0.22422500 | 0.52289400  | -0.57063000 |
| O | 0.72466300  | 0.34430900  | -1.35380800 |
| C | -1.58506700 | 0.41559900  | -0.89867200 |
| H | -2.32904000 | 0.70553600  | -0.16527000 |
| C | -1.90817300 | 0.67267100  | -2.35540000 |
| H | -1.31541700 | -0.01339600 | -2.97048000 |
| H | -2.96746600 | 0.47037600  | -2.53789100 |
| C | 1.93868000  | -3.25802500 | 0.27214500  |
| C | 2.51191400  | -3.76530600 | -0.91728400 |
| C | 3.72093400  | -4.45608600 | -0.90592500 |
| C | 4.37442300  | -4.63428700 | 0.30931000  |
| C | 3.82812100  | -4.11957400 | 1.49197500  |
| C | 2.62145800  | -3.43358900 | 1.48208100  |
| H | 4.14184200  | -4.84811200 | -1.82608200 |
| H | 5.31494300  | -5.17438200 | 0.33840400  |
| H | 4.35433600  | -4.26117200 | 2.43051300  |
| H | 2.19162000  | -3.03728000 | 2.39676600  |
| N | 0.71966500  | -2.62415700 | 0.12978900  |
| S | 1.46250400  | -3.39884000 | -2.25770500 |
| C | 0.32560200  | -2.63895700 | -1.12075900 |
| N | -0.85378900 | -2.24588700 | -1.65097000 |
| C | -1.75805300 | -1.76318900 | -0.81645000 |
| H | -1.59502600 | -1.80677200 | 0.26486500  |
| C | -3.18291200 | -1.78039000 | -1.23074300 |
| C | -3.55649100 | -2.20953200 | -2.50636200 |
| C | -4.16756500 | -1.36829500 | -0.32897200 |
| C | -4.89858600 | -2.20988300 | -2.87448500 |
| H | -2.77874900 | -2.54106800 | -3.18640000 |
| C | -5.50679300 | -1.36644400 | -0.69858800 |

|   |             |             |             |
|---|-------------|-------------|-------------|
| H | -3.86794000 | -1.03693100 | 0.66202700  |
| C | -5.87600600 | -1.78642400 | -1.97613600 |
| H | -5.18471700 | -2.54373900 | -3.86699000 |
| H | -6.26283600 | -1.03434200 | 0.00747200  |
| H | -6.92141900 | -1.78667600 | -2.26856900 |
| C | 3.44188600  | 1.15514800  | -0.07795500 |
| C | 4.65137600  | 1.84035000  | -0.19542500 |
| C | 5.83911000  | 1.13835700  | -0.34196200 |
| C | 5.79215400  | -0.25589500 | -0.35218900 |
| C | 4.57961800  | -0.93365200 | -0.22737200 |
| C | 3.38263900  | -0.22900500 | -0.09976500 |
| C | 2.31920800  | 2.16045500  | 0.04287900  |
| C | 3.05653400  | 3.42057900  | 0.55621200  |
| C | 4.42116600  | 3.33348300  | -0.12992500 |
| H | 6.78671600  | 1.66166900  | -0.43092700 |
| H | 6.71323400  | -0.82166100 | -0.45272200 |
| H | 4.56071300  | -2.01833900 | -0.23233900 |
| H | 2.42948800  | -0.74356000 | -0.03120200 |
| H | 1.83932900  | 2.33870400  | -0.92386900 |
| H | 2.50149200  | 4.34765400  | 0.35397900  |
| H | 4.36837100  | 3.77631300  | -1.13148200 |
| C | 1.16440000  | 2.32215000  | 2.25124600  |
| C | 2.15860300  | 3.33287200  | 2.73703800  |
| C | 0.13940500  | 1.04094000  | 0.80023300  |
| H | 2.44263800  | 3.11222900  | 3.76741200  |
| H | 5.17206800  | 3.87672300  | 0.44862800  |
| N | 1.24402000  | 1.80300000  | 0.98989000  |
| N | 0.09443200  | 1.91606600  | 2.86722200  |
| N | -0.53529100 | 1.11936700  | 1.95453600  |
| O | 3.31582400  | 3.30053500  | 1.94973800  |
| H | 1.68238300  | 4.32558800  | 2.71092400  |
| C | -1.79751400 | 0.53760800  | 2.33146900  |
| C | -2.93560000 | 1.34270000  | 2.23049300  |
| C | -1.80567800 | -0.74539700 | 2.88245400  |
| C | -4.14437800 | 0.79193300  | 2.65171900  |
| C | -3.04186600 | -1.24804200 | 3.28810300  |
| C | -4.21569100 | -0.50194900 | 3.17181600  |
| H | -5.04997900 | 1.38787300  | 2.57247700  |
| H | -3.08545000 | -2.24887700 | 3.71007800  |
| C | -5.53890700 | -1.10640600 | 3.56092500  |
| H | -6.30078000 | -0.33857500 | 3.71001600  |
| H | -5.89003700 | -1.78250300 | 2.77380400  |
| H | -5.45213000 | -1.69079500 | 4.48022600  |
| C | -0.53316800 | -1.52929600 | 3.04429900  |

|   |             |             |            |
|---|-------------|-------------|------------|
| H | -0.71851400 | -2.43586100 | 3.62328300 |
| H | -0.11765000 | -1.82456000 | 2.07183300 |
| H | 0.21976300  | -0.93256300 | 3.57010000 |
| C | -2.84396400 | 2.74839500  | 1.69772200 |
| H | -2.22978900 | 3.36939300  | 2.35729200 |
| H | -2.38905400 | 2.77277400  | 0.70041600 |
| H | -3.83613500 | 3.19702700  | 1.62816200 |
